# Supplementary material for: Identification of hub genes associated with adult acute myeloid leukemia progression through weighted gene co-expression network analysis
Source: Aging (Albany NY). 2021 Feb 11;13(4):5686–97. doi: 10.18632/aging.202493 (PMC7950274; doi:10.18632/aging.202493)
Supplement: Supplementary Table 3 [file aging-13-202493-s003.xls]

## Sheet: output_identify_20201025215218
Supplementary Table 3. The results of GO and KEGG biofunctional analysis in black module.
##Databases: KEGG PATHWAY, Gene Ontology
##Statistical test method: hypergeometric test / Fisher's exact test
##FDR correction method: Benjamini and Hochberg
#Term	Database	ID	Input number	Background number	P-Value	Corrected P-Value	Input	Hyperlink
Malaria	KEGG PATHWAY	hsa05144	4	49	2.46658e-07	0.000166247	3040|3043|3039|2995	http://www.genome.jp/kegg-bin/show_pathway?hsa05144/hsa:3043%09red/hsa:3040%09red/hsa:3039%09red/hsa:2995%09red
African trypanosomiasis	KEGG PATHWAY	hsa05143	3	37	9.05169e-06	0.00265694	3040|3043|3039	http://www.genome.jp/kegg-bin/show_pathway?hsa05143/hsa:3043%09red/hsa:3040%09red/hsa:3039%09red
Mitophagy - animal	KEGG PATHWAY	hsa04137	3	65	4.50289e-05	0.00379368	598|51024|10133	http://www.genome.jp/kegg-bin/show_pathway?hsa04137/hsa:10133%09red/hsa:51024%09red/hsa:598%09red
AMPK signaling pathway	KEGG PATHWAY	hsa04152	2	120	0.0067399	0.0543733	51094|55437	http://www.genome.jp/kegg-bin/show_pathway?hsa04152/hsa:51094%09red/hsa:55437%09red
Sulfur metabolism	KEGG PATHWAY	hsa00920	1	10	0.0110075	0.0570697	8991	http://www.genome.jp/kegg-bin/show_pathway?hsa00920/hsa:8991%09red
Protein processing in endoplasmic reticulum	KEGG PATHWAY	hsa04141	2	165	0.0123029	0.0576277	573|80700	http://www.genome.jp/kegg-bin/show_pathway?hsa04141/hsa:80700%09red/hsa:573%09red
Metabolic pathways	KEGG PATHWAY	hsa01100	5	1433	0.0140735	0.0592848	2987|8991|212|27090|3029	http://www.genome.jp/kegg-bin/show_pathway?hsa01100/hsa:8991%09red/hsa:212%09red/hsa:3029%09red/hsa:2987%09red/hsa:27090%09red
NOD-like receptor signaling pathway	KEGG PATHWAY	hsa04621	2	178	0.0141825	0.0593728	81858|598	http://www.genome.jp/kegg-bin/show_pathway?hsa04621/hsa:81858%09red/hsa:598%09red
Glycosphingolipid biosynthesis - ganglio series	KEGG PATHWAY	hsa00604	1	15	0.0159718	0.0604635	27090	http://www.genome.jp/kegg-bin/show_pathway?hsa00604/hsa:27090%09red
Ras signaling pathway	KEGG PATHWAY	hsa04014	2	232	0.0231989	0.065416	4303|598	http://www.genome.jp/kegg-bin/show_pathway?hsa04014/hsa:4303%09red/hsa:598%09red
Apoptosis - multiple species	KEGG PATHWAY	hsa04215	1	33	0.0336431	0.0729113	598	http://www.genome.jp/kegg-bin/show_pathway?hsa04215/hsa:598%09red
Pyruvate metabolism	KEGG PATHWAY	hsa00620	1	39	0.0394645	0.0803597	3029	http://www.genome.jp/kegg-bin/show_pathway?hsa00620/hsa:3029%09red
Glycine, serine and threonine metabolism	KEGG PATHWAY	hsa00260	1	40	0.0404314	0.0811034	212	http://www.genome.jp/kegg-bin/show_pathway?hsa00260/hsa:212%09red
Homologous recombination	KEGG PATHWAY	hsa03440	1	41	0.0413973	0.0815842	29086	http://www.genome.jp/kegg-bin/show_pathway?hsa03440/hsa:29086%09red
Porphyrin and chlorophyll metabolism	KEGG PATHWAY	hsa00860	1	42	0.0423623	0.0825209	212	http://www.genome.jp/kegg-bin/show_pathway?hsa00860/hsa:212%09red
Amyotrophic lateral sclerosis (ALS)	KEGG PATHWAY	hsa05014	1	51	0.051005	0.0926613	598	http://www.genome.jp/kegg-bin/show_pathway?hsa05014/hsa:598%09red
Adipocytokine signaling pathway	KEGG PATHWAY	hsa04920	1	69	0.0680628	0.11355	51094	http://www.genome.jp/kegg-bin/show_pathway?hsa04920/hsa:51094%09red
p53 signaling pathway	KEGG PATHWAY	hsa04115	1	72	0.0708766	0.117085	598	http://www.genome.jp/kegg-bin/show_pathway?hsa04115/hsa:598%09red
Platinum drug resistance	KEGG PATHWAY	hsa01524	1	73	0.0718126	0.118342	598	http://www.genome.jp/kegg-bin/show_pathway?hsa01524/hsa:598%09red
Pancreatic cancer	KEGG PATHWAY	hsa05212	1	75	0.0736821	0.119093	598	http://www.genome.jp/kegg-bin/show_pathway?hsa05212/hsa:598%09red
Chronic myeloid leukemia	KEGG PATHWAY	hsa05220	1	76	0.0746154	0.119456	598	http://www.genome.jp/kegg-bin/show_pathway?hsa05220/hsa:598%09red
EGFR tyrosine kinase inhibitor resistance	KEGG PATHWAY	hsa01521	1	79	0.0774099	0.121244	598	http://www.genome.jp/kegg-bin/show_pathway?hsa01521/hsa:598%09red
Salmonella infection	KEGG PATHWAY	hsa05132	1	83	0.0811231	0.123984	83547	http://www.genome.jp/kegg-bin/show_pathway?hsa05132/hsa:83547%09red
Longevity regulating pathway	KEGG PATHWAY	hsa04211	1	89	0.0866656	0.129231	51094	http://www.genome.jp/kegg-bin/show_pathway?hsa04211/hsa:51094%09red
Small cell lung cancer	KEGG PATHWAY	hsa05222	1	93	0.0903425	0.132084	598	http://www.genome.jp/kegg-bin/show_pathway?hsa05222/hsa:598%09red
NF-kappa B signaling pathway	KEGG PATHWAY	hsa04064	1	100	0.0967424	0.139029	598	http://www.genome.jp/kegg-bin/show_pathway?hsa04064/hsa:598%09red
Toxoplasmosis	KEGG PATHWAY	hsa05145	1	113	0.108512	0.152369	598	http://www.genome.jp/kegg-bin/show_pathway?hsa05145/hsa:598%09red
Autophagy - animal	KEGG PATHWAY	hsa04140	1	128	0.121906	0.166325	598	http://www.genome.jp/kegg-bin/show_pathway?hsa04140/hsa:598%09red
Purine metabolism	KEGG PATHWAY	hsa00230	1	130	0.123677	0.167723	2987	http://www.genome.jp/kegg-bin/show_pathway?hsa00230/hsa:2987%09red
FoxO signaling pathway	KEGG PATHWAY	hsa04068	1	132	0.125445	0.168762	4303	http://www.genome.jp/kegg-bin/show_pathway?hsa04068/hsa:4303%09red
Apoptosis	KEGG PATHWAY	hsa04210	1	136	0.128969	0.171604	598	http://www.genome.jp/kegg-bin/show_pathway?hsa04210/hsa:598%09red
Ubiquitin mediated proteolysis	KEGG PATHWAY	hsa04120	1	137	0.129848	0.171604	997	http://www.genome.jp/kegg-bin/show_pathway?hsa04120/hsa:997%09red
Measles	KEGG PATHWAY	hsa05162	1	138	0.130727	0.172426	598	http://www.genome.jp/kegg-bin/show_pathway?hsa05162/hsa:598%09red
Signaling pathways regulating pluripotency of stem cells	KEGG PATHWAY	hsa04550	1	140	0.13248	0.174398	84333	http://www.genome.jp/kegg-bin/show_pathway?hsa04550/hsa:84333%09red
Parkinson disease	KEGG PATHWAY	hsa05012	1	142	0.134231	0.174993	6622	http://www.genome.jp/kegg-bin/show_pathway?hsa05012/hsa:6622%09red
Non-alcoholic fatty liver disease (NAFLD)	KEGG PATHWAY	hsa04932	1	149	0.140329	0.1805	51094	http://www.genome.jp/kegg-bin/show_pathway?hsa04932/hsa:51094%09red
Phagosome	KEGG PATHWAY	hsa04145	1	152	0.14293	0.182108	83547	http://www.genome.jp/kegg-bin/show_pathway?hsa04145/hsa:83547%09red
Ribosome	KEGG PATHWAY	hsa03010	1	153	0.143796	0.18252	7311	http://www.genome.jp/kegg-bin/show_pathway?hsa03010/hsa:7311%09red
mTOR signaling pathway	KEGG PATHWAY	hsa04150	1	153	0.143796	0.18252	55437	http://www.genome.jp/kegg-bin/show_pathway?hsa04150/hsa:55437%09red
Necroptosis	KEGG PATHWAY	hsa04217	1	162	0.151545	0.188801	81858	http://www.genome.jp/kegg-bin/show_pathway?hsa04217/hsa:81858%09red
Jak-STAT signaling pathway	KEGG PATHWAY	hsa04630	1	162	0.151545	0.188801	598	http://www.genome.jp/kegg-bin/show_pathway?hsa04630/hsa:598%09red
Hepatocellular carcinoma	KEGG PATHWAY	hsa05225	1	168	0.156673	0.192345	598	http://www.genome.jp/kegg-bin/show_pathway?hsa05225/hsa:598%09red
Tight junction	KEGG PATHWAY	hsa04530	1	170	0.158376	0.193301	8531	http://www.genome.jp/kegg-bin/show_pathway?hsa04530/hsa:8531%09red
Alzheimer disease	KEGG PATHWAY	hsa05010	1	171	0.159226	0.193715	6622	http://www.genome.jp/kegg-bin/show_pathway?hsa05010/hsa:6622%09red
Transcriptional misregulation in cancer	KEGG PATHWAY	hsa05202	1	186	0.171877	0.205399	598	http://www.genome.jp/kegg-bin/show_pathway?hsa05202/hsa:598%09red
Human immunodeficiency virus 1 infection	KEGG PATHWAY	hsa05170	1	212	0.193368	0.225875	598	http://www.genome.jp/kegg-bin/show_pathway?hsa05170/hsa:598%09red
Human T-cell leukemia virus 1 infection	KEGG PATHWAY	hsa05166	1	219	0.199061	0.229345	598	http://www.genome.jp/kegg-bin/show_pathway?hsa05166/hsa:598%09red
PI3K-Akt signaling pathway	KEGG PATHWAY	hsa04151	1	354	0.301491	0.32409	598	http://www.genome.jp/kegg-bin/show_pathway?hsa04151/hsa:598%09red
Herpes simplex virus 1 infection	KEGG PATHWAY	hsa05168	1	492	0.392973	0.412561	598	http://www.genome.jp/kegg-bin/show_pathway?hsa05168/hsa:598%09red
Pathways in cancer	KEGG PATHWAY	hsa05200	1	530	0.416042	0.434696	598	http://www.genome.jp/kegg-bin/show_pathway?hsa05200/hsa:598%09red
--------------------
#Term	Database	ID	Input number	Background number	P-Value	Corrected P-Value	Input	Hyperlink
--------------------
#Term	Database	ID	Input number	Background number	P-Value	Corrected P-Value	Input	Hyperlink
intracellular organelle	Gene Ontology	GO:0043229	10	1863	1.18262e-05	0.00265694	3029|573|7311|55437|81858|3040|3043|25793|29086|4601	http://amigo.geneontology.org/amigo/term/GO:0043229
heme biosynthetic process	Gene Ontology	GO:0006783	2	5	2.0626e-05	0.00308735	212|51629	http://amigo.geneontology.org/amigo/term/GO:0006783
regulation of cellular process	Gene Ontology	GO:0050794	9	1600	2.44236e-05	0.00308735	84333|10133|51094|2039|8531|3040|3043|6622|29086	http://amigo.geneontology.org/amigo/term/GO:0050794
negative regulation of signal transduction in absence of ligand	Gene Ontology	GO:1901099	2	6	2.74838e-05	0.00308735	598|55437	http://amigo.geneontology.org/amigo/term/GO:1901099
bicarbonate transport	Gene Ontology	GO:0015701	2	8	4.41143e-05	0.00379368	3040|3039	http://amigo.geneontology.org/amigo/term/GO:0015701
positive regulation of myeloid cell differentiation	Gene Ontology	GO:0045639	2	9	5.38832e-05	0.00403525	2623|54997	http://amigo.geneontology.org/amigo/term/GO:0045639
negative regulation of cellular process	Gene Ontology	GO:0048523	6	723	8.31033e-05	0.00560117	4303|2623|598|51094|8531|4601	http://amigo.geneontology.org/amigo/term/GO:0048523
negative regulation of G1/S transition of mitotic cell cycle	Gene Ontology	GO:2000134	2	15	0.000132731	0.00802434	7311|25793	http://amigo.geneontology.org/amigo/term/GO:2000134
intracellular vesicle	Gene Ontology	GO:0097708	4	261	0.000145203	0.00802434	3040|83547|6622|3039	http://amigo.geneontology.org/amigo/term/GO:0097708
detoxification	Gene Ontology	GO:0098754	2	17	0.000166678	0.00802434	6622|3039	http://amigo.geneontology.org/amigo/term/GO:0098754
blood microparticle	Gene Ontology	GO:0072562	2	17	0.000166678	0.00802434	3043|3039	http://amigo.geneontology.org/amigo/term/GO:0072562
cellular response to stress	Gene Ontology	GO:0033554	4	309	0.000273951	0.0123095	4303|573|84164|6622	http://amigo.geneontology.org/amigo/term/GO:0033554
negative regulation of nitrogen compound metabolic process	Gene Ontology	GO:0051172	4	316	0.000297913	0.0125496	54997|83547|2039|8531	http://amigo.geneontology.org/amigo/term/GO:0051172
negative regulation of programmed cell death	Gene Ontology	GO:0043069	3	131	0.000336497	0.0133411	573|2623|55437	http://amigo.geneontology.org/amigo/term/GO:0043069
RNA biosynthetic process	Gene Ontology	GO:0032774	5	612	0.000369171	0.0138234	84337|8531|6622|84333|4601	http://amigo.geneontology.org/amigo/term/GO:0032774
response to organonitrogen compound	Gene Ontology	GO:0010243	3	142	0.000423841	0.0148663	51094|6622|598	http://amigo.geneontology.org/amigo/term/GO:0010243
cell morphogenesis	Gene Ontology	GO:0000902	3	144	0.000441135	0.0148663	2623|55437|2039	http://amigo.geneontology.org/amigo/term/GO:0000902
platelet activation	Gene Ontology	GO:0030168	2	31	0.000510096	0.0158722	2623|2039	http://amigo.geneontology.org/amigo/term/GO:0030168
protein localization	Gene Ontology	GO:0008104	4	367	0.000520197	0.0158722	2987|51024|2039|4601	http://amigo.geneontology.org/amigo/term/GO:0008104
mitotic cell cycle checkpoint	Gene Ontology	GO:0007093	2	32	0.000541633	0.0158722	4303|7311	http://amigo.geneontology.org/amigo/term/GO:0007093
regulation of I-kappaB kinase/NF-kappaB signaling	Gene Ontology	GO:0043122	2	33	0.000574095	0.0161225	81858|7311	http://amigo.geneontology.org/amigo/term/GO:0043122
response to drug	Gene Ontology	GO:0042493	3	163	0.000628414	0.016637	3040|3039|598	http://amigo.geneontology.org/amigo/term/GO:0042493
negative regulation of apoptotic signaling pathway	Gene Ontology	GO:2001234	2	35	0.000641785	0.016637	2623|8531	http://amigo.geneontology.org/amigo/term/GO:2001234
cellular protein complex disassembly	Gene Ontology	GO:0043624	2	36	0.00067701	0.0169002	7111|2039	http://amigo.geneontology.org/amigo/term/GO:0043624
response to abiotic stimulus	Gene Ontology	GO:0009628	3	175	0.000769312	0.0179247	598|29086|8531	http://amigo.geneontology.org/amigo/term/GO:0009628
cofactor biosynthetic process	Gene Ontology	GO:0051188	2	39	0.000788182	0.0179247	212|6622	http://amigo.geneontology.org/amigo/term/GO:0051188
nitrogen compound metabolic process	Gene Ontology	GO:0006807	7	1541	0.000797834	0.0179247	84337|7311|2987|51629|6535|27090|83547	http://amigo.geneontology.org/amigo/term/GO:0006807
cellular response to chemical stimulus	Gene Ontology	GO:0070887	4	428	0.000917374	0.0196587	3040|7311|51094|81858	http://amigo.geneontology.org/amigo/term/GO:0070887
homeostasis of number of cells	Gene Ontology	GO:0048872	2	44	0.000991687	0.0196587	2623|212	http://amigo.geneontology.org/amigo/term/GO:0048872
regulation of neuron death	Gene Ontology	GO:1901214	2	44	0.000991687	0.0196587	598|6622	http://amigo.geneontology.org/amigo/term/GO:1901214
neurotransmitter transport	Gene Ontology	GO:0006836	2	44	0.000991687	0.0196587	3043|6622	http://amigo.geneontology.org/amigo/term/GO:0006836
establishment of localization	Gene Ontology	GO:0051234	5	773	0.00104972	0.0202145	54997|6535|6622|2039|25793	http://amigo.geneontology.org/amigo/term/GO:0051234
positive regulation of metabolic process	Gene Ontology	GO:0009893	4	457	0.00116611	0.0218322	54997|83547|55437|8531	http://amigo.geneontology.org/amigo/term/GO:0009893
regulation of hemopoiesis	Gene Ontology	GO:1903706	2	51	0.00131448	0.0239449	2623|25793	http://amigo.geneontology.org/amigo/term/GO:1903706
phosphorus metabolic process	Gene Ontology	GO:0006793	4	488	0.00148074	0.0262636	7311|2987|6622|54997	http://amigo.geneontology.org/amigo/term/GO:0006793
regulation of signaling	Gene Ontology	GO:0023051	4	495	0.00155923	0.0269467	81858|6622|2039|10133	http://amigo.geneontology.org/amigo/term/GO:0023051
cellular macromolecule metabolic process	Gene Ontology	GO:0044260	6	1269	0.00160744	0.0270854	2623|997|84333|51629|27090|81858	http://amigo.geneontology.org/amigo/term/GO:0044260
cofactor metabolic process	Gene Ontology	GO:0051186	2	59	0.00173681	0.0278717	3040|3039	http://amigo.geneontology.org/amigo/term/GO:0051186
regulation of endopeptidase activity	Gene Ontology	GO:0052548	2	59	0.00173681	0.0278717	6622|51024	http://amigo.geneontology.org/amigo/term/GO:0052548
blood coagulation	Gene Ontology	GO:0007596	2	60	0.00179357	0.0281132	3045|2039	http://amigo.geneontology.org/amigo/term/GO:0007596
endocytosis	Gene Ontology	GO:0006897	2	63	0.00196908	0.0294925	598|6622	http://amigo.geneontology.org/amigo/term/GO:0006897
reproductive structure development	Gene Ontology	GO:0048608	2	63	0.00196908	0.0294925	2623|598	http://amigo.geneontology.org/amigo/term/GO:0048608
protein metabolic process	Gene Ontology	GO:0019538	5	911	0.00215139	0.0315226	54997|997|7311|51024|51629	http://amigo.geneontology.org/amigo/term/GO:0019538
cytoplasmic vesicle membrane	Gene Ontology	GO:0030659	2	75	0.00274899	0.0390284	598|7311	http://amigo.geneontology.org/amigo/term/GO:0030659
bounding membrane of organelle	Gene Ontology	GO:0098588	3	276	0.00277947	0.0390284	598|83547|10133	http://amigo.geneontology.org/amigo/term/GO:0098588
regulation of intracellular signal transduction	Gene Ontology	GO:1902531	3	282	0.00295108	0.0405925	598|997|7311	http://amigo.geneontology.org/amigo/term/GO:1902531
regulation of cell cycle process	Gene Ontology	GO:0010564	2	81	0.00318501	0.0422628	7311|25793	http://amigo.geneontology.org/amigo/term/GO:0010564
purine ribonucleotide binding	Gene Ontology	GO:0032555	3	292	0.00325138	0.0422628	997|2987|55437	http://amigo.geneontology.org/amigo/term/GO:0032555
organelle inner membrane	Gene Ontology	GO:0019866	2	82	0.00326063	0.0422628	6622|51629	http://amigo.geneontology.org/amigo/term/GO:0019866
regulation of macromolecule biosynthetic process	Gene Ontology	GO:0010556	4	623	0.00355415	0.0445023	4303|84164|6622|4601	http://amigo.geneontology.org/amigo/term/GO:0010556
organonitrogen compound metabolic process	Gene Ontology	GO:1901564	5	1027	0.00359248	0.0445023	2987|6622|55437|3029|8531	http://amigo.geneontology.org/amigo/term/GO:1901564
drug metabolic process	Gene Ontology	GO:0017144	2	87	0.00365125	0.0445023	3043|6622	http://amigo.geneontology.org/amigo/term/GO:0017144
regulation of transcription by RNA polymerase II	Gene Ontology	GO:0006357	3	306	0.00370236	0.0445023	8531|7311|84333	http://amigo.geneontology.org/amigo/term/GO:0006357
autophagy	Gene Ontology	GO:0006914	2	89	0.00381332	0.0445023	598|6622	http://amigo.geneontology.org/amigo/term/GO:0006914
protein-containing complex	Gene Ontology	GO:0032991	4	639	0.00388713	0.0445023	7111|6622|3043|25793	http://amigo.geneontology.org/amigo/term/GO:0032991
regulation of cellular response to stress	Gene Ontology	GO:0080135	2	90	0.0038956	0.0445023	598|8531	http://amigo.geneontology.org/amigo/term/GO:0080135
epithelial cell differentiation	Gene Ontology	GO:0030855	2	93	0.00414736	0.0465887	81858|7111	http://amigo.geneontology.org/amigo/term/GO:0030855
nitrogen compound transport	Gene Ontology	GO:0071705	3	325	0.00437294	0.0483174	83547|6535|2987	http://amigo.geneontology.org/amigo/term/GO:0071705
enzyme binding	Gene Ontology	GO:0019899	3	330	0.00456085	0.0490345	4303|83547|997	http://amigo.geneontology.org/amigo/term/GO:0019899
cellular response to nitrogen compound	Gene Ontology	GO:1901699	2	98	0.00458334	0.0490345	6622|2039	http://amigo.geneontology.org/amigo/term/GO:1901699
regulation of cellular localization	Gene Ontology	GO:0060341	2	101	0.00485468	0.0511258	51024|2039	http://amigo.geneontology.org/amigo/term/GO:0060341
positive regulation of cell death	Gene Ontology	GO:0010942	2	102	0.00494674	0.0512939	997|3043	http://amigo.geneontology.org/amigo/term/GO:0010942
positive regulation of programmed cell death	Gene Ontology	GO:0043068	2	104	0.00513327	0.0524216	598|7311	http://amigo.geneontology.org/amigo/term/GO:0043068
intracellular organelle lumen	Gene Ontology	GO:0070013	4	712	0.00567706	0.0543733	4303|8991|212|4601	http://amigo.geneontology.org/amigo/term/GO:0070013
dopamine uptake involved in synaptic transmission	Gene Ontology	GO:0051583	1	5	0.00601881	0.0543733	6622	http://amigo.geneontology.org/amigo/term/GO:0051583
purine nucleoside biosynthetic process	Gene Ontology	GO:0042451	1	5	0.00601881	0.0543733	2987	http://amigo.geneontology.org/amigo/term/GO:0042451
erythrocyte development	Gene Ontology	GO:0048821	1	5	0.00601881	0.0543733	2039	http://amigo.geneontology.org/amigo/term/GO:0048821
regulation of transcription regulatory region DNA binding	Gene Ontology	GO:2000677	1	5	0.00601881	0.0543733	2623	http://amigo.geneontology.org/amigo/term/GO:2000677
organelle lumen	Gene Ontology	GO:0043233	4	725	0.00604508	0.0543733	4303|8991|212|4601	http://amigo.geneontology.org/amigo/term/GO:0043233
cellular response to organic substance	Gene Ontology	GO:0071310	3	373	0.00638038	0.0543733	2623|6622|54997	http://amigo.geneontology.org/amigo/term/GO:0071310
nucleus	Gene Ontology	GO:0005634	5	1182	0.00646667	0.0543733	84337|598|6622|10169|10133	http://amigo.geneontology.org/amigo/term/GO:0005634
protein ubiquitination	Gene Ontology	GO:0016567	2	118	0.00652807	0.0543733	997|25793	http://amigo.geneontology.org/amigo/term/GO:0016567
response to wounding	Gene Ontology	GO:0009611	2	118	0.00652807	0.0543733	2623|2039	http://amigo.geneontology.org/amigo/term/GO:0009611
metabolic process	Gene Ontology	GO:0008152	6	1706	0.00685348	0.0543733	212|51024|598|2987|27090|84164	http://amigo.geneontology.org/amigo/term/GO:0008152
solute:sodium symporter activity	Gene Ontology	GO:0015370	1	6	0.00701851	0.0543733	6535	http://amigo.geneontology.org/amigo/term/GO:0015370
negative regulation of cell cycle G2/M phase transition	Gene Ontology	GO:1902750	1	6	0.00701851	0.0543733	4303	http://amigo.geneontology.org/amigo/term/GO:1902750
solute:cation antiporter activity	Gene Ontology	GO:0015298	1	6	0.00701851	0.0543733	54997	http://amigo.geneontology.org/amigo/term/GO:0015298
polyubiquitin modification-dependent protein binding	Gene Ontology	GO:0031593	1	6	0.00701851	0.0543733	81858	http://amigo.geneontology.org/amigo/term/GO:0031593
endoplasmic reticulum calcium ion homeostasis	Gene Ontology	GO:0032469	1	6	0.00701851	0.0543733	51024	http://amigo.geneontology.org/amigo/term/GO:0032469
negative regulation of cyclin-dependent protein kinase activity	Gene Ontology	GO:1904030	1	6	0.00701851	0.0543733	25793	http://amigo.geneontology.org/amigo/term/GO:1904030
regulation of extrinsic apoptotic signaling pathway in absence of ligand	Gene Ontology	GO:2001239	1	6	0.00701851	0.0543733	598	http://amigo.geneontology.org/amigo/term/GO:2001239
hydrogen peroxide catabolic process	Gene Ontology	GO:0042744	1	6	0.00701851	0.0543733	3039	http://amigo.geneontology.org/amigo/term/GO:0042744
DNA damage response, detection of DNA damage	Gene Ontology	GO:0042769	1	6	0.00701851	0.0543733	7311	http://amigo.geneontology.org/amigo/term/GO:0042769
peptide biosynthetic process	Gene Ontology	GO:0043043	2	125	0.00728302	0.054861	8531|3029	http://amigo.geneontology.org/amigo/term/GO:0043043
regulation of transcription from RNA polymerase II promoter in response to hypoxia	Gene Ontology	GO:0061418	1	7	0.00801723	0.054861	7311	http://amigo.geneontology.org/amigo/term/GO:0061418
positive regulation of myeloid leukocyte differentiation	Gene Ontology	GO:0002763	1	7	0.00801723	0.054861	54997	http://amigo.geneontology.org/amigo/term/GO:0002763
regulation of insulin receptor signaling pathway	Gene Ontology	GO:0046626	1	7	0.00801723	0.054861	51094	http://amigo.geneontology.org/amigo/term/GO:0046626
DNA replication initiation	Gene Ontology	GO:0006270	1	7	0.00801723	0.054861	997	http://amigo.geneontology.org/amigo/term/GO:0006270
negative regulation of muscle cell differentiation	Gene Ontology	GO:0051148	1	7	0.00801723	0.054861	4303	http://amigo.geneontology.org/amigo/term/GO:0051148
negative regulation of histone modification	Gene Ontology	GO:0031057	1	7	0.00801723	0.054861	6622	http://amigo.geneontology.org/amigo/term/GO:0031057
acyl-CoA biosynthetic process	Gene Ontology	GO:0071616	1	7	0.00801723	0.054861	6622	http://amigo.geneontology.org/amigo/term/GO:0071616
regulation of adherens junction organization	Gene Ontology	GO:1903391	1	7	0.00801723	0.054861	2039	http://amigo.geneontology.org/amigo/term/GO:1903391
negative regulation of response to DNA damage stimulus	Gene Ontology	GO:2001021	1	7	0.00801723	0.054861	598	http://amigo.geneontology.org/amigo/term/GO:2001021
organic substance transport	Gene Ontology	GO:0071702	3	421	0.00885966	0.054861	3040|3039|51024	http://amigo.geneontology.org/amigo/term/GO:0071702
signal transduction involved in DNA integrity checkpoint	Gene Ontology	GO:0072401	1	8	0.00901496	0.054861	7311	http://amigo.geneontology.org/amigo/term/GO:0072401
positive regulation of neuron apoptotic process	Gene Ontology	GO:0043525	1	8	0.00901496	0.054861	997	http://amigo.geneontology.org/amigo/term/GO:0043525
regulation of erythrocyte differentiation	Gene Ontology	GO:0045646	1	8	0.00901496	0.054861	2623	http://amigo.geneontology.org/amigo/term/GO:0045646
synaptic transmission, dopaminergic	Gene Ontology	GO:0001963	1	8	0.00901496	0.054861	6622	http://amigo.geneontology.org/amigo/term/GO:0001963
antibiotic catabolic process	Gene Ontology	GO:0017001	1	8	0.00901496	0.054861	3043	http://amigo.geneontology.org/amigo/term/GO:0017001
catecholamine secretion	Gene Ontology	GO:0050432	1	8	0.00901496	0.054861	6622	http://amigo.geneontology.org/amigo/term/GO:0050432
neurotransmitter transmembrane transporter activity	Gene Ontology	GO:0005326	1	8	0.00901496	0.054861	6535	http://amigo.geneontology.org/amigo/term/GO:0005326
cytosolic small ribosomal subunit	Gene Ontology	GO:0022627	1	8	0.00901496	0.054861	3040	http://amigo.geneontology.org/amigo/term/GO:0022627
cytoplasmic pattern recognition receptor signaling pathway	Gene Ontology	GO:0002753	1	8	0.00901496	0.054861	7311	http://amigo.geneontology.org/amigo/term/GO:0002753
mitochondrial respiratory chain complex I	Gene Ontology	GO:0005747	1	8	0.00901496	0.054861	6622	http://amigo.geneontology.org/amigo/term/GO:0005747
G2 DNA damage checkpoint	Gene Ontology	GO:0031572	1	8	0.00901496	0.054861	29086	http://amigo.geneontology.org/amigo/term/GO:0031572
regulation of catecholamine secretion	Gene Ontology	GO:0050433	1	8	0.00901496	0.054861	6622	http://amigo.geneontology.org/amigo/term/GO:0050433
regulation of cellular catabolic process	Gene Ontology	GO:0031329	2	141	0.00914905	0.054861	598|6622	http://amigo.geneontology.org/amigo/term/GO:0031329
regulation of primary metabolic process	Gene Ontology	GO:0080090	4	823	0.00934266	0.054861	4303|54997|6622|25793	http://amigo.geneontology.org/amigo/term/GO:0080090
intracellular signal transduction	Gene Ontology	GO:0035556	3	430	0.00937903	0.054861	81858|51024|8531	http://amigo.geneontology.org/amigo/term/GO:0035556
biological regulation	Gene Ontology	GO:0065007	6	1832	0.00957162	0.054861	997|84333|8531|84164|6622|3043	http://amigo.geneontology.org/amigo/term/GO:0065007
cysteine-type endopeptidase inhibitor activity	Gene Ontology	GO:0004869	1	9	0.0100117	0.054861	6622	http://amigo.geneontology.org/amigo/term/GO:0004869
glucan biosynthetic process	Gene Ontology	GO:0009250	1	9	0.0100117	0.054861	7311	http://amigo.geneontology.org/amigo/term/GO:0009250
programmed necrotic cell death	Gene Ontology	GO:0097300	1	9	0.0100117	0.054861	8531	http://amigo.geneontology.org/amigo/term/GO:0097300
cellular response to calcium ion	Gene Ontology	GO:0071277	1	9	0.0100117	0.054861	2039	http://amigo.geneontology.org/amigo/term/GO:0071277
RNA polymerase II core promoter sequence-specific DNA binding	Gene Ontology	GO:0000979	1	9	0.0100117	0.054861	2623	http://amigo.geneontology.org/amigo/term/GO:0000979
negative regulation of mRNA catabolic process	Gene Ontology	GO:1902373	1	9	0.0100117	0.054861	8531	http://amigo.geneontology.org/amigo/term/GO:1902373
homotypic cell-cell adhesion	Gene Ontology	GO:0034109	1	9	0.0100117	0.054861	2623	http://amigo.geneontology.org/amigo/term/GO:0034109
oxidoreductase activity, acting on peroxide as acceptor	Gene Ontology	GO:0016684	1	9	0.0100117	0.054861	3043	http://amigo.geneontology.org/amigo/term/GO:0016684
regulation of alcohol biosynthetic process	Gene Ontology	GO:1902930	1	9	0.0100117	0.054861	6622	http://amigo.geneontology.org/amigo/term/GO:1902930
protein modification by small protein conjugation	Gene Ontology	GO:0032446	2	152	0.0105427	0.0570697	81858|25793	http://amigo.geneontology.org/amigo/term/GO:0032446
protein kinase inhibitor activity	Gene Ontology	GO:0004860	1	10	0.0110075	0.0570697	54997	http://amigo.geneontology.org/amigo/term/GO:0004860
regulation of neuronal synaptic plasticity	Gene Ontology	GO:0048168	1	10	0.0110075	0.0570697	6622	http://amigo.geneontology.org/amigo/term/GO:0048168
phosphoprotein binding	Gene Ontology	GO:0051219	1	10	0.0110075	0.0570697	6622	http://amigo.geneontology.org/amigo/term/GO:0051219
negative regulation of lymphocyte differentiation	Gene Ontology	GO:0045620	1	10	0.0110075	0.0570697	25793	http://amigo.geneontology.org/amigo/term/GO:0045620
porphyrin-containing compound metabolic process	Gene Ontology	GO:0006778	1	10	0.0110075	0.0570697	212	http://amigo.geneontology.org/amigo/term/GO:0006778
cellular process	Gene Ontology	GO:0009987	7	2484	0.0111967	0.0576075	54997|3039|3029|27090|4601|29086|25793	http://amigo.geneontology.org/amigo/term/GO:0009987
defense response to other organism	Gene Ontology	GO:0098542	2	159	0.0114754	0.0576277	6622|10133	http://amigo.geneontology.org/amigo/term/GO:0098542
DNA damage response, signal transduction by p53 class mediator resulting in cell cycle arrest	Gene Ontology	GO:0006977	1	11	0.0120023	0.0576277	7311	http://amigo.geneontology.org/amigo/term/GO:0006977
DNA duplex unwinding	Gene Ontology	GO:0032508	1	11	0.0120023	0.0576277	7311	http://amigo.geneontology.org/amigo/term/GO:0032508
regulation of mitochondrial membrane permeability	Gene Ontology	GO:0046902	1	11	0.0120023	0.0576277	598	http://amigo.geneontology.org/amigo/term/GO:0046902
cellular response to ionizing radiation	Gene Ontology	GO:0071479	1	11	0.0120023	0.0576277	598	http://amigo.geneontology.org/amigo/term/GO:0071479
intracellular transport of virus	Gene Ontology	GO:0075733	1	11	0.0120023	0.0576277	7311	http://amigo.geneontology.org/amigo/term/GO:0075733
positive regulation of carbohydrate metabolic process	Gene Ontology	GO:0045913	1	11	0.0120023	0.0576277	6622	http://amigo.geneontology.org/amigo/term/GO:0045913
localization	Gene Ontology	GO:0051179	4	896	0.0124454	0.0576277	3043|10133|6622|4601	http://amigo.geneontology.org/amigo/term/GO:0051179
regulation of nitrogen compound metabolic process	Gene Ontology	GO:0051171	4	900	0.0126323	0.0576277	4303|7311|29086|4601	http://amigo.geneontology.org/amigo/term/GO:0051171
positive regulation of transcription by RNA polymerase II	Gene Ontology	GO:0045944	2	169	0.0128687	0.0576277	4303|84333	http://amigo.geneontology.org/amigo/term/GO:0045944
regulation of phospholipase activity	Gene Ontology	GO:0010517	1	12	0.0129962	0.0576277	6622	http://amigo.geneontology.org/amigo/term/GO:0010517
lens development in camera-type eye	Gene Ontology	GO:0002088	1	12	0.0129962	0.0576277	7111	http://amigo.geneontology.org/amigo/term/GO:0002088
cofactor transport	Gene Ontology	GO:0051181	1	12	0.0129962	0.0576277	6535	http://amigo.geneontology.org/amigo/term/GO:0051181
regulation of blood coagulation	Gene Ontology	GO:0030193	1	12	0.0129962	0.0576277	2039	http://amigo.geneontology.org/amigo/term/GO:0030193
fatty acid oxidation	Gene Ontology	GO:0019395	1	12	0.0129962	0.0576277	51094	http://amigo.geneontology.org/amigo/term/GO:0019395
regulation of cell cycle G2/M phase transition	Gene Ontology	GO:1902749	1	12	0.0129962	0.0576277	4303	http://amigo.geneontology.org/amigo/term/GO:1902749
actin cytoskeleton reorganization	Gene Ontology	GO:0031532	1	12	0.0129962	0.0576277	2039	http://amigo.geneontology.org/amigo/term/GO:0031532
mitotic DNA integrity checkpoint	Gene Ontology	GO:0044774	1	12	0.0129962	0.0576277	7311	http://amigo.geneontology.org/amigo/term/GO:0044774
phagocytic vesicle membrane	Gene Ontology	GO:0030670	1	12	0.0129962	0.0576277	83547	http://amigo.geneontology.org/amigo/term/GO:0030670
iron ion homeostasis	Gene Ontology	GO:0055072	1	12	0.0129962	0.0576277	212	http://amigo.geneontology.org/amigo/term/GO:0055072
negative regulation of nucleic acid-templated transcription	Gene Ontology	GO:1903507	2	171	0.0131558	0.0579541	2623|8531	http://amigo.geneontology.org/amigo/term/GO:1903507
oxidation-reduction process	Gene Ontology	GO:0055114	2	174	0.0135916	0.0591017	3040|51094	http://amigo.geneontology.org/amigo/term/GO:0055114
peptidyl-amino acid modification	Gene Ontology	GO:0018193	2	174	0.0135916	0.0591017	6622|27090	http://amigo.geneontology.org/amigo/term/GO:0018193
protein heterooligomerization	Gene Ontology	GO:0051291	1	13	0.013989	0.0592848	3039	http://amigo.geneontology.org/amigo/term/GO:0051291
negative regulation of mitochondrion organization	Gene Ontology	GO:0010823	1	13	0.013989	0.0592848	598	http://amigo.geneontology.org/amigo/term/GO:0010823
regulation of focal adhesion assembly	Gene Ontology	GO:0051893	1	13	0.013989	0.0592848	2039	http://amigo.geneontology.org/amigo/term/GO:0051893
ammonium transport	Gene Ontology	GO:0015696	1	13	0.013989	0.0592848	6622	http://amigo.geneontology.org/amigo/term/GO:0015696
macromolecule metabolic process	Gene Ontology	GO:0043170	5	1440	0.0143466	0.0596889	4303|212|51024|2039|25793	http://amigo.geneontology.org/amigo/term/GO:0043170
ruffle membrane	Gene Ontology	GO:0032587	1	14	0.0149809	0.0597463	54997	http://amigo.geneontology.org/amigo/term/GO:0032587
polysaccharide biosynthetic process	Gene Ontology	GO:0000271	1	14	0.0149809	0.0597463	7311	http://amigo.geneontology.org/amigo/term/GO:0000271
cyclin-dependent protein serine/threonine kinase activity	Gene Ontology	GO:0004693	1	14	0.0149809	0.0597463	25793	http://amigo.geneontology.org/amigo/term/GO:0004693
purine nucleoside bisphosphate biosynthetic process	Gene Ontology	GO:0034033	1	14	0.0149809	0.0597463	6622	http://amigo.geneontology.org/amigo/term/GO:0034033
sphingolipid biosynthetic process	Gene Ontology	GO:0030148	1	14	0.0149809	0.0597463	27090	http://amigo.geneontology.org/amigo/term/GO:0030148
extrinsic apoptotic signaling pathway in absence of ligand	Gene Ontology	GO:0097192	1	14	0.0149809	0.0597463	598	http://amigo.geneontology.org/amigo/term/GO:0097192
substrate adhesion-dependent cell spreading	Gene Ontology	GO:0034446	1	14	0.0149809	0.0597463	2039	http://amigo.geneontology.org/amigo/term/GO:0034446
biosynthetic process	Gene Ontology	GO:0009058	4	952	0.0152289	0.0603783	2623|6622|3029|84333	http://amigo.geneontology.org/amigo/term/GO:0009058
cortical cytoskeleton	Gene Ontology	GO:0030863	1	15	0.0159718	0.0604635	2995	http://amigo.geneontology.org/amigo/term/GO:0030863
negative regulation of angiogenesis	Gene Ontology	GO:0016525	1	15	0.0159718	0.0604635	4303	http://amigo.geneontology.org/amigo/term/GO:0016525
regulation of calcium ion transport into cytosol	Gene Ontology	GO:0010522	1	15	0.0159718	0.0604635	6622	http://amigo.geneontology.org/amigo/term/GO:0010522
apical junction complex	Gene Ontology	GO:0043296	1	15	0.0159718	0.0604635	8531	http://amigo.geneontology.org/amigo/term/GO:0043296
DNA damage checkpoint	Gene Ontology	GO:0000077	1	15	0.0159718	0.0604635	4303	http://amigo.geneontology.org/amigo/term/GO:0000077
regulation of peptidyl-serine phosphorylation	Gene Ontology	GO:0033135	1	15	0.0159718	0.0604635	2039	http://amigo.geneontology.org/amigo/term/GO:0033135
response to alkaloid	Gene Ontology	GO:0043279	1	15	0.0159718	0.0604635	598	http://amigo.geneontology.org/amigo/term/GO:0043279
regulation of protein phosphorylation	Gene Ontology	GO:0001932	2	192	0.0163366	0.0604635	2623|7311	http://amigo.geneontology.org/amigo/term/GO:0001932
cell cycle process	Gene Ontology	GO:0022402	2	193	0.0164956	0.0604635	55437|10133	http://amigo.geneontology.org/amigo/term/GO:0022402
negative regulation of signal transduction	Gene Ontology	GO:0009968	2	193	0.0164956	0.0604635	598|997	http://amigo.geneontology.org/amigo/term/GO:0009968
protein depolymerization	Gene Ontology	GO:0051261	1	16	0.0169618	0.0604635	2039	http://amigo.geneontology.org/amigo/term/GO:0051261
regulation of defense response to virus by host	Gene Ontology	GO:0050691	1	16	0.0169618	0.0604635	7311	http://amigo.geneontology.org/amigo/term/GO:0050691
DNA integrity checkpoint	Gene Ontology	GO:0031570	1	16	0.0169618	0.0604635	4303	http://amigo.geneontology.org/amigo/term/GO:0031570
negative regulation of cellular response to transforming growth factor beta stimulus	Gene Ontology	GO:1903845	1	16	0.0169618	0.0604635	7311	http://amigo.geneontology.org/amigo/term/GO:1903845
cellular response to endogenous stimulus	Gene Ontology	GO:0071495	2	197	0.0171379	0.0604635	7311|6622	http://amigo.geneontology.org/amigo/term/GO:0071495
organelle	Gene Ontology	GO:0043226	6	2086	0.0172821	0.0604635	54997|997|8991|7111|6622|2039	http://amigo.geneontology.org/amigo/term/GO:0043226
positive regulation of protein metabolic process	Gene Ontology	GO:0051247	2	201	0.0177907	0.0604635	83547|51024	http://amigo.geneontology.org/amigo/term/GO:0051247
regulation of protein complex disassembly	Gene Ontology	GO:0043244	1	17	0.0179507	0.0604635	2039	http://amigo.geneontology.org/amigo/term/GO:0043244
neutral lipid metabolic process	Gene Ontology	GO:0006638	1	17	0.0179507	0.0604635	6622	http://amigo.geneontology.org/amigo/term/GO:0006638
stem cell differentiation	Gene Ontology	GO:0048863	1	17	0.0179507	0.0604635	4303	http://amigo.geneontology.org/amigo/term/GO:0048863
respiratory electron transport chain	Gene Ontology	GO:0022904	1	17	0.0179507	0.0604635	6622	http://amigo.geneontology.org/amigo/term/GO:0022904
innate immune response activating cell surface receptor signaling pathway	Gene Ontology	GO:0002220	1	17	0.0179507	0.0604635	7311	http://amigo.geneontology.org/amigo/term/GO:0002220
cell-substrate junction assembly	Gene Ontology	GO:0007044	1	17	0.0179507	0.0604635	2039	http://amigo.geneontology.org/amigo/term/GO:0007044
DNA-dependent DNA replication	Gene Ontology	GO:0006261	1	17	0.0179507	0.0604635	997	http://amigo.geneontology.org/amigo/term/GO:0006261
polyol metabolic process	Gene Ontology	GO:0019751	1	17	0.0179507	0.0604635	6622	http://amigo.geneontology.org/amigo/term/GO:0019751
regulation of cell cycle arrest	Gene Ontology	GO:0071156	1	17	0.0179507	0.0604635	4303	http://amigo.geneontology.org/amigo/term/GO:0071156
positive regulation of ion transmembrane transport	Gene Ontology	GO:0034767	1	17	0.0179507	0.0604635	54997	http://amigo.geneontology.org/amigo/term/GO:0034767
response to monoamine	Gene Ontology	GO:0071867	1	17	0.0179507	0.0604635	6622	http://amigo.geneontology.org/amigo/term/GO:0071867
apoptotic mitochondrial changes	Gene Ontology	GO:0008637	1	17	0.0179507	0.0604635	51024	http://amigo.geneontology.org/amigo/term/GO:0008637
negative regulation of cellular macromolecule biosynthetic process	Gene Ontology	GO:2000113	2	203	0.0181211	0.0604635	8531|7311	http://amigo.geneontology.org/amigo/term/GO:2000113
cell adhesion	Gene Ontology	GO:0007155	2	203	0.0181211	0.0604635	2623|2039	http://amigo.geneontology.org/amigo/term/GO:0007155
regulation of biological quality	Gene Ontology	GO:0065008	3	554	0.0183634	0.06097	2623|7111|54997	http://amigo.geneontology.org/amigo/term/GO:0065008
cellular nitrogen compound metabolic process	Gene Ontology	GO:0034641	4	1017	0.0189223	0.0616652	84337|54997|2987|3029	http://amigo.geneontology.org/amigo/term/GO:0034641
tight junction	Gene Ontology	GO:0070160	1	18	0.0189387	0.0616652	8531	http://amigo.geneontology.org/amigo/term/GO:0070160
negative regulation of inflammatory response	Gene Ontology	GO:0050728	1	18	0.0189387	0.0616652	81858	http://amigo.geneontology.org/amigo/term/GO:0050728
regulation of fatty acid metabolic process	Gene Ontology	GO:0019217	1	18	0.0189387	0.0616652	6622	http://amigo.geneontology.org/amigo/term/GO:0019217
regulation of apoptotic process	Gene Ontology	GO:0042981	2	210	0.0192979	0.0621758	6622|55437	http://amigo.geneontology.org/amigo/term/GO:0042981
positive regulation of endopeptidase activity	Gene Ontology	GO:0010950	1	19	0.0199258	0.0621758	6622	http://amigo.geneontology.org/amigo/term/GO:0010950
negative regulation of cytoskeleton organization	Gene Ontology	GO:0051494	1	19	0.0199258	0.0621758	6622	http://amigo.geneontology.org/amigo/term/GO:0051494
neuron projection terminus	Gene Ontology	GO:0044306	1	19	0.0199258	0.0621758	6622	http://amigo.geneontology.org/amigo/term/GO:0044306
positive regulation of cellular amide metabolic process	Gene Ontology	GO:0034250	1	19	0.0199258	0.0621758	8531	http://amigo.geneontology.org/amigo/term/GO:0034250
negative regulation of supramolecular fiber organization	Gene Ontology	GO:1902904	1	19	0.0199258	0.0621758	6622	http://amigo.geneontology.org/amigo/term/GO:1902904
nucleobase-containing small molecule biosynthetic process	Gene Ontology	GO:0034404	1	19	0.0199258	0.0621758	2987	http://amigo.geneontology.org/amigo/term/GO:0034404
response to fibroblast growth factor	Gene Ontology	GO:0071774	1	19	0.0199258	0.0621758	7311	http://amigo.geneontology.org/amigo/term/GO:0071774
inner mitochondrial membrane protein complex	Gene Ontology	GO:0098800	1	19	0.0199258	0.0621758	6622	http://amigo.geneontology.org/amigo/term/GO:0098800
toll-like receptor signaling pathway	Gene Ontology	GO:0002224	1	20	0.0209118	0.064654	7311	http://amigo.geneontology.org/amigo/term/GO:0002224
cellular response to metal ion	Gene Ontology	GO:0071248	1	20	0.0209118	0.064654	6622	http://amigo.geneontology.org/amigo/term/GO:0071248
protein-containing complex assembly	Gene Ontology	GO:0065003	2	223	0.0215664	0.065416	3043|2039	http://amigo.geneontology.org/amigo/term/GO:0065003
negative regulation of protein catabolic process	Gene Ontology	GO:0042177	1	21	0.0218969	0.065416	6622	http://amigo.geneontology.org/amigo/term/GO:0042177
negative regulation of chromosome organization	Gene Ontology	GO:2001251	1	21	0.0218969	0.065416	6622	http://amigo.geneontology.org/amigo/term/GO:2001251
proton transmembrane transporter activity	Gene Ontology	GO:0015078	1	21	0.0218969	0.065416	54997	http://amigo.geneontology.org/amigo/term/GO:0015078
extracellular space	Gene Ontology	GO:0005615	3	596	0.0221994	0.065416	3043|6622|3029	http://amigo.geneontology.org/amigo/term/GO:0005615
regulation of anion transport	Gene Ontology	GO:0044070	1	22	0.0228811	0.065416	6622	http://amigo.geneontology.org/amigo/term/GO:0044070
ribosomal subunit	Gene Ontology	GO:0044391	1	22	0.0228811	0.065416	3040	http://amigo.geneontology.org/amigo/term/GO:0044391
pyruvate metabolic process	Gene Ontology	GO:0006090	1	22	0.0228811	0.065416	3029	http://amigo.geneontology.org/amigo/term/GO:0006090
tetrapyrrole binding	Gene Ontology	GO:0046906	1	22	0.0228811	0.065416	3040	http://amigo.geneontology.org/amigo/term/GO:0046906
regulation of cytokine-mediated signaling pathway	Gene Ontology	GO:0001959	1	22	0.0228811	0.065416	81858	http://amigo.geneontology.org/amigo/term/GO:0001959
cellular response to acid chemical	Gene Ontology	GO:0071229	1	22	0.0228811	0.065416	598	http://amigo.geneontology.org/amigo/term/GO:0071229
regulation of actin polymerization or depolymerization	Gene Ontology	GO:0008064	1	22	0.0228811	0.065416	2039	http://amigo.geneontology.org/amigo/term/GO:0008064
intracellular	Gene Ontology	GO:0005622	6	2228	0.0230983	0.065416	212|3039|2995|80700|4601|25793	http://amigo.geneontology.org/amigo/term/GO:0005622
cellular protein modification process	Gene Ontology	GO:0006464	3	607	0.0232713	0.065416	2623|27090|25793	http://amigo.geneontology.org/amigo/term/GO:0006464
homeostatic process	Gene Ontology	GO:0042592	2	233	0.0233834	0.065416	212|2039	http://amigo.geneontology.org/amigo/term/GO:0042592
cytoplasm	Gene Ontology	GO:0005737	5	1641	0.0237899	0.065416	3043|83547|6622|997|29086	http://amigo.geneontology.org/amigo/term/GO:0005737
male gonad development	Gene Ontology	GO:0008584	1	23	0.0238642	0.065416	8531	http://amigo.geneontology.org/amigo/term/GO:0008584
regulation of histone modification	Gene Ontology	GO:0031056	1	23	0.0238642	0.065416	6622	http://amigo.geneontology.org/amigo/term/GO:0031056
core promoter binding	Gene Ontology	GO:0001047	1	23	0.0238642	0.065416	2623	http://amigo.geneontology.org/amigo/term/GO:0001047
cellular response to fibroblast growth factor stimulus	Gene Ontology	GO:0044344	1	23	0.0238642	0.065416	7311	http://amigo.geneontology.org/amigo/term/GO:0044344
membrane lipid biosynthetic process	Gene Ontology	GO:0046467	1	23	0.0238642	0.065416	27090	http://amigo.geneontology.org/amigo/term/GO:0046467
iron ion binding	Gene Ontology	GO:0005506	1	23	0.0238642	0.065416	3040	http://amigo.geneontology.org/amigo/term/GO:0005506
renal system process	Gene Ontology	GO:0003014	1	23	0.0238642	0.065416	3043	http://amigo.geneontology.org/amigo/term/GO:0003014
calcium ion transmembrane import into cytosol	Gene Ontology	GO:0097553	1	23	0.0238642	0.065416	6622	http://amigo.geneontology.org/amigo/term/GO:0097553
regulation of programmed cell death	Gene Ontology	GO:0043067	2	237	0.0241273	0.065416	598|51024	http://amigo.geneontology.org/amigo/term/GO:0043067
defense response	Gene Ontology	GO:0006952	2	237	0.0241273	0.065416	81858|10133	http://amigo.geneontology.org/amigo/term/GO:0006952
negative regulation of biosynthetic process	Gene Ontology	GO:0009890	2	239	0.0245029	0.065416	2623|4601	http://amigo.geneontology.org/amigo/term/GO:0009890
regulation of RNA biosynthetic process	Gene Ontology	GO:2001141	3	621	0.0246759	0.065416	4303|6622|4601	http://amigo.geneontology.org/amigo/term/GO:2001141
negative regulation of ion transport	Gene Ontology	GO:0043271	1	24	0.0248464	0.065416	6622	http://amigo.geneontology.org/amigo/term/GO:0043271
response to hydrogen peroxide	Gene Ontology	GO:0042542	1	24	0.0248464	0.065416	3039	http://amigo.geneontology.org/amigo/term/GO:0042542
fibroblast growth factor receptor signaling pathway	Gene Ontology	GO:0008543	1	24	0.0248464	0.065416	7311	http://amigo.geneontology.org/amigo/term/GO:0008543
negative regulation of cellular catabolic process	Gene Ontology	GO:0031330	1	24	0.0248464	0.065416	6622	http://amigo.geneontology.org/amigo/term/GO:0031330
insulin receptor signaling pathway	Gene Ontology	GO:0008286	1	24	0.0248464	0.065416	51094	http://amigo.geneontology.org/amigo/term/GO:0008286
regulation of wound healing	Gene Ontology	GO:0061041	1	24	0.0248464	0.065416	2039	http://amigo.geneontology.org/amigo/term/GO:0061041
response to organophosphorus	Gene Ontology	GO:0046683	1	24	0.0248464	0.065416	2039	http://amigo.geneontology.org/amigo/term/GO:0046683
regulation of cell cycle G1/S phase transition	Gene Ontology	GO:1902806	1	24	0.0248464	0.065416	7311	http://amigo.geneontology.org/amigo/term/GO:1902806
nucleotide-excision repair	Gene Ontology	GO:0006289	1	24	0.0248464	0.065416	7311	http://amigo.geneontology.org/amigo/term/GO:0006289
signaling receptor binding	Gene Ontology	GO:0005102	2	243	0.0252614	0.0654658	51024|2039	http://amigo.geneontology.org/amigo/term/GO:0005102
cellular response to stimulus	Gene Ontology	GO:0051716	4	1113	0.0253276	0.0654658	997|6622|2039|10133	http://amigo.geneontology.org/amigo/term/GO:0051716
positive regulation of nucleic acid-templated transcription	Gene Ontology	GO:1903508	2	244	0.0254525	0.0654658	4303|7311	http://amigo.geneontology.org/amigo/term/GO:1903508
proteolysis	Gene Ontology	GO:0006508	2	245	0.0256442	0.0654658	997|25793	http://amigo.geneontology.org/amigo/term/GO:0006508
biomineral tissue development	Gene Ontology	GO:0031214	1	25	0.0258277	0.0654658	2623	http://amigo.geneontology.org/amigo/term/GO:0031214
antigen processing and presentation of peptide antigen	Gene Ontology	GO:0048002	1	25	0.0258277	0.0654658	83547	http://amigo.geneontology.org/amigo/term/GO:0048002
regulation of actin filament polymerization	Gene Ontology	GO:0030833	1	25	0.0258277	0.0654658	2039	http://amigo.geneontology.org/amigo/term/GO:0030833
asymmetric synapse	Gene Ontology	GO:0032279	1	25	0.0258277	0.0654658	81858	http://amigo.geneontology.org/amigo/term/GO:0032279
regulation of RNA stability	Gene Ontology	GO:0043487	1	25	0.0258277	0.0654658	8531	http://amigo.geneontology.org/amigo/term/GO:0043487
cellular protein localization	Gene Ontology	GO:0034613	2	247	0.0260294	0.0654658	7311|2039	http://amigo.geneontology.org/amigo/term/GO:0034613
protein binding	Gene Ontology	GO:0005515	5	1688	0.0264703	0.0654658	10133|3045|2995|29086|4601	http://amigo.geneontology.org/amigo/term/GO:0005515
regulation of cell death	Gene Ontology	GO:0010941	2	250	0.0266116	0.0654658	2623|8531	http://amigo.geneontology.org/amigo/term/GO:0010941
histone binding	Gene Ontology	GO:0042393	1	26	0.026808	0.0654658	6622	http://amigo.geneontology.org/amigo/term/GO:0042393
regulation of chromatin organization	Gene Ontology	GO:1902275	1	26	0.026808	0.0654658	6622	http://amigo.geneontology.org/amigo/term/GO:1902275
regulation of protein targeting	Gene Ontology	GO:1903533	1	26	0.026808	0.0654658	51024	http://amigo.geneontology.org/amigo/term/GO:1903533
positive regulation of cell cycle process	Gene Ontology	GO:0090068	1	26	0.026808	0.0654658	7311	http://amigo.geneontology.org/amigo/term/GO:0090068
Rab GTPase binding	Gene Ontology	GO:0017137	1	26	0.026808	0.0654658	10133	http://amigo.geneontology.org/amigo/term/GO:0017137
negative regulation of cell cycle phase transition	Gene Ontology	GO:1901988	1	26	0.026808	0.0654658	25793	http://amigo.geneontology.org/amigo/term/GO:1901988
intrinsic component of endoplasmic reticulum membrane	Gene Ontology	GO:0031227	1	26	0.026808	0.0654658	55831	http://amigo.geneontology.org/amigo/term/GO:0031227
protein targeting to mitochondrion	Gene Ontology	GO:0006626	1	26	0.026808	0.0654658	25793	http://amigo.geneontology.org/amigo/term/GO:0006626
protein modification process	Gene Ontology	GO:0036211	3	643	0.0269748	0.0656354	81858|55437|25793	http://amigo.geneontology.org/amigo/term/GO:0036211
cell cycle G2/M phase transition	Gene Ontology	GO:0044839	1	27	0.0277873	0.0666499	10133	http://amigo.geneontology.org/amigo/term/GO:0044839
organ growth	Gene Ontology	GO:0035265	1	27	0.0277873	0.0666499	8531	http://amigo.geneontology.org/amigo/term/GO:0035265
ribosome	Gene Ontology	GO:0005840	1	27	0.0277873	0.0666499	7311	http://amigo.geneontology.org/amigo/term/GO:0005840
sodium ion transmembrane transporter activity	Gene Ontology	GO:0015081	1	27	0.0277873	0.0666499	6535	http://amigo.geneontology.org/amigo/term/GO:0015081
adenyl ribonucleotide binding	Gene Ontology	GO:0032559	2	259	0.0283898	0.0677903	997|55437	http://amigo.geneontology.org/amigo/term/GO:0032559
positive regulation of hemopoiesis	Gene Ontology	GO:1903708	1	28	0.0287656	0.0677903	54997	http://amigo.geneontology.org/amigo/term/GO:1903708
regulation of extrinsic apoptotic signaling pathway	Gene Ontology	GO:2001236	1	28	0.0287656	0.0677903	55437	http://amigo.geneontology.org/amigo/term/GO:2001236
response to interferon-gamma	Gene Ontology	GO:0034341	1	28	0.0287656	0.0677903	6622	http://amigo.geneontology.org/amigo/term/GO:0034341
regulation of intrinsic apoptotic signaling pathway	Gene Ontology	GO:2001242	1	28	0.0287656	0.0677903	598	http://amigo.geneontology.org/amigo/term/GO:2001242
regulation of sequestering of calcium ion	Gene Ontology	GO:0051282	1	29	0.029743	0.0688894	6622	http://amigo.geneontology.org/amigo/term/GO:0051282
structural constituent of ribosome	Gene Ontology	GO:0003735	1	29	0.029743	0.0688894	51629	http://amigo.geneontology.org/amigo/term/GO:0003735
regulation of ion transmembrane transporter activity	Gene Ontology	GO:0032412	1	29	0.029743	0.0688894	54997	http://amigo.geneontology.org/amigo/term/GO:0032412
negative regulation of defense response	Gene Ontology	GO:0031348	1	29	0.029743	0.0688894	81858	http://amigo.geneontology.org/amigo/term/GO:0031348
regulation of mRNA catabolic process	Gene Ontology	GO:0061013	1	29	0.029743	0.0688894	7311	http://amigo.geneontology.org/amigo/term/GO:0061013
transferase activity, transferring phosphorus-containing groups	Gene Ontology	GO:0016772	2	269	0.0304203	0.0692473	54997|25793	http://amigo.geneontology.org/amigo/term/GO:0016772
response to chemical	Gene Ontology	GO:0042221	3	676	0.0306324	0.0692473	3043|51094|3039	http://amigo.geneontology.org/amigo/term/GO:0042221
positive regulation of intracellular protein transport	Gene Ontology	GO:0090316	1	30	0.0307195	0.0692473	51024	http://amigo.geneontology.org/amigo/term/GO:0090316
protein localization to mitochondrion	Gene Ontology	GO:0070585	1	30	0.0307195	0.0692473	51024	http://amigo.geneontology.org/amigo/term/GO:0070585
actin polymerization or depolymerization	Gene Ontology	GO:0008154	1	30	0.0307195	0.0692473	7111	http://amigo.geneontology.org/amigo/term/GO:0008154
regulation of microtubule-based process	Gene Ontology	GO:0032886	1	30	0.0307195	0.0692473	6622	http://amigo.geneontology.org/amigo/term/GO:0032886
activation of MAPK activity	Gene Ontology	GO:0000187	1	30	0.0307195	0.0692473	7311	http://amigo.geneontology.org/amigo/term/GO:0000187
regulation of transporter activity	Gene Ontology	GO:0032409	1	30	0.0307195	0.0692473	54997	http://amigo.geneontology.org/amigo/term/GO:0032409
negative regulation of mitotic cell cycle	Gene Ontology	GO:0045930	1	31	0.031695	0.0707364	4303	http://amigo.geneontology.org/amigo/term/GO:0045930
regulation of response to cytokine stimulus	Gene Ontology	GO:0060759	1	31	0.031695	0.0707364	81858	http://amigo.geneontology.org/amigo/term/GO:0060759
reactive oxygen species metabolic process	Gene Ontology	GO:0072593	1	31	0.031695	0.0707364	3040	http://amigo.geneontology.org/amigo/term/GO:0072593
organic cyclic compound biosynthetic process	Gene Ontology	GO:1901362	3	689	0.0321421	0.0714975	4303|6622|51629	http://amigo.geneontology.org/amigo/term/GO:1901362
receptor metabolic process	Gene Ontology	GO:0043112	1	32	0.0326695	0.0719583	6622	http://amigo.geneontology.org/amigo/term/GO:0043112
cell junction assembly	Gene Ontology	GO:0034329	1	32	0.0326695	0.0719583	2039	http://amigo.geneontology.org/amigo/term/GO:0034329
antigen processing and presentation of exogenous peptide antigen	Gene Ontology	GO:0002478	1	32	0.0326695	0.0719583	83547	http://amigo.geneontology.org/amigo/term/GO:0002478
positive regulation of signal transduction	Gene Ontology	GO:0009967	2	284	0.0335713	0.0729113	7311|2039	http://amigo.geneontology.org/amigo/term/GO:0009967
cell cycle arrest	Gene Ontology	GO:0007050	1	33	0.0336431	0.0729113	7311	http://amigo.geneontology.org/amigo/term/GO:0007050
sulfur compound biosynthetic process	Gene Ontology	GO:0044272	1	33	0.0336431	0.0729113	3029	http://amigo.geneontology.org/amigo/term/GO:0044272
regulation of transmembrane receptor protein serine/threonine kinase signaling pathway	Gene Ontology	GO:0090092	1	33	0.0336431	0.0729113	7311	http://amigo.geneontology.org/amigo/term/GO:0090092
protein transport	Gene Ontology	GO:0015031	2	285	0.0337858	0.072986	7311|55437	http://amigo.geneontology.org/amigo/term/GO:0015031
antigen processing and presentation	Gene Ontology	GO:0019882	1	34	0.0346157	0.0743024	83547	http://amigo.geneontology.org/amigo/term/GO:0019882
I-kappaB kinase/NF-kappaB signaling	Gene Ontology	GO:0007249	1	34	0.0346157	0.0743024	10133	http://amigo.geneontology.org/amigo/term/GO:0007249
DNA biosynthetic process	Gene Ontology	GO:0071897	1	35	0.0355873	0.0754273	7311	http://amigo.geneontology.org/amigo/term/GO:0071897
protein polyubiquitination	Gene Ontology	GO:0000209	1	35	0.0355873	0.0754273	81858	http://amigo.geneontology.org/amigo/term/GO:0000209
ribonucleotide biosynthetic process	Gene Ontology	GO:0009260	1	35	0.0355873	0.0754273	6622	http://amigo.geneontology.org/amigo/term/GO:0009260
germ cell development	Gene Ontology	GO:0007281	1	35	0.0355873	0.0754273	598	http://amigo.geneontology.org/amigo/term/GO:0007281
positive regulation of intracellular transport	Gene Ontology	GO:0032388	1	36	0.036558	0.0767605	51024	http://amigo.geneontology.org/amigo/term/GO:0032388
cellular response to environmental stimulus	Gene Ontology	GO:0104004	1	36	0.036558	0.0767605	598	http://amigo.geneontology.org/amigo/term/GO:0104004
phospholipase activity	Gene Ontology	GO:0004620	1	36	0.036558	0.0767605	6622	http://amigo.geneontology.org/amigo/term/GO:0004620
drug binding	Gene Ontology	GO:0008144	2	300	0.0370673	0.0775881	997|3039	http://amigo.geneontology.org/amigo/term/GO:0008144
organonitrogen compound biosynthetic process	Gene Ontology	GO:1901566	2	301	0.0372903	0.0778132	2623|7311	http://amigo.geneontology.org/amigo/term/GO:1901566
apoptotic process	Gene Ontology	GO:0006915	2	302	0.0375138	0.0778269	81858|51024	http://amigo.geneontology.org/amigo/term/GO:0006915
positive regulation of peptidase activity	Gene Ontology	GO:0010952	1	37	0.0375278	0.0778269	6622	http://amigo.geneontology.org/amigo/term/GO:0010952
extracellular region	Gene Ontology	GO:0005576	3	736	0.0379224	0.0784039	80700|8991|7311	http://amigo.geneontology.org/amigo/term/GO:0005576
system process	Gene Ontology	GO:0003008	2	309	0.0390931	0.0803597	7111|3043	http://amigo.geneontology.org/amigo/term/GO:0003008
Golgi subcompartment	Gene Ontology	GO:0098791	1	39	0.0394645	0.0803597	10133	http://amigo.geneontology.org/amigo/term/GO:0098791
negative regulation of cell adhesion	Gene Ontology	GO:0007162	1	39	0.0394645	0.0803597	2039	http://amigo.geneontology.org/amigo/term/GO:0007162
positive regulation of cytosolic calcium ion concentration	Gene Ontology	GO:0007204	1	39	0.0394645	0.0803597	6622	http://amigo.geneontology.org/amigo/term/GO:0007204
negative regulation of organelle organization	Gene Ontology	GO:0010639	1	40	0.0404314	0.0811034	2039	http://amigo.geneontology.org/amigo/term/GO:0010639
ubiquitin protein ligase binding	Gene Ontology	GO:0031625	1	40	0.0404314	0.0811034	997	http://amigo.geneontology.org/amigo/term/GO:0031625
sodium ion transport	Gene Ontology	GO:0006814	1	40	0.0404314	0.0811034	54997	http://amigo.geneontology.org/amigo/term/GO:0006814
ribose phosphate biosynthetic process	Gene Ontology	GO:0046390	1	40	0.0404314	0.0811034	2987	http://amigo.geneontology.org/amigo/term/GO:0046390
positive regulation of cellular protein localization	Gene Ontology	GO:1903829	1	41	0.0413973	0.0815842	51024	http://amigo.geneontology.org/amigo/term/GO:1903829
receptor-mediated endocytosis	Gene Ontology	GO:0006898	1	41	0.0413973	0.0815842	3039	http://amigo.geneontology.org/amigo/term/GO:0006898
development of primary sexual characteristics	Gene Ontology	GO:0045137	1	41	0.0413973	0.0815842	598	http://amigo.geneontology.org/amigo/term/GO:0045137
monosaccharide metabolic process	Gene Ontology	GO:0005996	1	41	0.0413973	0.0815842	51094	http://amigo.geneontology.org/amigo/term/GO:0005996
protein folding	Gene Ontology	GO:0006457	1	41	0.0413973	0.0815842	55831	http://amigo.geneontology.org/amigo/term/GO:0006457
positive regulation of cellular process	Gene Ontology	GO:0048522	3	768	0.0421443	0.0825209	84333|6622|3039	http://amigo.geneontology.org/amigo/term/GO:0048522
ribosome biogenesis	Gene Ontology	GO:0042254	1	42	0.0423623	0.0825209	7311	http://amigo.geneontology.org/amigo/term/GO:0042254
peptidyl-serine phosphorylation	Gene Ontology	GO:0018105	1	42	0.0423623	0.0825209	2039	http://amigo.geneontology.org/amigo/term/GO:0018105
distal axon	Gene Ontology	GO:0150034	1	43	0.0433264	0.0835241	6622	http://amigo.geneontology.org/amigo/term/GO:0150034
regulation of carbohydrate metabolic process	Gene Ontology	GO:0006109	1	43	0.0433264	0.0835241	51094	http://amigo.geneontology.org/amigo/term/GO:0006109
molecular adaptor activity	Gene Ontology	GO:0060090	1	43	0.0433264	0.0835241	10133	http://amigo.geneontology.org/amigo/term/GO:0060090
negative regulation of biological process	Gene Ontology	GO:0048519	3	777	0.0433731	0.0835241	4303|83547|997	http://amigo.geneontology.org/amigo/term/GO:0048519
lytic vacuole membrane	Gene Ontology	GO:0098852	1	44	0.0442895	0.0848044	7311	http://amigo.geneontology.org/amigo/term/GO:0098852
postsynapse	Gene Ontology	GO:0098794	1	44	0.0442895	0.0848044	81858	http://amigo.geneontology.org/amigo/term/GO:0098794
positive regulation of response to stimulus	Gene Ontology	GO:0048584	2	333	0.0446963	0.0853407	7311|29086	http://amigo.geneontology.org/amigo/term/GO:0048584
positive regulation of MAP kinase activity	Gene Ontology	GO:0043406	1	45	0.0452517	0.0856732	7311	http://amigo.geneontology.org/amigo/term/GO:0043406
signal transduction by p53 class mediator	Gene Ontology	GO:0072331	1	45	0.0452517	0.0856732	7311	http://amigo.geneontology.org/amigo/term/GO:0072331
activation of protein kinase activity	Gene Ontology	GO:0032147	1	45	0.0452517	0.0856732	55437	http://amigo.geneontology.org/amigo/term/GO:0032147
cellular response to abiotic stimulus	Gene Ontology	GO:0071214	1	46	0.0462129	0.087248	8531	http://amigo.geneontology.org/amigo/term/GO:0071214
regulation of innate immune response	Gene Ontology	GO:0045088	1	47	0.0471732	0.0880741	7311	http://amigo.geneontology.org/amigo/term/GO:0045088
establishment of protein localization to membrane	Gene Ontology	GO:0090150	1	47	0.0471732	0.0880741	2039	http://amigo.geneontology.org/amigo/term/GO:0090150
rRNA processing	Gene Ontology	GO:0006364	1	47	0.0471732	0.0880741	7311	http://amigo.geneontology.org/amigo/term/GO:0006364
cell junction organization	Gene Ontology	GO:0034330	1	47	0.0471732	0.0880741	2039	http://amigo.geneontology.org/amigo/term/GO:0034330
regulation of developmental process	Gene Ontology	GO:0050793	2	344	0.0473588	0.0881763	2623|51024	http://amigo.geneontology.org/amigo/term/GO:0050793
mitochondrion disassembly	Gene Ontology	GO:0061726	1	48	0.0481326	0.0891246	25793	http://amigo.geneontology.org/amigo/term/GO:0061726
RNA catabolic process	Gene Ontology	GO:0006401	1	48	0.0481326	0.0891246	7311	http://amigo.geneontology.org/amigo/term/GO:0006401
regulation of catalytic activity	Gene Ontology	GO:0050790	2	351	0.0490829	0.0896675	6622|51024	http://amigo.geneontology.org/amigo/term/GO:0050790
response to antibiotic	Gene Ontology	GO:0046677	1	49	0.049091	0.0896675	598	http://amigo.geneontology.org/amigo/term/GO:0046677
alcohol metabolic process	Gene Ontology	GO:0006066	1	49	0.049091	0.0896675	6622	http://amigo.geneontology.org/amigo/term/GO:0006066
lysosomal membrane	Gene Ontology	GO:0005765	1	49	0.049091	0.0896675	7311	http://amigo.geneontology.org/amigo/term/GO:0005765
peptidyl-serine modification	Gene Ontology	GO:0018209	1	49	0.049091	0.0896675	2039	http://amigo.geneontology.org/amigo/term/GO:0018209
regulation of intracellular protein transport	Gene Ontology	GO:0033157	1	50	0.0500484	0.0911693	51024	http://amigo.geneontology.org/amigo/term/GO:0033157
cellular localization	Gene Ontology	GO:0051641	2	360	0.0513332	0.0930068	7311|6622	http://amigo.geneontology.org/amigo/term/GO:0051641
membrane-bounded organelle	Gene Ontology	GO:0043227	5	2030	0.0518699	0.0933904	2623|84333|3039|51629|2039	http://amigo.geneontology.org/amigo/term/GO:0043227
positive regulation of cell adhesion	Gene Ontology	GO:0045785	1	52	0.0519605	0.0933904	2039	http://amigo.geneontology.org/amigo/term/GO:0045785
endomembrane system organization	Gene Ontology	GO:0010256	1	52	0.0519605	0.0933904	10133	http://amigo.geneontology.org/amigo/term/GO:0010256
response to external stimulus	Gene Ontology	GO:0009605	2	366	0.0528538	0.0941025	6622|2039	http://amigo.geneontology.org/amigo/term/GO:0009605
muscle tissue development	Gene Ontology	GO:0060537	1	53	0.0529152	0.0941025	8531	http://amigo.geneontology.org/amigo/term/GO:0060537
negative regulation of protein phosphorylation	Gene Ontology	GO:0001933	1	53	0.0529152	0.0941025	6622	http://amigo.geneontology.org/amigo/term/GO:0001933
neuron death	Gene Ontology	GO:0070997	1	53	0.0529152	0.0941025	6622	http://amigo.geneontology.org/amigo/term/GO:0070997
positive regulation of biological process	Gene Ontology	GO:0048518	3	845	0.0532351	0.0944223	2623|7311|3040	http://amigo.geneontology.org/amigo/term/GO:0048518
immune response-activating cell surface receptor signaling pathway	Gene Ontology	GO:0002429	1	54	0.0538689	0.094798	7311	http://amigo.geneontology.org/amigo/term/GO:0002429
enzyme inhibitor activity	Gene Ontology	GO:0004857	1	54	0.0538689	0.094798	54997	http://amigo.geneontology.org/amigo/term/GO:0004857
anatomical structure homeostasis	Gene Ontology	GO:0060249	1	54	0.0538689	0.094798	2623	http://amigo.geneontology.org/amigo/term/GO:0060249
regulation of protein catabolic process	Gene Ontology	GO:0042176	1	55	0.0548217	0.0959735	83547	http://amigo.geneontology.org/amigo/term/GO:0042176
nucleotide biosynthetic process	Gene Ontology	GO:0009165	1	55	0.0548217	0.0959735	6622	http://amigo.geneontology.org/amigo/term/GO:0009165
regulation of cellular protein metabolic process	Gene Ontology	GO:0032268	2	377	0.0556833	0.0972294	2039|25793	http://amigo.geneontology.org/amigo/term/GO:0032268
protein localization to membrane	Gene Ontology	GO:0072657	1	57	0.0567244	0.0982835	2039	http://amigo.geneontology.org/amigo/term/GO:0072657
purine-containing compound metabolic process	Gene Ontology	GO:0072521	1	57	0.0567244	0.0982835	6622	http://amigo.geneontology.org/amigo/term/GO:0072521
response to molecule of bacterial origin	Gene Ontology	GO:0002237	1	57	0.0567244	0.0982835	6622	http://amigo.geneontology.org/amigo/term/GO:0002237
macromolecule biosynthetic process	Gene Ontology	GO:0009059	3	869	0.0569553	0.0984305	4303|54997|212	http://amigo.geneontology.org/amigo/term/GO:0009059
regulation of DNA-binding transcription factor activity	Gene Ontology	GO:0051090	1	58	0.0576744	0.0989123	4601	http://amigo.geneontology.org/amigo/term/GO:0051090
response to metal ion	Gene Ontology	GO:0010038	1	58	0.0576744	0.0989123	2039	http://amigo.geneontology.org/amigo/term/GO:0010038
second-messenger-mediated signaling	Gene Ontology	GO:0019932	1	58	0.0576744	0.0989123	51024	http://amigo.geneontology.org/amigo/term/GO:0019932
nucleoside phosphate binding	Gene Ontology	GO:1901265	2	388	0.0585656	0.100031	2987|55437	http://amigo.geneontology.org/amigo/term/GO:1901265
anion transmembrane transport	Gene Ontology	GO:0098656	1	59	0.0586234	0.100031	6535	http://amigo.geneontology.org/amigo/term/GO:0098656
purine ribonucleotide metabolic process	Gene Ontology	GO:0009150	1	60	0.0595716	0.101392	6622	http://amigo.geneontology.org/amigo/term/GO:0009150
negative regulation of transport	Gene Ontology	GO:0051051	1	61	0.0605187	0.102487	2039	http://amigo.geneontology.org/amigo/term/GO:0051051
positive regulation of cell cycle	Gene Ontology	GO:0045787	1	61	0.0605187	0.102487	4303	http://amigo.geneontology.org/amigo/term/GO:0045787
negative regulation of metabolic process	Gene Ontology	GO:0009892	2	402	0.0623079	0.105161	8531|10133	http://amigo.geneontology.org/amigo/term/GO:0009892
regulation of cellular component size	Gene Ontology	GO:0032535	1	63	0.0624103	0.105161	7111	http://amigo.geneontology.org/amigo/term/GO:0032535
regulation of membrane potential	Gene Ontology	GO:0042391	1	64	0.0633547	0.106486	598	http://amigo.geneontology.org/amigo/term/GO:0042391
nucleobase-containing compound metabolic process	Gene Ontology	GO:0006139	3	933	0.0674679	0.113118	54997|2987|84333	http://amigo.geneontology.org/amigo/term/GO:0006139
glycoprotein metabolic process	Gene Ontology	GO:0009100	1	69	0.0680628	0.11355	2623	http://amigo.geneontology.org/amigo/term/GO:0009100
positive regulation of MAPK cascade	Gene Ontology	GO:0043410	1	71	0.0699396	0.115821	7311	http://amigo.geneontology.org/amigo/term/GO:0043410
DNA repair	Gene Ontology	GO:0006281	1	71	0.0699396	0.115821	7311	http://amigo.geneontology.org/amigo/term/GO:0006281
ribonucleoprotein complex biogenesis	Gene Ontology	GO:0022613	1	71	0.0699396	0.115821	7311	http://amigo.geneontology.org/amigo/term/GO:0022613
ion binding	Gene Ontology	GO:0043167	3	962	0.0725073	0.118435	212|3039|3029	http://amigo.geneontology.org/amigo/term/GO:0043167
monovalent inorganic cation transport	Gene Ontology	GO:0015672	1	74	0.0727478	0.118435	6535	http://amigo.geneontology.org/amigo/term/GO:0015672
mitotic cell cycle phase transition	Gene Ontology	GO:0044772	1	74	0.0727478	0.118435	7311	http://amigo.geneontology.org/amigo/term/GO:0044772
negative regulation of phosphorylation	Gene Ontology	GO:0042326	1	74	0.0727478	0.118435	2039	http://amigo.geneontology.org/amigo/term/GO:0042326
regulation of leukocyte activation	Gene Ontology	GO:0002694	1	74	0.0727478	0.118435	6622	http://amigo.geneontology.org/amigo/term/GO:0002694
primary metabolic process	Gene Ontology	GO:0044238	4	1578	0.0734102	0.119093	2623|51094|2039|84333	http://amigo.geneontology.org/amigo/term/GO:0044238
leukocyte differentiation	Gene Ontology	GO:0002521	1	75	0.0736821	0.119093	25793	http://amigo.geneontology.org/amigo/term/GO:0002521
extracellular organelle	Gene Ontology	GO:0043230	2	444	0.0740046	0.119328	3040|3029	http://amigo.geneontology.org/amigo/term/GO:0043230
actin cytoskeleton	Gene Ontology	GO:0015629	1	76	0.0746154	0.119456	6622	http://amigo.geneontology.org/amigo/term/GO:0015629
organic anion transport	Gene Ontology	GO:0015711	1	76	0.0746154	0.119456	3043	http://amigo.geneontology.org/amigo/term/GO:0015711
metal ion transmembrane transporter activity	Gene Ontology	GO:0046873	1	77	0.0755478	0.120093	54997	http://amigo.geneontology.org/amigo/term/GO:0046873
positive regulation of cellular component movement	Gene Ontology	GO:0051272	1	77	0.0755478	0.120093	2039	http://amigo.geneontology.org/amigo/term/GO:0051272
response to toxic substance	Gene Ontology	GO:0009636	1	77	0.0755478	0.120093	598	http://amigo.geneontology.org/amigo/term/GO:0009636
regulation of anatomical structure size	Gene Ontology	GO:0090066	1	78	0.0764793	0.121244	83547	http://amigo.geneontology.org/amigo/term/GO:0090066
intracellular membrane-bounded organelle	Gene Ontology	GO:0043231	4	1606	0.0772126	0.121244	573|84333|84164|6622	http://amigo.geneontology.org/amigo/term/GO:0043231
cytokine-mediated signaling pathway	Gene Ontology	GO:0019221	1	79	0.0774099	0.121244	7311	http://amigo.geneontology.org/amigo/term/GO:0019221
import into cell	Gene Ontology	GO:0098657	1	79	0.0774099	0.121244	3039	http://amigo.geneontology.org/amigo/term/GO:0098657
multi-organism process	Gene Ontology	GO:0051704	2	456	0.0774684	0.121244	7311|6622	http://amigo.geneontology.org/amigo/term/GO:0051704
organic substance biosynthetic process	Gene Ontology	GO:1901576	3	990	0.0775312	0.121244	8531|6622|3029	http://amigo.geneontology.org/amigo/term/GO:1901576
positive regulation of cellular metabolic process	Gene Ontology	GO:0031325	2	461	0.0789269	0.123141	4303|54997	http://amigo.geneontology.org/amigo/term/GO:0031325
cell communication	Gene Ontology	GO:0007154	3	1003	0.0799156	0.123984	81858|51094|55437	http://amigo.geneontology.org/amigo/term/GO:0007154
heart development	Gene Ontology	GO:0007507	1	82	0.0801962	0.123984	2623	http://amigo.geneontology.org/amigo/term/GO:0007507
small molecule binding	Gene Ontology	GO:0036094	2	467	0.0806886	0.123984	3043|3045	http://amigo.geneontology.org/amigo/term/GO:0036094
lytic vacuole	Gene Ontology	GO:0000323	1	83	0.0811231	0.123984	7311	http://amigo.geneontology.org/amigo/term/GO:0000323
organophosphate biosynthetic process	Gene Ontology	GO:0090407	1	83	0.0811231	0.123984	6622	http://amigo.geneontology.org/amigo/term/GO:0090407
cellular ion homeostasis	Gene Ontology	GO:0006873	1	83	0.0811231	0.123984	51024	http://amigo.geneontology.org/amigo/term/GO:0006873
translation	Gene Ontology	GO:0006412	1	83	0.0811231	0.123984	7311	http://amigo.geneontology.org/amigo/term/GO:0006412
peptidyl-lysine modification	Gene Ontology	GO:0018205	1	83	0.0811231	0.123984	6622	http://amigo.geneontology.org/amigo/term/GO:0018205
sensory organ development	Gene Ontology	GO:0007423	1	84	0.0820491	0.125011	7111	http://amigo.geneontology.org/amigo/term/GO:0007423
response to organic substance	Gene Ontology	GO:0010033	2	472	0.0821661	0.125011	997|7311	http://amigo.geneontology.org/amigo/term/GO:0010033
ubiquitin-protein transferase activity	Gene Ontology	GO:0004842	1	87	0.0848217	0.128184	25793	http://amigo.geneontology.org/amigo/term/GO:0004842
wound healing	Gene Ontology	GO:0042060	1	87	0.0848217	0.128184	2623	http://amigo.geneontology.org/amigo/term/GO:0042060
monocarboxylic acid metabolic process	Gene Ontology	GO:0032787	1	87	0.0848217	0.128184	51094	http://amigo.geneontology.org/amigo/term/GO:0032787
anterograde trans-synaptic signaling	Gene Ontology	GO:0098916	1	88	0.0857441	0.128712	6622	http://amigo.geneontology.org/amigo/term/GO:0098916
ubiquitin-dependent protein catabolic process	Gene Ontology	GO:0006511	1	88	0.0857441	0.128712	25793	http://amigo.geneontology.org/amigo/term/GO:0006511
cell cycle phase transition	Gene Ontology	GO:0044770	1	88	0.0857441	0.128712	7311	http://amigo.geneontology.org/amigo/term/GO:0044770
response to bacterium	Gene Ontology	GO:0009617	1	89	0.0866656	0.129231	10133	http://amigo.geneontology.org/amigo/term/GO:0009617
phosphoric ester hydrolase activity	Gene Ontology	GO:0042578	1	89	0.0866656	0.129231	54997	http://amigo.geneontology.org/amigo/term/GO:0042578
organic cyclic compound catabolic process	Gene Ontology	GO:1901361	1	90	0.0875862	0.130029	8531	http://amigo.geneontology.org/amigo/term/GO:1901361
protein complex oligomerization	Gene Ontology	GO:0051259	1	90	0.0875862	0.130029	3039	http://amigo.geneontology.org/amigo/term/GO:0051259
organelle membrane	Gene Ontology	GO:0031090	2	493	0.0884631	0.130532	27090|2039	http://amigo.geneontology.org/amigo/term/GO:0031090
positive regulation of kinase activity	Gene Ontology	GO:0033674	1	91	0.0885059	0.130532	6622	http://amigo.geneontology.org/amigo/term/GO:0033674
perinuclear region of cytoplasm	Gene Ontology	GO:0048471	1	91	0.0885059	0.130532	10133	http://amigo.geneontology.org/amigo/term/GO:0048471
cellular response to organic cyclic compound	Gene Ontology	GO:0071407	1	92	0.0894246	0.131027	2039	http://amigo.geneontology.org/amigo/term/GO:0071407
transmembrane receptor protein tyrosine kinase signaling pathway	Gene Ontology	GO:0007169	1	92	0.0894246	0.131027	4303	http://amigo.geneontology.org/amigo/term/GO:0007169
organic hydroxy compound metabolic process	Gene Ontology	GO:1901615	1	92	0.0894246	0.131027	3029	http://amigo.geneontology.org/amigo/term/GO:1901615
protein kinase binding	Gene Ontology	GO:0019901	1	94	0.0912595	0.133136	25793	http://amigo.geneontology.org/amigo/term/GO:0019901
vacuole	Gene Ontology	GO:0005773	1	95	0.0921756	0.133893	83547	http://amigo.geneontology.org/amigo/term/GO:0005773
tissue morphogenesis	Gene Ontology	GO:0048729	1	95	0.0921756	0.133893	7311	http://amigo.geneontology.org/amigo/term/GO:0048729
carbohydrate derivative biosynthetic process	Gene Ontology	GO:1901137	1	96	0.0930907	0.134932	2987	http://amigo.geneontology.org/amigo/term/GO:1901137
cellular metabolic process	Gene Ontology	GO:0044237	4	1718	0.0934065	0.135099	84337|54997|51024|8531	http://amigo.geneontology.org/amigo/term/GO:0044237
anion transport	Gene Ontology	GO:0006820	1	99	0.0958308	0.138013	3043	http://amigo.geneontology.org/amigo/term/GO:0006820
regulation of cell migration	Gene Ontology	GO:0030334	1	99	0.0958308	0.138013	2039	http://amigo.geneontology.org/amigo/term/GO:0030334
lymphocyte activation	Gene Ontology	GO:0046649	1	101	0.0976531	0.140039	25793	http://amigo.geneontology.org/amigo/term/GO:0046649
ion homeostasis	Gene Ontology	GO:0050801	1	102	0.0985629	0.140644	51024	http://amigo.geneontology.org/amigo/term/GO:0050801
regulation of cell adhesion	Gene Ontology	GO:0030155	1	102	0.0985629	0.140644	54997	http://amigo.geneontology.org/amigo/term/GO:0030155
multicellular organismal process	Gene Ontology	GO:0032501	3	1100	0.0987014	0.140644	2623|6622|598	http://amigo.geneontology.org/amigo/term/GO:0032501
actin cytoskeleton organization	Gene Ontology	GO:0030036	1	105	0.101287	0.144024	2039	http://amigo.geneontology.org/amigo/term/GO:0030036
cellular chemical homeostasis	Gene Ontology	GO:0055082	1	109	0.104906	0.148544	51024	http://amigo.geneontology.org/amigo/term/GO:0055082
positive regulation of immune response	Gene Ontology	GO:0050778	1	109	0.104906	0.148544	7311	http://amigo.geneontology.org/amigo/term/GO:0050778
regulation of proteolysis	Gene Ontology	GO:0030162	1	110	0.105809	0.149356	6622	http://amigo.geneontology.org/amigo/term/GO:0030162
regulation of nucleic acid-templated transcription	Gene Ontology	GO:1903506	2	549	0.105923	0.149356	84337|84164	http://amigo.geneontology.org/amigo/term/GO:1903506
regulation of cell motility	Gene Ontology	GO:2000145	1	113	0.108512	0.152369	2039	http://amigo.geneontology.org/amigo/term/GO:2000145
mitotic cell cycle process	Gene Ontology	GO:1903047	1	115	0.110309	0.15425	10133	http://amigo.geneontology.org/amigo/term/GO:1903047
transferase complex	Gene Ontology	GO:1990234	1	115	0.110309	0.15425	25793	http://amigo.geneontology.org/amigo/term/GO:1990234
cellular response to growth factor stimulus	Gene Ontology	GO:0071363	1	116	0.111206	0.155183	7311	http://amigo.geneontology.org/amigo/term/GO:0071363
mitochondrion organization	Gene Ontology	GO:0007005	1	117	0.112103	0.15611	51024	http://amigo.geneontology.org/amigo/term/GO:0007005
symbiotic process	Gene Ontology	GO:0044403	1	120	0.114787	0.159519	598	http://amigo.geneontology.org/amigo/term/GO:0044403
head development	Gene Ontology	GO:0060322	1	121	0.11568	0.159771	81858	http://amigo.geneontology.org/amigo/term/GO:0060322
oxidoreductase activity	Gene Ontology	GO:0016491	1	121	0.11568	0.159771	3043	http://amigo.geneontology.org/amigo/term/GO:0016491
hematopoietic or lymphoid organ development	Gene Ontology	GO:0048534	1	121	0.11568	0.159771	25793	http://amigo.geneontology.org/amigo/term/GO:0048534
negative regulation of transcription by RNA polymerase II	Gene Ontology	GO:0000122	1	123	0.117463	0.161902	7311	http://amigo.geneontology.org/amigo/term/GO:0000122
endosome	Gene Ontology	GO:0005768	1	126	0.120132	0.165063	10133	http://amigo.geneontology.org/amigo/term/GO:0005768
hydrolase activity	Gene Ontology	GO:0016787	2	593	0.120246	0.165063	573|51024	http://amigo.geneontology.org/amigo/term/GO:0016787
negative regulation of cell death	Gene Ontology	GO:0060548	1	127	0.121019	0.165787	573	http://amigo.geneontology.org/amigo/term/GO:0060548
synapse	Gene Ontology	GO:0045202	1	128	0.121906	0.166325	81858	http://amigo.geneontology.org/amigo/term/GO:0045202
cellular response to DNA damage stimulus	Gene Ontology	GO:0006974	1	130	0.123677	0.167723	4303	http://amigo.geneontology.org/amigo/term/GO:0006974
anatomical structure formation involved in morphogenesis	Gene Ontology	GO:0048646	1	130	0.123677	0.167723	2623	http://amigo.geneontology.org/amigo/term/GO:0048646
positive regulation of intracellular signal transduction	Gene Ontology	GO:1902533	1	131	0.124561	0.168255	51024	http://amigo.geneontology.org/amigo/term/GO:1902533
non-membrane-bounded organelle	Gene Ontology	GO:0043228	2	606	0.124569	0.168255	598|2995	http://amigo.geneontology.org/amigo/term/GO:0043228
cellular response to cytokine stimulus	Gene Ontology	GO:0071345	1	132	0.125445	0.168762	997	http://amigo.geneontology.org/amigo/term/GO:0071345
nucleic acid-templated transcription	Gene Ontology	GO:0097659	2	612	0.126577	0.169945	84164|7311	http://amigo.geneontology.org/amigo/term/GO:0097659
negative regulation of cellular protein metabolic process	Gene Ontology	GO:0032269	1	134	0.127209	0.170455	2039	http://amigo.geneontology.org/amigo/term/GO:0032269
metal ion transport	Gene Ontology	GO:0030001	1	135	0.12809	0.171294	6622	http://amigo.geneontology.org/amigo/term/GO:0030001
response to organic cyclic compound	Gene Ontology	GO:0014070	1	136	0.128969	0.171604	598	http://amigo.geneontology.org/amigo/term/GO:0014070
calcium ion binding	Gene Ontology	GO:0005509	1	137	0.129848	0.171604	6622	http://amigo.geneontology.org/amigo/term/GO:0005509
response to cytokine	Gene Ontology	GO:0034097	1	137	0.129848	0.171604	51094	http://amigo.geneontology.org/amigo/term/GO:0034097
response to lipid	Gene Ontology	GO:0033993	1	137	0.129848	0.171604	54997	http://amigo.geneontology.org/amigo/term/GO:0033993
cellular protein-containing complex assembly	Gene Ontology	GO:0034622	1	141	0.133356	0.174867	7311	http://amigo.geneontology.org/amigo/term/GO:0034622
regulation of catabolic process	Gene Ontology	GO:0009894	1	141	0.133356	0.174867	6622	http://amigo.geneontology.org/amigo/term/GO:0009894
endomembrane system	Gene Ontology	GO:0012505	2	633	0.133666	0.174934	598|7311	http://amigo.geneontology.org/amigo/term/GO:0012505
cell activation	Gene Ontology	GO:0001775	1	142	0.134231	0.174993	3043	http://amigo.geneontology.org/amigo/term/GO:0001775
positive regulation of immune system process	Gene Ontology	GO:0002684	1	143	0.135104	0.175792	7311	http://amigo.geneontology.org/amigo/term/GO:0002684
cation binding	Gene Ontology	GO:0043169	2	641	0.136391	0.177124	3043|84333	http://amigo.geneontology.org/amigo/term/GO:0043169
secretion by cell	Gene Ontology	GO:0032940	1	147	0.138591	0.179635	6622	http://amigo.geneontology.org/amigo/term/GO:0032940
negative regulation of multicellular organismal process	Gene Ontology	GO:0051241	1	148	0.139461	0.179726	2623	http://amigo.geneontology.org/amigo/term/GO:0051241
positive regulation of phosphorylation	Gene Ontology	GO:0042327	1	148	0.139461	0.179726	2623	http://amigo.geneontology.org/amigo/term/GO:0042327
peptidase activity, acting on L-amino acid peptides	Gene Ontology	GO:0070011	1	148	0.139461	0.179726	6622	http://amigo.geneontology.org/amigo/term/GO:0070011
signal transduction by protein phosphorylation	Gene Ontology	GO:0023014	1	150	0.141197	0.18127	55437	http://amigo.geneontology.org/amigo/term/GO:0023014
metal ion binding	Gene Ontology	GO:0046872	2	657	0.141879	0.181799	81858|3045	http://amigo.geneontology.org/amigo/term/GO:0046872
nuclear outer membrane-endoplasmic reticulum membrane network	Gene Ontology	GO:0042175	1	152	0.14293	0.182108	6622	http://amigo.geneontology.org/amigo/term/GO:0042175
supramolecular polymer	Gene Ontology	GO:0099081	1	152	0.14293	0.182108	7111	http://amigo.geneontology.org/amigo/term/GO:0099081
regulation of biosynthetic process	Gene Ontology	GO:0009889	2	670	0.146373	0.184765	8531|84333	http://amigo.geneontology.org/amigo/term/GO:0009889
sequence-specific DNA binding	Gene Ontology	GO:0043565	1	156	0.146386	0.184765	4303	http://amigo.geneontology.org/amigo/term/GO:0043565
regulation of anatomical structure morphogenesis	Gene Ontology	GO:0022603	1	156	0.146386	0.184765	2039	http://amigo.geneontology.org/amigo/term/GO:0022603
regulation of gene expression	Gene Ontology	GO:0010468	2	671	0.14672	0.18484	8531|84164	http://amigo.geneontology.org/amigo/term/GO:0010468
cellular component morphogenesis	Gene Ontology	GO:0032989	1	157	0.147248	0.185159	51024	http://amigo.geneontology.org/amigo/term/GO:0032989
negative regulation of apoptotic process	Gene Ontology	GO:0043066	1	159	0.148969	0.186975	6622	http://amigo.geneontology.org/amigo/term/GO:0043066
cellular response to oxygen-containing compound	Gene Ontology	GO:1901701	1	161	0.150687	0.188429	51094	http://amigo.geneontology.org/amigo/term/GO:1901701
enzyme regulator activity	Gene Ontology	GO:0030234	1	161	0.150687	0.188429	54997	http://amigo.geneontology.org/amigo/term/GO:0030234
positive regulation of phosphorus metabolic process	Gene Ontology	GO:0010562	1	163	0.152402	0.18935	2623	http://amigo.geneontology.org/amigo/term/GO:0010562
response to stimulus	Gene Ontology	GO:0050896	3	1343	0.152548	0.18935	997|6535|7311	http://amigo.geneontology.org/amigo/term/GO:0050896
transport	Gene Ontology	GO:0006810	2	691	0.153697	0.190427	6622|51629	http://amigo.geneontology.org/amigo/term/GO:0006810
organelle envelope	Gene Ontology	GO:0031967	1	165	0.154113	0.190591	598	http://amigo.geneontology.org/amigo/term/GO:0031967
positive regulation of transport	Gene Ontology	GO:0051050	1	166	0.154967	0.191296	51024	http://amigo.geneontology.org/amigo/term/GO:0051050
cellular amide metabolic process	Gene Ontology	GO:0043603	1	167	0.155821	0.191648	7311	http://amigo.geneontology.org/amigo/term/GO:0043603
cation transmembrane transport	Gene Ontology	GO:0098655	1	167	0.155821	0.191648	54997	http://amigo.geneontology.org/amigo/term/GO:0098655
peptidase activity	Gene Ontology	GO:0008233	1	169	0.157525	0.19304	51024	http://amigo.geneontology.org/amigo/term/GO:0008233
protein modification by small protein conjugation or removal	Gene Ontology	GO:0070647	1	170	0.158376	0.193301	29086	http://amigo.geneontology.org/amigo/term/GO:0070647
cellular anatomical entity	Gene Ontology	GO:0110165	5	2864	0.158599	0.193301	4303|54997|80700|29086|10133	http://amigo.geneontology.org/amigo/term/GO:0110165
cellular macromolecule catabolic process	Gene Ontology	GO:0044265	1	173	0.160924	0.195076	7311	http://amigo.geneontology.org/amigo/term/GO:0044265
neuron projection	Gene Ontology	GO:0043005	1	173	0.160924	0.195076	81858	http://amigo.geneontology.org/amigo/term/GO:0043005
nucleobase-containing compound biosynthetic process	Gene Ontology	GO:0034654	2	714	0.161803	0.19579	7311|4601	http://amigo.geneontology.org/amigo/term/GO:0034654
chromosome organization	Gene Ontology	GO:0051276	1	178	0.165153	0.199486	6622	http://amigo.geneontology.org/amigo/term/GO:0051276
aromatic compound biosynthetic process	Gene Ontology	GO:0019438	2	727	0.16642	0.200656	54997|7311	http://amigo.geneontology.org/amigo/term/GO:0019438
cation transport	Gene Ontology	GO:0006812	1	184	0.170201	0.204657	54997	http://amigo.geneontology.org/amigo/term/GO:0006812
RNA metabolic process	Gene Ontology	GO:0016070	2	738	0.170345	0.204657	54997|7311	http://amigo.geneontology.org/amigo/term/GO:0016070
membrane protein complex	Gene Ontology	GO:0098796	1	186	0.171877	0.205399	6622	http://amigo.geneontology.org/amigo/term/GO:0098796
negative regulation of signaling	Gene Ontology	GO:0023057	1	186	0.171877	0.205399	598	http://amigo.geneontology.org/amigo/term/GO:0023057
negative regulation of RNA metabolic process	Gene Ontology	GO:0051253	1	188	0.17355	0.206301	8531	http://amigo.geneontology.org/amigo/term/GO:0051253
cellular lipid metabolic process	Gene Ontology	GO:0044255	1	188	0.17355	0.206301	27090	http://amigo.geneontology.org/amigo/term/GO:0044255
endoplasmic reticulum	Gene Ontology	GO:0005783	1	188	0.17355	0.206301	6622	http://amigo.geneontology.org/amigo/term/GO:0005783
negative regulation of RNA biosynthetic process	Gene Ontology	GO:1902679	1	192	0.176886	0.209896	4601	http://amigo.geneontology.org/amigo/term/GO:1902679
localization of cell	Gene Ontology	GO:0051674	1	197	0.181037	0.214444	2039	http://amigo.geneontology.org/amigo/term/GO:0051674
regulation of organelle organization	Gene Ontology	GO:0033043	1	203	0.185991	0.219926	598	http://amigo.geneontology.org/amigo/term/GO:0033043
whole membrane	Gene Ontology	GO:0098805	1	204	0.186814	0.220512	83547	http://amigo.geneontology.org/amigo/term/GO:0098805
cellular macromolecule biosynthetic process	Gene Ontology	GO:0034645	2	789	0.188747	0.222404	54997|51629	http://amigo.geneontology.org/amigo/term/GO:0034645
regulation of response to stress	Gene Ontology	GO:0080134	1	207	0.189278	0.222641	7311	http://amigo.geneontology.org/amigo/term/GO:0080134
biological adhesion	Gene Ontology	GO:0022610	1	210	0.191734	0.224746	54997	http://amigo.geneontology.org/amigo/term/GO:0022610
transporter activity	Gene Ontology	GO:0005215	1	210	0.191734	0.224746	3040	http://amigo.geneontology.org/amigo/term/GO:0005215
negative regulation of nucleobase-containing compound metabolic process	Gene Ontology	GO:0045934	1	212	0.193368	0.225875	2623	http://amigo.geneontology.org/amigo/term/GO:0045934
transition metal ion binding	Gene Ontology	GO:0046914	1	215	0.195812	0.228335	2623	http://amigo.geneontology.org/amigo/term/GO:0046914
reproduction	Gene Ontology	GO:0000003	1	216	0.196626	0.228727	8531	http://amigo.geneontology.org/amigo/term/GO:0000003
positive regulation of RNA metabolic process	Gene Ontology	GO:0051254	1	217	0.197438	0.228727	84333	http://amigo.geneontology.org/amigo/term/GO:0051254
negative regulation of macromolecule biosynthetic process	Gene Ontology	GO:0010558	1	217	0.197438	0.228727	7311	http://amigo.geneontology.org/amigo/term/GO:0010558
heterocyclic compound binding	Gene Ontology	GO:1901363	2	813	0.197506	0.228727	3043|4601	http://amigo.geneontology.org/amigo/term/GO:1901363
lipid metabolic process	Gene Ontology	GO:0006629	1	218	0.19825	0.229194	6622	http://amigo.geneontology.org/amigo/term/GO:0006629
positive regulation of RNA biosynthetic process	Gene Ontology	GO:1902680	1	219	0.199061	0.229345	4303	http://amigo.geneontology.org/amigo/term/GO:1902680
positive regulation of signaling	Gene Ontology	GO:0023056	1	227	0.205518	0.236381	7311	http://amigo.geneontology.org/amigo/term/GO:0023056
intrinsic component of membrane	Gene Ontology	GO:0031224	2	843	0.20853	0.239436	51094|51024	http://amigo.geneontology.org/amigo/term/GO:0031224
organic cyclic compound binding	Gene Ontology	GO:0097159	2	845	0.209267	0.239874	2623|212	http://amigo.geneontology.org/amigo/term/GO:0097159
response to endogenous stimulus	Gene Ontology	GO:0009719	1	234	0.211127	0.241596	598	http://amigo.geneontology.org/amigo/term/GO:0009719
positive regulation of transcription, DNA-templated	Gene Ontology	GO:0045893	1	236	0.212723	0.243009	4303	http://amigo.geneontology.org/amigo/term/GO:0045893
kinase activity	Gene Ontology	GO:0016301	1	241	0.216698	0.246713	25793	http://amigo.geneontology.org/amigo/term/GO:0016301
reproductive process	Gene Ontology	GO:0022414	1	241	0.216698	0.246713	598	http://amigo.geneontology.org/amigo/term/GO:0022414
regulation of phosphorus metabolic process	Gene Ontology	GO:0051174	1	243	0.218282	0.248098	55437	http://amigo.geneontology.org/amigo/term/GO:0051174
integral component of membrane	Gene Ontology	GO:0016021	2	871	0.218881	0.24836	51094|51629	http://amigo.geneontology.org/amigo/term/GO:0016021
signaling receptor activity	Gene Ontology	GO:0038023	1	246	0.220653	0.24995	51094	http://amigo.geneontology.org/amigo/term/GO:0038023
intracellular transport	Gene Ontology	GO:0046907	1	247	0.221442	0.250422	83547	http://amigo.geneontology.org/amigo/term/GO:0046907
cell-cell signaling	Gene Ontology	GO:0007267	1	249	0.223017	0.251781	2623	http://amigo.geneontology.org/amigo/term/GO:0007267
positive regulation of molecular function	Gene Ontology	GO:0044093	1	250	0.223803	0.252246	6622	http://amigo.geneontology.org/amigo/term/GO:0044093
immune response	Gene Ontology	GO:0006955	1	251	0.224589	0.252709	7311	http://amigo.geneontology.org/amigo/term/GO:0006955
plasma membrane bounded cell projection	Gene Ontology	GO:0120025	1	255	0.227724	0.255384	54997	http://amigo.geneontology.org/amigo/term/GO:0120025
regulation of cell population proliferation	Gene Ontology	GO:0042127	1	255	0.227724	0.255384	598	http://amigo.geneontology.org/amigo/term/GO:0042127
positive regulation of nucleobase-containing compound metabolic process	Gene Ontology	GO:0045935	1	257	0.229286	0.256709	7311	http://amigo.geneontology.org/amigo/term/GO:0045935
mitochondrion	Gene Ontology	GO:0005739	1	260	0.231625	0.258897	25793	http://amigo.geneontology.org/amigo/term/GO:0005739
tissue development	Gene Ontology	GO:0009888	1	262	0.23318	0.260204	7111	http://amigo.geneontology.org/amigo/term/GO:0009888
regulation of transport	Gene Ontology	GO:0051049	1	265	0.235507	0.262366	54997	http://amigo.geneontology.org/amigo/term/GO:0051049
cell cycle	Gene Ontology	GO:0007049	1	266	0.236281	0.262794	997	http://amigo.geneontology.org/amigo/term/GO:0007049
cellular component organization or biogenesis	Gene Ontology	GO:0071840	2	929	0.240468	0.267011	81858|3043	http://amigo.geneontology.org/amigo/term/GO:0071840
positive regulation of gene expression	Gene Ontology	GO:0010628	1	275	0.243213	0.269577	8531	http://amigo.geneontology.org/amigo/term/GO:0010628
ion transport	Gene Ontology	GO:0006811	1	276	0.24398	0.269577	3039	http://amigo.geneontology.org/amigo/term/GO:0006811
cell projection	Gene Ontology	GO:0042995	1	276	0.24398	0.269577	2039	http://amigo.geneontology.org/amigo/term/GO:0042995
signal transduction	Gene Ontology	GO:0007165	2	940	0.244579	0.269797	81858|8531	http://amigo.geneontology.org/amigo/term/GO:0007165
response to oxygen-containing compound	Gene Ontology	GO:1901700	1	278	0.24551	0.270382	3040	http://amigo.geneontology.org/amigo/term/GO:1901700
positive regulation of macromolecule biosynthetic process	Gene Ontology	GO:0010557	1	281	0.247801	0.272459	8531	http://amigo.geneontology.org/amigo/term/GO:0010557
intrinsic component of plasma membrane	Gene Ontology	GO:0031226	1	283	0.249324	0.273688	2995	http://amigo.geneontology.org/amigo/term/GO:0031226
peptide transport	Gene Ontology	GO:0015833	1	284	0.250084	0.274076	10133	http://amigo.geneontology.org/amigo/term/GO:0015833
programmed cell death	Gene Ontology	GO:0012501	1	289	0.253875	0.277779	598	http://amigo.geneontology.org/amigo/term/GO:0012501
regulation of cellular metabolic process	Gene Ontology	GO:0031323	2	969	0.255432	0.27903	8531|25793	http://amigo.geneontology.org/amigo/term/GO:0031323
ribonucleotide binding	Gene Ontology	GO:0032553	1	292	0.256141	0.279351	997	http://amigo.geneontology.org/amigo/term/GO:0032553
regulation of metabolic process	Gene Ontology	GO:0019222	2	974	0.257305	0.280168	8531|2039	http://amigo.geneontology.org/amigo/term/GO:0019222
establishment of protein localization	Gene Ontology	GO:0045184	1	295	0.2584	0.280906	2039	http://amigo.geneontology.org/amigo/term/GO:0045184
organic substance catabolic process	Gene Ontology	GO:1901575	1	297	0.259902	0.282084	83547	http://amigo.geneontology.org/amigo/term/GO:1901575
cellular catabolic process	Gene Ontology	GO:0044248	1	308	0.268111	0.290526	3029	http://amigo.geneontology.org/amigo/term/GO:0044248
positive regulation of biosynthetic process	Gene Ontology	GO:0009891	1	311	0.270335	0.292465	7311	http://amigo.geneontology.org/amigo/term/GO:0009891
cytoskeleton	Gene Ontology	GO:0005856	1	320	0.276966	0.299159	80700	http://amigo.geneontology.org/amigo/term/GO:0005856
nervous system development	Gene Ontology	GO:0007399	1	342	0.292929	0.315895	81858	http://amigo.geneontology.org/amigo/term/GO:0007399
carbohydrate derivative binding	Gene Ontology	GO:0097367	1	351	0.29936	0.322314	2987	http://amigo.geneontology.org/amigo/term/GO:0097367
cellular component assembly	Gene Ontology	GO:0022607	1	360	0.305734	0.327086	7311	http://amigo.geneontology.org/amigo/term/GO:0022607
phosphorylation	Gene Ontology	GO:0016310	1	360	0.305734	0.327086	55437	http://amigo.geneontology.org/amigo/term/GO:0016310
negative regulation of cellular metabolic process	Gene Ontology	GO:0031324	1	360	0.305734	0.327086	7311	http://amigo.geneontology.org/amigo/term/GO:0031324
regulation of protein metabolic process	Gene Ontology	GO:0051246	1	390	0.326574	0.348829	54997	http://amigo.geneontology.org/amigo/term/GO:0051246
cellular component biogenesis	Gene Ontology	GO:0044085	1	405	0.336765	0.359145	3040	http://amigo.geneontology.org/amigo/term/GO:0044085
immune system process	Gene Ontology	GO:0002376	1	410	0.340128	0.362159	2039	http://amigo.geneontology.org/amigo/term/GO:0002376
catabolic process	Gene Ontology	GO:0009056	1	417	0.344809	0.366564	598	http://amigo.geneontology.org/amigo/term/GO:0009056
regulation of signal transduction	Gene Ontology	GO:0009966	1	424	0.349458	0.37092	51024	http://amigo.geneontology.org/amigo/term/GO:0009966
negative regulation of macromolecule metabolic process	Gene Ontology	GO:0010605	1	427	0.35144	0.372438	4601	http://amigo.geneontology.org/amigo/term/GO:0010605
regulation of multicellular organismal process	Gene Ontology	GO:0051239	1	428	0.352099	0.372551	7311	http://amigo.geneontology.org/amigo/term/GO:0051239
positive regulation of nitrogen compound metabolic process	Gene Ontology	GO:0051173	1	436	0.357352	0.377516	84333	http://amigo.geneontology.org/amigo/term/GO:0051173
extracellular exosome	Gene Ontology	GO:0070062	1	445	0.363211	0.383105	3039	http://amigo.geneontology.org/amigo/term/GO:0070062
anion binding	Gene Ontology	GO:0043168	1	454	0.369018	0.388622	55437	http://amigo.geneontology.org/amigo/term/GO:0043168
transferase activity	Gene Ontology	GO:0016740	1	474	0.381739	0.401391	27090	http://amigo.geneontology.org/amigo/term/GO:0016740
animal organ development	Gene Ontology	GO:0048513	1	504	0.400352	0.419654	81858	http://amigo.geneontology.org/amigo/term/GO:0048513
extracellular vesicle	Gene Ontology	GO:1903561	1	514	0.406435	0.425368	3040	http://amigo.geneontology.org/amigo/term/GO:1903561
cytosol	Gene Ontology	GO:0005829	1	531	0.416637	0.434696	10133	http://amigo.geneontology.org/amigo/term/GO:0005829
organelle organization	Gene Ontology	GO:0006996	1	548	0.426668	0.444474	598	http://amigo.geneontology.org/amigo/term/GO:0006996
regulation of transcription, DNA-templated	Gene Ontology	GO:0006355	1	567	0.437681	0.455242	4303	http://amigo.geneontology.org/amigo/term/GO:0006355
intracellular non-membrane-bounded organelle	Gene Ontology	GO:0043232	1	569	0.438828	0.455732	7111	http://amigo.geneontology.org/amigo/term/GO:0043232
response to stress	Gene Ontology	GO:0006950	1	578	0.443962	0.460355	3039	http://amigo.geneontology.org/amigo/term/GO:0006950
regulation of RNA metabolic process	Gene Ontology	GO:0051252	1	582	0.446229	0.461995	84337	http://amigo.geneontology.org/amigo/term/GO:0051252
regulation of response to stimulus	Gene Ontology	GO:0048583	1	593	0.452418	0.467683	2039	http://amigo.geneontology.org/amigo/term/GO:0048583
transcription, DNA-templated	Gene Ontology	GO:0006351	1	599	0.455765	0.470422	4303	http://amigo.geneontology.org/amigo/term/GO:0006351
cellular developmental process	Gene Ontology	GO:0048869	1	601	0.456876	0.470848	51024	http://amigo.geneontology.org/amigo/term/GO:0048869
regulation of cellular biosynthetic process	Gene Ontology	GO:0031326	1	652	0.484476	0.49853	7311	http://amigo.geneontology.org/amigo/term/GO:0031326
vesicle	Gene Ontology	GO:0031982	1	667	0.492331	0.50584	83547	http://amigo.geneontology.org/amigo/term/GO:0031982
system development	Gene Ontology	GO:0048731	1	701	0.509705	0.522893	4303	http://amigo.geneontology.org/amigo/term/GO:0048731
heterocycle biosynthetic process	Gene Ontology	GO:0018130	1	707	0.51271	0.525177	2623	http://amigo.geneontology.org/amigo/term/GO:0018130
cellular protein metabolic process	Gene Ontology	GO:0044267	1	726	0.522109	0.533993	51024	http://amigo.geneontology.org/amigo/term/GO:0044267
regulation of biological process	Gene Ontology	GO:0050789	2	1778	0.539832	0.551283	598|7311	http://amigo.geneontology.org/amigo/term/GO:0050789
multicellular organism development	Gene Ontology	GO:0007275	1	802	0.557968	0.568942	7311	http://amigo.geneontology.org/amigo/term/GO:0007275
nucleic acid metabolic process	Gene Ontology	GO:0090304	1	811	0.562037	0.571414	54997	http://amigo.geneontology.org/amigo/term/GO:0090304
cell periphery	Gene Ontology	GO:0071944	1	812	0.562487	0.571414	51094	http://amigo.geneontology.org/amigo/term/GO:0071944
cellular nitrogen compound biosynthetic process	Gene Ontology	GO:0044271	1	813	0.562936	0.571414	7311	http://amigo.geneontology.org/amigo/term/GO:0044271
anatomical structure development	Gene Ontology	GO:0048856	1	868	0.586972	0.594916	81858	http://amigo.geneontology.org/amigo/term/GO:0048856
cellular aromatic compound metabolic process	Gene Ontology	GO:0006725	1	913	0.605675	0.61295	51629	http://amigo.geneontology.org/amigo/term/GO:0006725
cellular component organization	Gene Ontology	GO:0016043	1	936	0.614913	0.621366	3040	http://amigo.geneontology.org/amigo/term/GO:0016043
heterocycle metabolic process	Gene Ontology	GO:0046483	1	940	0.616498	0.622035	7311	http://amigo.geneontology.org/amigo/term/GO:0046483
regulation of macromolecule metabolic process	Gene Ontology	GO:0060255	1	957	0.623163	0.62782	84333	http://amigo.geneontology.org/amigo/term/GO:0060255
organic cyclic compound metabolic process	Gene Ontology	GO:1901360	1	971	0.628567	0.63232	2987	http://amigo.geneontology.org/amigo/term/GO:1901360
cellular biosynthetic process	Gene Ontology	GO:0044249	1	984	0.633518	0.63635	51629	http://amigo.geneontology.org/amigo/term/GO:0044249
binding	Gene Ontology	GO:0005488	2	2247	0.669199	0.671191	54997|4601	http://amigo.geneontology.org/amigo/term/GO:0005488
catalytic activity	Gene Ontology	GO:0003824	1	1162	0.695167	0.6962	2987	http://amigo.geneontology.org/amigo/term/GO:0003824
membrane	Gene Ontology	GO:0016020	1	1443	0.772486	0.772486	7111	http://amigo.geneontology.org/amigo/term/GO:0016020
--------------------
