# Supplementary material for: Identification of hub genes associated with adult acute myeloid leukemia progression through weighted gene co-expression network analysis
Source: Aging (Albany NY). 2021 Feb 11;13(4):5686–97. doi: 10.18632/aging.202493 (PMC7950274; doi:10.18632/aging.202493)
Supplement: Supplementary Table 4 [file aging-13-202493-s004.xls]

## Sheet: Supplementary Table 4
Supplementary Table 4. The results of GO and KEGG biofunctional analysis in red module.
##Databases: KEGG PATHWAY, Gene Ontology
##Statistical test method: hypergeometric test / Fisher's exact test
##FDR correction method: Benjamini and Hochberg
#Term	Database	ID	Input number	Background number	P-Value	Corrected P-Value	Input	Hyperlink
Th1 and Th2 cell differentiation	KEGG PATHWAY	hsa04658	8	92	1.5e-14	8.26e-12	IL2RB|STAT4|TBX21|CD3E|RUNX3|CD247|ZAP70|LCK	http://www.genome.jp/kegg-bin/show_pathway?hsa04658/hsa:919%09red/hsa:6775%09red/hsa:7535%09red/hsa:916%09red/hsa:3560%09red/hsa:30009%09red/hsa:864%09red/hsa:3932%09red
Natural killer cell mediated cytotoxicity	KEGG PATHWAY	hsa04650	8	131	2.22e-13	6.11e-11	GZMB|SH2D1B|NCR3|KLRK1|CD247|FASLG|ZAP70|LCK	http://www.genome.jp/kegg-bin/show_pathway?hsa04650/hsa:919%09red/hsa:7535%09red/hsa:3932%09red/hsa:22914%09red/hsa:259197%09red/hsa:3002%09red/hsa:356%09red/hsa:117157%09red
Th17 cell differentiation	KEGG PATHWAY	hsa04659	7	107	4.88e-12	8.94e-10	IL2RB|TBX21|IL21R|CD3E|CD247|ZAP70|LCK	http://www.genome.jp/kegg-bin/show_pathway?hsa04659/hsa:919%09red/hsa:7535%09red/hsa:3560%09red/hsa:30009%09red/hsa:916%09red/hsa:3932%09red/hsa:50615%09red
T cell receptor signaling pathway	KEGG PATHWAY	hsa04660	5	103	2.7e-08	3.71e-06	CD3E|CARD11|CD247|ZAP70|LCK	http://www.genome.jp/kegg-bin/show_pathway?hsa04660/hsa:84433%09red/hsa:919%09red/hsa:916%09red/hsa:7535%09red/hsa:3932%09red
PD-L1 expression and PD-1 checkpoint pathway in cancer	KEGG PATHWAY	hsa05235	4	89	9.81e-07	0.000107917	CD3E|CD247|ZAP70|LCK	http://www.genome.jp/kegg-bin/show_pathway?hsa05235/hsa:3932%09red/hsa:919%09red/hsa:916%09red/hsa:7535%09red
NF-kappa B signaling pathway	KEGG PATHWAY	hsa04064	4	100	1.54e-06	0.00013514	CARD11|ZAP70|CCL4|LCK	http://www.genome.jp/kegg-bin/show_pathway?hsa04064/hsa:84433%09red/hsa:6351%09red/hsa:7535%09red/hsa:3932%09red
Chagas disease (American trypanosomiasis)	KEGG PATHWAY	hsa05142	4	103	1.72e-06	0.00013514	CD247|FASLG|CD3E|PPP2R2B	http://www.genome.jp/kegg-bin/show_pathway?hsa05142/hsa:919%09red/hsa:5521%09red/hsa:916%09red/hsa:356%09red
Primary immunodeficiency	KEGG PATHWAY	hsa05340	3	37	4.6e-06	0.000316057	CD3E|ZAP70|LCK	http://www.genome.jp/kegg-bin/show_pathway?hsa05340/hsa:3932%09red/hsa:916%09red/hsa:7535%09red
Inflammatory bowel disease (IBD)	KEGG PATHWAY	hsa05321	3	65	2.3e-05	0.00140296	TBX21|IL21R|STAT4	http://www.genome.jp/kegg-bin/show_pathway?hsa05321/hsa:6775%09red/hsa:30009%09red/hsa:50615%09red
Cytokine-cytokine receptor interaction	KEGG PATHWAY	hsa04060	4	294	9.61e-05	0.0048027	IL2RB|IL21R|FASLG|CCL4	http://www.genome.jp/kegg-bin/show_pathway?hsa04060/hsa:3560%09red/hsa:6351%09red/hsa:50615%09red/hsa:356%09red
Measles	KEGG PATHWAY	hsa05162	3	138	0.000201133	0.00850945	IL2RB|FASLG|CD3E	http://www.genome.jp/kegg-bin/show_pathway?hsa05162/hsa:3560%09red/hsa:916%09red/hsa:356%09red
Jak-STAT signaling pathway	KEGG PATHWAY	hsa04630	3	162	0.00031903	0.0116978	IL21R|IL2RB|STAT4	http://www.genome.jp/kegg-bin/show_pathway?hsa04630/hsa:3560%09red/hsa:6775%09red/hsa:50615%09red
Allograft rejection	KEGG PATHWAY	hsa05330	2	38	0.000476525	0.015417	FASLG|GZMB	http://www.genome.jp/kegg-bin/show_pathway?hsa05330/hsa:3002%09red/hsa:356%09red
Graft-versus-host disease	KEGG PATHWAY	hsa05332	2	41	0.00055083	0.0158004	FASLG|GZMB	http://www.genome.jp/kegg-bin/show_pathway?hsa05332/hsa:3002%09red/hsa:356%09red
Epstein-Barr virus infection	KEGG PATHWAY	hsa05169	3	201	0.000592064	0.0158004	RUNX3|CD247|CD3E	http://www.genome.jp/kegg-bin/show_pathway?hsa05169/hsa:919%09red/hsa:916%09red/hsa:864%09red
Type I diabetes mellitus	KEGG PATHWAY	hsa04940	2	43	0.000603287	0.0158004	FASLG|GZMB	http://www.genome.jp/kegg-bin/show_pathway?hsa04940/hsa:3002%09red/hsa:356%09red
Human immunodeficiency virus 1 infection	KEGG PATHWAY	hsa05170	3	212	0.000689391	0.0172348	CD247|FASLG|CD3E	http://www.genome.jp/kegg-bin/show_pathway?hsa05170/hsa:919%09red/hsa:916%09red/hsa:356%09red
Human T-cell leukemia virus 1 infection	KEGG PATHWAY	hsa05166	3	219	0.000756331	0.0180862	IL2RB|LCK|CD3E	http://www.genome.jp/kegg-bin/show_pathway?hsa05166/hsa:3560%09red/hsa:3932%09red/hsa:916%09red
Autoimmune thyroid disease	KEGG PATHWAY	hsa05320	2	53	0.000900352	0.0198077	FASLG|GZMB	http://www.genome.jp/kegg-bin/show_pathway?hsa05320/hsa:3002%09red/hsa:356%09red
Hematopoietic cell lineage	KEGG PATHWAY	hsa04640	2	97	0.00287631	0.0465904	CD7|CD3E	http://www.genome.jp/kegg-bin/show_pathway?hsa04640/hsa:916%09red/hsa:924%09red
PI3K-Akt signaling pathway	KEGG PATHWAY	hsa04151	3	354	0.00293326	0.0465904	IL2RB|FASLG|PPP2R2B	http://www.genome.jp/kegg-bin/show_pathway?hsa04151/hsa:3560%09red/hsa:5521%09red/hsa:356%09red
Viral protein interaction with cytokine and cytokine receptor	KEGG PATHWAY	hsa04061	2	100	0.00304955	0.0465904	IL2RB|CCL4	http://www.genome.jp/kegg-bin/show_pathway?hsa04061/hsa:3560%09red/hsa:6351%09red
Sphingolipid signaling pathway	KEGG PATHWAY	hsa04071	2	119	0.00425704	0.0585343	S1PR5|PPP2R2B	http://www.genome.jp/kegg-bin/show_pathway?hsa04071/hsa:5521%09red/hsa:53637%09red
Yersinia infection	KEGG PATHWAY	hsa05135	2	121	0.00439509	0.0589585	ZAP70|LCK	http://www.genome.jp/kegg-bin/show_pathway?hsa05135/hsa:3932%09red/hsa:7535%09red
Apoptosis	KEGG PATHWAY	hsa04210	2	136	0.00549554	0.0666424	FASLG|GZMB	http://www.genome.jp/kegg-bin/show_pathway?hsa04210/hsa:3002%09red/hsa:356%09red
Hepatitis C	KEGG PATHWAY	hsa05160	2	155	0.00705131	0.072304	FASLG|PPP2R2B	http://www.genome.jp/kegg-bin/show_pathway?hsa05160/hsa:5521%09red/hsa:356%09red
Necroptosis	KEGG PATHWAY	hsa04217	2	162	0.00766908	0.072304	STAT4|FASLG	http://www.genome.jp/kegg-bin/show_pathway?hsa04217/hsa:6775%09red/hsa:356%09red
Hepatitis B	KEGG PATHWAY	hsa05161	2	163	0.00775927	0.072304	STAT4|FASLG	http://www.genome.jp/kegg-bin/show_pathway?hsa05161/hsa:6775%09red/hsa:356%09red
Pathways in cancer	KEGG PATHWAY	hsa05200	3	530	0.00888146	0.0729075	IL2RB|STAT4|FASLG	http://www.genome.jp/kegg-bin/show_pathway?hsa05200/hsa:3560%09red/hsa:6775%09red/hsa:356%09red
Transcriptional misregulation in cancer	KEGG PATHWAY	hsa05202	2	186	0.00996454	0.0782928	IL2RB|GZMB	http://www.genome.jp/kegg-bin/show_pathway?hsa05202/hsa:3560%09red/hsa:3002%09red
Human cytomegalovirus infection	KEGG PATHWAY	hsa05163	2	225	0.0142583	0.10063	FASLG|CCL4	http://www.genome.jp/kegg-bin/show_pathway?hsa05163/hsa:6351%09red/hsa:356%09red
Ras signaling pathway	KEGG PATHWAY	hsa04014	2	232	0.0151001	0.103813	FASLG|ZAP70	http://www.genome.jp/kegg-bin/show_pathway?hsa04014/hsa:7535%09red/hsa:356%09red
Terpenoid backbone biosynthesis	KEGG PATHWAY	hsa00900	1	22	0.0181999	0.115051	MVD	http://www.genome.jp/kegg-bin/show_pathway?hsa00900/hsa:4597%09red
MAPK signaling pathway	KEGG PATHWAY	hsa04010	2	295	0.0235901	0.130209	FASLG|DUSP2	http://www.genome.jp/kegg-bin/show_pathway?hsa04010/hsa:1844%09red/hsa:356%09red
Human papillomavirus infection	KEGG PATHWAY	hsa05165	2	330	0.0289762	0.145414	FASLG|PPP2R2B	http://www.genome.jp/kegg-bin/show_pathway?hsa05165/hsa:5521%09red/hsa:356%09red
African trypanosomiasis	KEGG PATHWAY	hsa05143	1	37	0.0298944	0.145414	FASLG	http://www.genome.jp/kegg-bin/show_pathway?hsa05143/hsa:356%09red
Notch signaling pathway	KEGG PATHWAY	hsa04330	1	48	0.0383838	0.160698	DTX3	http://www.genome.jp/kegg-bin/show_pathway?hsa04330/hsa:196403%09red
Malaria	KEGG PATHWAY	hsa05144	1	49	0.0391519	0.160698	KLRK1	http://www.genome.jp/kegg-bin/show_pathway?hsa05144/hsa:22914%09red
VEGF signaling pathway	KEGG PATHWAY	hsa04370	1	59	0.0468004	0.176303	SH2D2A	http://www.genome.jp/kegg-bin/show_pathway?hsa04370/hsa:9047%09red
Cytosolic DNA-sensing pathway	KEGG PATHWAY	hsa04623	1	63	0.0498431	0.183985	CCL4	http://www.genome.jp/kegg-bin/show_pathway?hsa04623/hsa:6351%09red
Platinum drug resistance	KEGG PATHWAY	hsa01524	1	73	0.0574085	0.201112	FASLG	http://www.genome.jp/kegg-bin/show_pathway?hsa01524/hsa:356%09red
Bacterial invasion of epithelial cells	KEGG PATHWAY	hsa05100	1	74	0.0581617	0.201188	SEPTIN1	http://www.genome.jp/kegg-bin/show_pathway?hsa05100/hsa:1731%09red
Inositol phosphate metabolism	KEGG PATHWAY	hsa00562	1	74	0.0581617	0.201188	PLCH2	http://www.genome.jp/kegg-bin/show_pathway?hsa00562/hsa:9651%09red
B cell receptor signaling pathway	KEGG PATHWAY	hsa04662	1	82	0.0641668	0.213889	CARD11	http://www.genome.jp/kegg-bin/show_pathway?hsa04662/hsa:84433%09red
Salmonella infection	KEGG PATHWAY	hsa05132	1	83	0.0649149	0.215079	CCL4	http://www.genome.jp/kegg-bin/show_pathway?hsa05132/hsa:6351%09red
mRNA surveillance pathway	KEGG PATHWAY	hsa03015	1	91	0.0708779	0.221493	PPP2R2B	http://www.genome.jp/kegg-bin/show_pathway?hsa03015/hsa:5521%09red
Morphine addiction	KEGG PATHWAY	hsa05032	1	91	0.0708779	0.221493	PDE4A	http://www.genome.jp/kegg-bin/show_pathway?hsa05032/hsa:5141%09red
Toll-like receptor signaling pathway	KEGG PATHWAY	hsa04620	1	104	0.0804885	0.240591	CCL4	http://www.genome.jp/kegg-bin/show_pathway?hsa04620/hsa:6351%09red
Parathyroid hormone synthesis, secretion and action	KEGG PATHWAY	hsa04928	1	106	0.0819584	0.24366	PDE4A	http://www.genome.jp/kegg-bin/show_pathway?hsa04928/hsa:5141%09red
Neurotrophin signaling pathway	KEGG PATHWAY	hsa04722	1	119	0.091457	0.263358	FASLG	http://www.genome.jp/kegg-bin/show_pathway?hsa04722/hsa:356%09red
AMPK signaling pathway	KEGG PATHWAY	hsa04152	1	120	0.0921837	0.264068	PPP2R2B	http://www.genome.jp/kegg-bin/show_pathway?hsa04152/hsa:5521%09red
Osteoclast differentiation	KEGG PATHWAY	hsa04380	1	128	0.0979766	0.273539	LCK	http://www.genome.jp/kegg-bin/show_pathway?hsa04380/hsa:3932%09red
Purine metabolism	KEGG PATHWAY	hsa00230	1	130	0.0994192	0.274617	PDE4A	http://www.genome.jp/kegg-bin/show_pathway?hsa00230/hsa:5141%09red
Dopaminergic synapse	KEGG PATHWAY	hsa04728	1	131	0.10014	0.274617	PPP2R2B	http://www.genome.jp/kegg-bin/show_pathway?hsa04728/hsa:5521%09red
FoxO signaling pathway	KEGG PATHWAY	hsa04068	1	132	0.100859	0.274617	FASLG	http://www.genome.jp/kegg-bin/show_pathway?hsa04068/hsa:356%09red
Metabolic pathways	KEGG PATHWAY	hsa01100	3	1433	0.106636	0.282403	PLCH2|PDE4A|MVD	http://www.genome.jp/kegg-bin/show_pathway?hsa01100/hsa:9651%09red/hsa:5141%09red/hsa:4597%09red
Cell adhesion molecules (CAMs)	KEGG PATHWAY	hsa04514	1	146	0.110879	0.286947	TIGIT	http://www.genome.jp/kegg-bin/show_pathway?hsa04514/hsa:201633%09red
Non-alcoholic fatty liver disease (NAFLD)	KEGG PATHWAY	hsa04932	1	149	0.113012	0.289099	FASLG	http://www.genome.jp/kegg-bin/show_pathway?hsa04932/hsa:356%09red
Adrenergic signaling in cardiomyocytes	KEGG PATHWAY	hsa04261	1	149	0.113012	0.289099	PPP2R2B	http://www.genome.jp/kegg-bin/show_pathway?hsa04261/hsa:5521%09red
Hippo signaling pathway	KEGG PATHWAY	hsa04390	1	154	0.116555	0.295416	PPP2R2B	http://www.genome.jp/kegg-bin/show_pathway?hsa04390/hsa:5521%09red
Wnt signaling pathway	KEGG PATHWAY	hsa04310	1	160	0.120789	0.301972	LGR6	http://www.genome.jp/kegg-bin/show_pathway?hsa04310/hsa:59352%09red
Influenza A	KEGG PATHWAY	hsa05164	1	167	0.125703	0.307275	FASLG	http://www.genome.jp/kegg-bin/show_pathway?hsa05164/hsa:356%09red
Tight junction	KEGG PATHWAY	hsa04530	1	170	0.127801	0.309651	PPP2R2B	http://www.genome.jp/kegg-bin/show_pathway?hsa04530/hsa:5521%09red
Chemokine signaling pathway	KEGG PATHWAY	hsa04062	1	190	0.141663	0.327372	CCL4	http://www.genome.jp/kegg-bin/show_pathway?hsa04062/hsa:6351%09red
Proteoglycans in cancer	KEGG PATHWAY	hsa05205	1	203	0.150557	0.337984	FASLG	http://www.genome.jp/kegg-bin/show_pathway?hsa05205/hsa:356%09red
Rap1 signaling pathway	KEGG PATHWAY	hsa04015	1	210	0.155308	0.343051	SKAP1	http://www.genome.jp/kegg-bin/show_pathway?hsa04015/hsa:8631%09red
cAMP signaling pathway	KEGG PATHWAY	hsa04024	1	214	0.158012	0.346241	PDE4A	http://www.genome.jp/kegg-bin/show_pathway?hsa04024/hsa:5141%09red
Endocytosis	KEGG PATHWAY	hsa04144	1	244	0.178021	0.376583	IL2RB	http://www.genome.jp/kegg-bin/show_pathway?hsa04144/hsa:3560%09red
Neuroactive ligand-receptor interaction	KEGG PATHWAY	hsa04080	1	338	0.237752	0.437336	S1PR5	http://www.genome.jp/kegg-bin/show_pathway?hsa04080/hsa:53637%09red
Herpes simplex virus 1 infection	KEGG PATHWAY	hsa05168	1	492	0.326559	0.545919	FASLG	http://www.genome.jp/kegg-bin/show_pathway?hsa05168/hsa:356%09red
--------------------
#Term	Database	ID	Input number	Background number	P-Value	Corrected P-Value	Input	Hyperlink
--------------------
#Term	Database	ID	Input number	Background number	P-Value	Corrected P-Value	Input	Hyperlink
protein kinase binding	Gene Ontology	GO:0019901	3	94	6.65e-05	0.00365511	SKAP1|CD3E|DUSP2	http://amigo.geneontology.org/amigo/term/GO:0019901
immune receptor activity	Gene Ontology	GO:0140375	2	22	0.000169992	0.00779131	IL2RB|IL21R	http://amigo.geneontology.org/amigo/term/GO:0140375
plasma membrane	Gene Ontology	GO:0005886	5	726	0.000287505	0.0112948	PDE4A|CD7|NCR3|ARL4C|LGR6	http://amigo.geneontology.org/amigo/term/GO:0005886
cell junction	Gene Ontology	GO:0030054	3	177	0.000411373	0.0141409	TIGIT|SKAP1|NCR3	http://amigo.geneontology.org/amigo/term/GO:0030054
molecular adaptor activity	Gene Ontology	GO:0060090	2	43	0.000603287	0.0158004	SKAP1|CD3E	http://amigo.geneontology.org/amigo/term/GO:0060090
transmembrane signaling receptor activity	Gene Ontology	GO:0004888	3	223	0.000796374	0.0182502	KLRK1|CD247|LGR6	http://amigo.geneontology.org/amigo/term/GO:0004888
membrane	Gene Ontology	GO:0016020	6	1443	0.000985698	0.0208513	PLEKHF1|SKAP1|S1PR5|PPP2R2B|MMP23B|PDE4A	http://amigo.geneontology.org/amigo/term/GO:0016020
adenyl nucleotide binding	Gene Ontology	GO:0030554	3	262	0.00125885	0.0256432	RUNX3|ZAP70|PDE4A	http://amigo.geneontology.org/amigo/term/GO:0030554
hydrolase activity	Gene Ontology	GO:0016787	4	593	0.00131443	0.0258191	PLCH2|FASLG|LCK|DUSP2	http://amigo.geneontology.org/amigo/term/GO:0016787
gene expression	Gene Ontology	GO:0010467	5	1111	0.00190911	0.0362073	EOMES|TBX21|STAT4|PRF1|CD3E	http://amigo.geneontology.org/amigo/term/GO:0010467
catalytic activity	Gene Ontology	GO:0003824	5	1162	0.00231733	0.0424843	CARD11|MVD|MMP23B|CCL4|LCK	http://amigo.geneontology.org/amigo/term/GO:0003824
phospholipid metabolic process	Gene Ontology	GO:0006644	2	93	0.0026528	0.0465344	PLCH2|LCK	http://amigo.geneontology.org/amigo/term/GO:0006644
regulation of cellular process	Gene Ontology	GO:0050794	10	4547	0.00270746	0.0465344	LGR6|CLIC3|TBX21|EOMES|KLRK1|SH2D2A|PRF1|PDE4A|CD3E|DUSP2	http://amigo.geneontology.org/amigo/term/GO:0050794
glycoprotein metabolic process	Gene Ontology	GO:0009100	2	100	0.00304955	0.0465904	MVD|SPOCK2	http://amigo.geneontology.org/amigo/term/GO:0009100
signaling	Gene Ontology	GO:0023052	9	3906	0.00334809	0.0497688	IL2RB|LGR6|PLEKHF1|CCL4|IL21R|PLCH2|SH2D2A|CD7|SPOCK2	http://amigo.geneontology.org/amigo/term/GO:0023052
transcription regulatory region sequence-specific DNA binding	Gene Ontology	GO:0000976	2	112	0.0037902	0.0548581	RUNX3|PRF1	http://amigo.geneontology.org/amigo/term/GO:0000976
cell surface	Gene Ontology	GO:0009986	2	119	0.00425704	0.0585343	KLRK1|IL2RB	http://amigo.geneontology.org/amigo/term/GO:0009986
trophectodermal cell differentiation	Gene Ontology	GO:0001829	1	5	0.00477934	0.0597418	EOMES	http://amigo.geneontology.org/amigo/term/GO:0001829
regulation of response to tumor cell	Gene Ontology	GO:0002834	1	5	0.00477934	0.0597418	KLRK1	http://amigo.geneontology.org/amigo/term/GO:0002834
cysteine-type endopeptidase activity involved in apoptotic signaling pathway	Gene Ontology	GO:0097199	1	5	0.00477934	0.0597418	FASLG	http://amigo.geneontology.org/amigo/term/GO:0097199
endodermal cell fate commitment	Gene Ontology	GO:0001711	1	6	0.00557373	0.0666424	EOMES	http://amigo.geneontology.org/amigo/term/GO:0001711
negative regulation of smoothened signaling pathway	Gene Ontology	GO:0045879	1	7	0.00636749	0.0714718	CD3E	http://amigo.geneontology.org/amigo/term/GO:0045879
positive regulation of natural killer cell mediated cytotoxicity directed against tumor cell target	Gene Ontology	GO:0002860	1	7	0.00636749	0.0714718	KLRK1	http://amigo.geneontology.org/amigo/term/GO:0002860
MHC protein binding	Gene Ontology	GO:0042287	1	7	0.00636749	0.0714718	KLRK1	http://amigo.geneontology.org/amigo/term/GO:0042287
regulation of natural killer cell mediated immune response to tumor cell	Gene Ontology	GO:0002855	1	8	0.00716063	0.072304	KLRK1	http://amigo.geneontology.org/amigo/term/GO:0002855
regulation of protein insertion into mitochondrial membrane involved in apoptotic signaling pathway	Gene Ontology	GO:1900739	1	8	0.00716063	0.072304	GZMB	http://amigo.geneontology.org/amigo/term/GO:1900739
cellular anatomical entity	Gene Ontology	GO:0110165	7	2864	0.00729428	0.072304	STAT4|GZMB|IL21R|MTFP1|FASLG|ARL4C|FCRL6	http://amigo.geneontology.org/amigo/term/GO:0110165
positive regulation of neuron apoptotic process	Gene Ontology	GO:0043525	1	9	0.00795316	0.072304	FASLG	http://amigo.geneontology.org/amigo/term/GO:0043525
natural killer cell mediated immune response to tumor cell	Gene Ontology	GO:0002423	1	9	0.00795316	0.072304	KLRK1	http://amigo.geneontology.org/amigo/term/GO:0002423
phospholipase C activity	Gene Ontology	GO:0004629	1	9	0.00795316	0.072304	PLCH2	http://amigo.geneontology.org/amigo/term/GO:0004629
signaling adaptor activity	Gene Ontology	GO:0035591	1	9	0.00795316	0.072304	SH2D2A	http://amigo.geneontology.org/amigo/term/GO:0035591
positive regulation of cellular process	Gene Ontology	GO:0048522	5	1567	0.00811671	0.072304	CARD11|SH2D2A|SKAP1|LGR6|ZAP70	http://amigo.geneontology.org/amigo/term/GO:0048522
positive regulation of macromolecule metabolic process	Gene Ontology	GO:0010604	3	513	0.00813286	0.072304	RUNX3|FASLG|CD3E	http://amigo.geneontology.org/amigo/term/GO:0010604
cell death	Gene Ontology	GO:0008219	4	993	0.00815064	0.072304	KLRK1|IL2RB|FASLG|PPP2R2B	http://amigo.geneontology.org/amigo/term/GO:0008219
negative regulation of nucleic acid-templated transcription	Gene Ontology	GO:1903507	2	171	0.00849797	0.0728755	RUNX3|FASLG	http://amigo.geneontology.org/amigo/term/GO:1903507
extracellular matrix binding	Gene Ontology	GO:0050840	1	10	0.00874506	0.0728755	SPOCK2	http://amigo.geneontology.org/amigo/term/GO:0050840
positive regulation of mitochondrial membrane permeability	Gene Ontology	GO:0035794	1	10	0.00874506	0.0728755	GZMB	http://amigo.geneontology.org/amigo/term/GO:0035794
regulation of tumor necrosis factor superfamily cytokine production	Gene Ontology	GO:1903555	1	10	0.00874506	0.0728755	SPON2	http://amigo.geneontology.org/amigo/term/GO:1903555
response to external biotic stimulus	Gene Ontology	GO:0043207	5	1614	0.00915042	0.0740108	TBX21|FASLG|CARD11|NCR3|KLRK1	http://amigo.geneontology.org/amigo/term/GO:0043207
cytoplasm	Gene Ontology	GO:0005737	5	1641	0.00978394	0.0779879	PLCH2|CARD11|LGR6|GZMB|PPP2R2B	http://amigo.geneontology.org/amigo/term/GO:0005737
regulation of cell-cell adhesion	Gene Ontology	GO:0022407	3	565	0.0105468	0.0817004	CARD11|CD247|LCK	http://amigo.geneontology.org/amigo/term/GO:0022407
protein binding	Gene Ontology	GO:0005515	5	1688	0.0109582	0.0837083	RUNX3|PPP2R2B|PDE4A|LGR6|GZMM	http://amigo.geneontology.org/amigo/term/GO:0005515
mesoderm morphogenesis	Gene Ontology	GO:0048332	1	14	0.0119065	0.0897066	EOMES	http://amigo.geneontology.org/amigo/term/GO:0048332
response to chemokine	Gene Ontology	GO:1990868	1	16	0.0134835	0.0988793	CCL4	http://amigo.geneontology.org/amigo/term/GO:1990868
purine ribonucleoside diphosphate metabolic process	Gene Ontology	GO:0009179	1	16	0.0134835	0.0988793	CARD11	http://amigo.geneontology.org/amigo/term/GO:0009179
regulation of protein localization to membrane	Gene Ontology	GO:1905475	1	17	0.0142711	0.10063	GZMB	http://amigo.geneontology.org/amigo/term/GO:1905475
ribonucleoside diphosphate metabolic process	Gene Ontology	GO:0009185	1	17	0.0142711	0.10063	CARD11	http://amigo.geneontology.org/amigo/term/GO:0009185
heat shock protein binding	Gene Ontology	GO:0031072	1	18	0.0150581	0.103813	MVD	http://amigo.geneontology.org/amigo/term/GO:0031072
metal ion binding	Gene Ontology	GO:0046872	3	657	0.0157413	0.104993	PDE4A|PRF1|SPON2	http://amigo.geneontology.org/amigo/term/GO:0046872
protein localization to cell periphery	Gene Ontology	GO:1990778	1	19	0.0158445	0.104993	PLEKHF1	http://amigo.geneontology.org/amigo/term/GO:1990778
cullin-RING ubiquitin ligase complex	Gene Ontology	GO:0031461	1	19	0.0158445	0.104993	FBXO44	http://amigo.geneontology.org/amigo/term/GO:0031461
signaling receptor binding	Gene Ontology	GO:0005102	2	243	0.016465	0.107607	ZAP70|CCL4	http://amigo.geneontology.org/amigo/term/GO:0005102
regulation of establishment of protein localization to mitochondrion	Gene Ontology	GO:1903747	1	20	0.0166302	0.107607	GZMB	http://amigo.geneontology.org/amigo/term/GO:1903747
regulation of response to stimulus	Gene Ontology	GO:0048583	5	1923	0.0182998	0.115051	SH2D1B|FASLG|SKAP1|PLEKHF1|CD3E	http://amigo.geneontology.org/amigo/term/GO:0048583
integral component of plasma membrane	Gene Ontology	GO:0005887	2	258	0.0184081	0.115051	KLRK1|TIGIT	http://amigo.geneontology.org/amigo/term/GO:0005887
protein phosphatase binding	Gene Ontology	GO:0019903	1	23	0.0189838	0.116012	LCK	http://amigo.geneontology.org/amigo/term/GO:0019903
leading edge membrane	Gene Ontology	GO:0031256	1	23	0.0189838	0.116012	PDE4A	http://amigo.geneontology.org/amigo/term/GO:0031256
extrinsic component of plasma membrane	Gene Ontology	GO:0019897	1	25	0.0205497	0.124202	LCK	http://amigo.geneontology.org/amigo/term/GO:0019897
cytoplasmic side of membrane	Gene Ontology	GO:0098562	1	26	0.0213318	0.127527	ZAP70	http://amigo.geneontology.org/amigo/term/GO:0098562
membrane-bounded organelle	Gene Ontology	GO:0043227	5	2030	0.0225235	0.130209	FASLG|STAT4|LGR6|PRF1|LCK	http://amigo.geneontology.org/amigo/term/GO:0043227
positive regulation of hemopoiesis	Gene Ontology	GO:1903708	1	28	0.0228941	0.130209	ZAP70	http://amigo.geneontology.org/amigo/term/GO:1903708
heterophilic cell-cell adhesion via plasma membrane cell adhesion molecules	Gene Ontology	GO:0007157	1	28	0.0228941	0.130209	NCR3	http://amigo.geneontology.org/amigo/term/GO:0007157
ribonucleotide binding	Gene Ontology	GO:0032553	2	292	0.0231499	0.130209	SEPTIN1|ZAP70	http://amigo.geneontology.org/amigo/term/GO:0032553
negative regulation of extrinsic apoptotic signaling pathway via death domain receptors	Gene Ontology	GO:1902042	1	29	0.0236744	0.130209	FASLG	http://amigo.geneontology.org/amigo/term/GO:1902042
positive regulation of endothelial cell apoptotic process	Gene Ontology	GO:2000353	1	29	0.0236744	0.130209	FASLG	http://amigo.geneontology.org/amigo/term/GO:2000353
inorganic anion transmembrane transport	Gene Ontology	GO:0098661	1	29	0.0236744	0.130209	CLIC3	http://amigo.geneontology.org/amigo/term/GO:0098661
enzyme linked receptor protein signaling pathway	Gene Ontology	GO:0007167	2	300	0.0243314	0.132498	SH2D2A|FASLG	http://amigo.geneontology.org/amigo/term/GO:0007167
positive regulation of leukocyte cell-cell adhesion	Gene Ontology	GO:1903039	1	31	0.025233	0.13489	KLRK1	http://amigo.geneontology.org/amigo/term/GO:1903039
cellular process	Gene Ontology	GO:0009987	6	2852	0.0252612	0.13489	SH2D1B|GZMM|PPP2R2B|MTFP1|ZAP70|PRF1	http://amigo.geneontology.org/amigo/term/GO:0009987
positive regulation of macromolecule biosynthetic process	Gene Ontology	GO:0010557	2	315	0.0266121	0.140737	TBX21|SKAP1	http://amigo.geneontology.org/amigo/term/GO:0010557
regulation of primary metabolic process	Gene Ontology	GO:0080090	4	1427	0.0270219	0.141385	TBX21|RUNX3|PRF1|CD3E	http://amigo.geneontology.org/amigo/term/GO:0080090
cell periphery	Gene Ontology	GO:0071944	3	812	0.0272488	0.141385	PDE4A|SKAP1|NCR3	http://amigo.geneontology.org/amigo/term/GO:0071944
enzyme binding	Gene Ontology	GO:0019899	2	330	0.0289762	0.145414	KLRK1|IL2RB	http://amigo.geneontology.org/amigo/term/GO:0019899
ubiquitin ligase complex	Gene Ontology	GO:0000151	1	36	0.029119	0.145414	FBXO44	http://amigo.geneontology.org/amigo/term/GO:0000151
negative regulation of apoptotic signaling pathway	Gene Ontology	GO:2001234	1	36	0.029119	0.145414	FASLG	http://amigo.geneontology.org/amigo/term/GO:2001234
modification of morphology or physiology of other organism involved in symbiotic interaction	Gene Ontology	GO:0051817	1	37	0.0298944	0.145414	CCL4	http://amigo.geneontology.org/amigo/term/GO:0051817
intrinsic component of membrane	Gene Ontology	GO:0031224	3	843	0.0299697	0.145414	FASLG|LGR6|NCR3	http://amigo.geneontology.org/amigo/term/GO:0031224
organic cyclic compound binding	Gene Ontology	GO:0097159	3	845	0.03015	0.145414	SEPTIN1|ZAP70|LCK	http://amigo.geneontology.org/amigo/term/GO:0097159
Notch signaling pathway	Gene Ontology	GO:0007219	1	38	0.0306692	0.145414	DTX3	http://amigo.geneontology.org/amigo/term/GO:0007219
phosphatidylinositol binding	Gene Ontology	GO:0035091	1	38	0.0306692	0.145414	PLEKHF1	http://amigo.geneontology.org/amigo/term/GO:0035091
extrinsic component of membrane	Gene Ontology	GO:0019898	1	39	0.0314434	0.146558	ZAP70	http://amigo.geneontology.org/amigo/term/GO:0019898
Golgi subcompartment	Gene Ontology	GO:0098791	1	39	0.0314434	0.146558	LGR6	http://amigo.geneontology.org/amigo/term/GO:0098791
voltage-gated channel activity	Gene Ontology	GO:0022832	1	40	0.0322169	0.147784	CLIC3	http://amigo.geneontology.org/amigo/term/GO:0022832
integral component of membrane	Gene Ontology	GO:0016021	3	871	0.032547	0.147784	IL2RB|MTFP1|CLIC3	http://amigo.geneontology.org/amigo/term/GO:0016021
binding	Gene Ontology	GO:0005488	5	2247	0.0329419	0.147784	TBX21|LGR6|MVD|DTX3|PPP2R2B	http://amigo.geneontology.org/amigo/term/GO:0005488
regulation of natural killer cell chemotaxis	Gene Ontology	GO:2000501	1	41	0.0329899	0.147784	KLRK1	http://amigo.geneontology.org/amigo/term/GO:2000501
primary metabolic process	Gene Ontology	GO:0044238	5	2249	0.0330499	0.147784	EOMES|GZMM|PLCH2|TBX21|DUSP2	http://amigo.geneontology.org/amigo/term/GO:0044238
endoderm formation	Gene Ontology	GO:0001706	1	42	0.0337622	0.149752	EOMES	http://amigo.geneontology.org/amigo/term/GO:0001706
regulation of cell death	Gene Ontology	GO:0010941	3	888	0.034167	0.150335	IL2RB|FASLG|GZMB	http://amigo.geneontology.org/amigo/term/GO:0010941
blastocyst formation	Gene Ontology	GO:0001825	1	45	0.0360757	0.157473	EOMES	http://amigo.geneontology.org/amigo/term/GO:0001825
membrane raft	Gene Ontology	GO:0045121	1	46	0.0368457	0.159204	LCK	http://amigo.geneontology.org/amigo/term/GO:0045121
membrane region	Gene Ontology	GO:0098589	1	47	0.037615	0.159204	FASLG	http://amigo.geneontology.org/amigo/term/GO:0098589
receptor complex	Gene Ontology	GO:0043235	1	47	0.037615	0.159204	SKAP1	http://amigo.geneontology.org/amigo/term/GO:0043235
cellular nitrogen compound biosynthetic process	Gene Ontology	GO:0044271	4	1586	0.0376301	0.159204	TBX21|PDE4A|STAT4|SKAP1	http://amigo.geneontology.org/amigo/term/GO:0044271
response to other organism	Gene Ontology	GO:0051707	4	1604	0.0389634	0.160698	TBX21|KLRK1|ZAP70|CCL4	http://amigo.geneontology.org/amigo/term/GO:0051707
peptide cross-linking	Gene Ontology	GO:0018149	1	49	0.0391519	0.160698	SPOCK2	http://amigo.geneontology.org/amigo/term/GO:0018149
ion channel complex	Gene Ontology	GO:0034702	1	51	0.0406864	0.164541	CLIC3	http://amigo.geneontology.org/amigo/term/GO:0034702
cell leading edge	Gene Ontology	GO:0031252	1	51	0.0406864	0.164541	PDE4A	http://amigo.geneontology.org/amigo/term/GO:0031252
visual system development	Gene Ontology	GO:0150063	1	52	0.0414527	0.166199	FASLG	http://amigo.geneontology.org/amigo/term/GO:0150063
ion binding	Gene Ontology	GO:0043167	3	962	0.0417009	0.166199	PDE4A|PRF1|SPON2	http://amigo.geneontology.org/amigo/term/GO:0043167
peptidyl-serine modification	Gene Ontology	GO:0018209	1	53	0.0422185	0.167052	SPOCK2	http://amigo.geneontology.org/amigo/term/GO:0018209
positive regulation of response to biotic stimulus	Gene Ontology	GO:0002833	2	416	0.0440314	0.17298	KLRK1|NCR3	http://amigo.geneontology.org/amigo/term/GO:0002833
positive regulation of DNA metabolic process	Gene Ontology	GO:0051054	1	56	0.0445121	0.173629	TBX21	http://amigo.geneontology.org/amigo/term/GO:0051054
RNA polymerase II-specific DNA-binding transcription factor binding	Gene Ontology	GO:0061629	1	57	0.0452755	0.175363	EOMES	http://amigo.geneontology.org/amigo/term/GO:0061629
phosphatase activity	Gene Ontology	GO:0016791	1	58	0.0460383	0.175841	DUSP2	http://amigo.geneontology.org/amigo/term/GO:0016791
phospholipid binding	Gene Ontology	GO:0005543	1	58	0.0460383	0.175841	PLEKHF1	http://amigo.geneontology.org/amigo/term/GO:0005543
intrinsic apoptotic signaling pathway	Gene Ontology	GO:0097193	1	59	0.0468004	0.176303	PLEKHF1	http://amigo.geneontology.org/amigo/term/GO:0097193
localization of cell	Gene Ontology	GO:0051674	3	1025	0.0487235	0.182299	TBX21|KLRK1|LGR6	http://amigo.geneontology.org/amigo/term/GO:0051674
extracellular organelle	Gene Ontology	GO:0043230	2	444	0.0494424	0.183739	FASLG|PRSS23	http://amigo.geneontology.org/amigo/term/GO:0043230
metabolic process	Gene Ontology	GO:0008152	5	2527	0.050292	0.184313	TBX21|CARD11|STAT4|SPOCK2|PRSS23	http://amigo.geneontology.org/amigo/term/GO:0008152
nucleoside binding	Gene Ontology	GO:0001882	1	64	0.0506023	0.184313	SEPTIN1	http://amigo.geneontology.org/amigo/term/GO:0001882
regulation of autophagy	Gene Ontology	GO:0010506	1	65	0.0513609	0.185846	PLEKHF1	http://amigo.geneontology.org/amigo/term/GO:0010506
glycerophospholipid metabolic process	Gene Ontology	GO:0006650	1	68	0.0536332	0.192799	PLCH2	http://amigo.geneontology.org/amigo/term/GO:0006650
regulation of metabolic process	Gene Ontology	GO:0019222	3	1070	0.0540749	0.193125	KLRK1|PLEKHF1|PRF1	http://amigo.geneontology.org/amigo/term/GO:0019222
positive regulation of nitrogen compound metabolic process	Gene Ontology	GO:0051173	2	469	0.0544671	0.19327	CARD11|FASLG	http://amigo.geneontology.org/amigo/term/GO:0051173
protein N-linked glycosylation	Gene Ontology	GO:0006487	1	73	0.0574085	0.201112	MVD	http://amigo.geneontology.org/amigo/term/GO:0006487
inositol phosphate metabolic process	Gene Ontology	GO:0043647	1	76	0.0596665	0.205104	PLCH2	http://amigo.geneontology.org/amigo/term/GO:0043647
regulation of lymphocyte anergy	Gene Ontology	GO:0002911	1	77	0.0604181	0.205123	CD3E	http://amigo.geneontology.org/amigo/term/GO:0002911
Ras GTPase binding	Gene Ontology	GO:0017016	1	77	0.0604181	0.205123	IL2RB	http://amigo.geneontology.org/amigo/term/GO:0017016
response to organic substance	Gene Ontology	GO:0010033	4	1884	0.0631957	0.212683	TBX21|KLRK1|IL2RB|FASLG	http://amigo.geneontology.org/amigo/term/GO:0010033
epithelial to mesenchymal transition	Gene Ontology	GO:0001837	1	81	0.0634183	0.212683	EOMES	http://amigo.geneontology.org/amigo/term/GO:0001837
negative regulation of phosphorylation	Gene Ontology	GO:0042326	1	84	0.0656623	0.216253	DUSP2	http://amigo.geneontology.org/amigo/term/GO:0042326
nucleoside phosphate biosynthetic process	Gene Ontology	GO:1901293	1	87	0.067901	0.221493	CARD11	http://amigo.geneontology.org/amigo/term/GO:1901293
dephosphorylation	Gene Ontology	GO:0016311	1	89	0.0693906	0.221493	LCK	http://amigo.geneontology.org/amigo/term/GO:0016311
plasma membrane protein complex	Gene Ontology	GO:0098797	1	89	0.0693906	0.221493	CD247	http://amigo.geneontology.org/amigo/term/GO:0098797
phosphoric ester hydrolase activity	Gene Ontology	GO:0042578	1	89	0.0693906	0.221493	PLCH2	http://amigo.geneontology.org/amigo/term/GO:0042578
RNA polymerase II regulatory region DNA binding	Gene Ontology	GO:0001012	1	90	0.0701345	0.221493	EOMES	http://amigo.geneontology.org/amigo/term/GO:0001012
regulation of T cell tolerance induction	Gene Ontology	GO:0002664	1	91	0.0708779	0.221493	CD3E	http://amigo.geneontology.org/amigo/term/GO:0002664
perinuclear region of cytoplasm	Gene Ontology	GO:0048471	1	91	0.0708779	0.221493	PLEKHF1	http://amigo.geneontology.org/amigo/term/GO:0048471
vacuole	Gene Ontology	GO:0005773	1	95	0.0738454	0.228174	FASLG	http://amigo.geneontology.org/amigo/term/GO:0005773
protein domain specific binding	Gene Ontology	GO:0019904	1	95	0.0738454	0.228174	CARD11	http://amigo.geneontology.org/amigo/term/GO:0019904
positive regulation of catabolic process	Gene Ontology	GO:0009896	1	97	0.0753257	0.231448	PLEKHF1	http://amigo.geneontology.org/amigo/term/GO:0009896
regulation of protein metabolic process	Gene Ontology	GO:0051246	2	571	0.0766755	0.233977	LCK|CCL4	http://amigo.geneontology.org/amigo/term/GO:0051246
positive regulation of protein metabolic process	Gene Ontology	GO:0051247	2	574	0.0773666	0.233977	LCK|CD3E	http://amigo.geneontology.org/amigo/term/GO:0051247
nucleoside monophosphate metabolic process	Gene Ontology	GO:0009123	1	100	0.0775418	0.233977	CARD11	http://amigo.geneontology.org/amigo/term/GO:0009123
positive regulation of immune response	Gene Ontology	GO:0050778	4	2025	0.0778504	0.233977	TBX21|NCR3|ZAP70|CD3E	http://amigo.geneontology.org/amigo/term/GO:0050778
immune system process	Gene Ontology	GO:0002376	5	2932	0.0835071	0.24693	EOMES|SH2D1B|CARD11|NCR3|SPON2	http://amigo.geneontology.org/amigo/term/GO:0002376
organelle	Gene Ontology	GO:0043226	4	2086	0.0846835	0.249069	TBX21|RUNX3|SPON2|DUSP2	http://amigo.geneontology.org/amigo/term/GO:0043226
intracellular signal transduction	Gene Ontology	GO:0035556	3	1300	0.0855513	0.250283	PLCH2|IL2RB|ZAP70	http://amigo.geneontology.org/amigo/term/GO:0035556
transferase complex	Gene Ontology	GO:1990234	1	115	0.0885447	0.25767	FBXO44	http://amigo.geneontology.org/amigo/term/GO:1990234
purine ribonucleoside monophosphate metabolic process	Gene Ontology	GO:0009167	1	118	0.0907298	0.262639	CARD11	http://amigo.geneontology.org/amigo/term/GO:0009167
positive regulation of metabolic process	Gene Ontology	GO:0009893	2	642	0.0935465	0.265461	KLRK1|PLEKHF1	http://amigo.geneontology.org/amigo/term/GO:0009893
mitochondrial envelope	Gene Ontology	GO:0005740	1	122	0.0936353	0.265461	PPP2R2B	http://amigo.geneontology.org/amigo/term/GO:0005740
protein homodimerization activity	Gene Ontology	GO:0042803	1	126	0.0965318	0.272172	NCR3	http://amigo.geneontology.org/amigo/term/GO:0042803
regulation of cell adhesion	Gene Ontology	GO:0030155	2	656	0.0969923	0.272172	SKAP1|SPOCK2	http://amigo.geneontology.org/amigo/term/GO:0030155
regulatory region nucleic acid binding	Gene Ontology	GO:0001067	1	130	0.0994192	0.274617	STAT4	http://amigo.geneontology.org/amigo/term/GO:0001067
cellular macromolecule biosynthetic process	Gene Ontology	GO:0034645	4	2221	0.100827	0.274617	TBX21|RUNX3|SKAP1|MVD	http://amigo.geneontology.org/amigo/term/GO:0034645
regulation of proteolysis	Gene Ontology	GO:0030162	1	133	0.101579	0.275213	LCK	http://amigo.geneontology.org/amigo/term/GO:0030162
viral gene expression	Gene Ontology	GO:0019080	1	134	0.102298	0.275802	CCL4	http://amigo.geneontology.org/amigo/term/GO:0019080
endopeptidase activity	Gene Ontology	GO:0004175	1	139	0.105883	0.282403	MMP23B	http://amigo.geneontology.org/amigo/term/GO:0004175
chondroitin sulfate proteoglycan metabolic process	Gene Ontology	GO:0050654	1	140	0.106598	0.282403	SPOCK2	http://amigo.geneontology.org/amigo/term/GO:0050654
positive regulation of leukocyte mediated immunity	Gene Ontology	GO:0002705	2	696	0.107033	0.282403	TBX21|NCR3	http://amigo.geneontology.org/amigo/term/GO:0002705
regulation of DNA recombination	Gene Ontology	GO:0000018	1	141	0.107313	0.282403	TBX21	http://amigo.geneontology.org/amigo/term/GO:0000018
natural killer cell mediated immunity	Gene Ontology	GO:0002228	2	707	0.109843	0.286947	NCR3|GZMB	http://amigo.geneontology.org/amigo/term/GO:0002228
regulation of multi-organism process	Gene Ontology	GO:0043900	2	710	0.110613	0.286947	NCR3|CCL4	http://amigo.geneontology.org/amigo/term/GO:0043900
intracellular organelle lumen	Gene Ontology	GO:0070013	2	712	0.111127	0.286947	STAT4|FASLG	http://amigo.geneontology.org/amigo/term/GO:0070013
negative regulation of cellular protein metabolic process	Gene Ontology	GO:0032269	1	150	0.113721	0.289568	DUSP2	http://amigo.geneontology.org/amigo/term/GO:0032269
export from cell	Gene Ontology	GO:0140352	1	156	0.117969	0.297627	ZAP70	http://amigo.geneontology.org/amigo/term/GO:0140352
GTPase activity	Gene Ontology	GO:0003924	1	158	0.11938	0.299812	ARL4C	http://amigo.geneontology.org/amigo/term/GO:0003924
regulation of biological process	Gene Ontology	GO:0050789	6	4270	0.122872	0.305791	KLRK1|S1PR5|RUNX3|CD247|ZAP70|PDE4A	http://amigo.geneontology.org/amigo/term/GO:0050789
organelle envelope	Gene Ontology	GO:0031967	1	165	0.124302	0.307275	PPP2R2B	http://amigo.geneontology.org/amigo/term/GO:0031967
pattern specification process	Gene Ontology	GO:0007389	1	167	0.125703	0.307275	EOMES	http://amigo.geneontology.org/amigo/term/GO:0007389
microtubule cytoskeleton	Gene Ontology	GO:0015630	1	167	0.125703	0.307275	LCK	http://amigo.geneontology.org/amigo/term/GO:0015630
heterocycle metabolic process	Gene Ontology	GO:0046483	4	2420	0.127049	0.309189	TBX21|RUNX3|FASLG|PDE4A	http://amigo.geneontology.org/amigo/term/GO:0046483
defense response to other organism	Gene Ontology	GO:0098542	3	1562	0.128849	0.31082	SH2D1B|GZMM|LCK	http://amigo.geneontology.org/amigo/term/GO:0098542
peptidyl-amino acid modification	Gene Ontology	GO:0018193	1	182	0.136144	0.326345	SPOCK2	http://amigo.geneontology.org/amigo/term/GO:0018193
intracellular membrane-bounded organelle	Gene Ontology	GO:0043231	3	1606	0.136784	0.326345	TBX21|SKAP1|PRF1	http://amigo.geneontology.org/amigo/term/GO:0043231
regulation of catabolic process	Gene Ontology	GO:0009894	1	184	0.137527	0.326345	PLEKHF1	http://amigo.geneontology.org/amigo/term/GO:0009894
T cell receptor signaling pathway	Gene Ontology	GO:0050852	2	817	0.138943	0.326345	ZAP70|LCK	http://amigo.geneontology.org/amigo/term/GO:0050852
protein phosphorylation	Gene Ontology	GO:0006468	2	818	0.139215	0.326345	LCK|CCL4	http://amigo.geneontology.org/amigo/term/GO:0006468
phosphorylation	Gene Ontology	GO:0016310	2	819	0.139487	0.326345	RUNX3|ZAP70	http://amigo.geneontology.org/amigo/term/GO:0016310
regulation of isotype switching	Gene Ontology	GO:0045191	1	187	0.139597	0.326345	TBX21	http://amigo.geneontology.org/amigo/term/GO:0045191
cellular protein modification process	Gene Ontology	GO:0006464	2	821	0.140032	0.326345	LCK|DTX3	http://amigo.geneontology.org/amigo/term/GO:0006464
activation of cysteine-type endopeptidase activity involved in apoptotic signaling pathway	Gene Ontology	GO:0097296	1	190	0.141663	0.327372	FASLG	http://amigo.geneontology.org/amigo/term/GO:0097296
organic substance metabolic process	Gene Ontology	GO:0071704	4	2548	0.145321	0.33442	GZMM|IL2RB|MMP23B|PRF1	http://amigo.geneontology.org/amigo/term/GO:0071704
regulation of adaptive immune response based on somatic recombination of immune receptors built from immunoglobulin superfamily domains	Gene Ontology	GO:0002822	2	849	0.147706	0.337371	TBX21|NCR3	http://amigo.geneontology.org/amigo/term/GO:0002822
negative regulation of apoptotic process	Gene Ontology	GO:0043066	1	199	0.14783	0.337371	FASLG	http://amigo.geneontology.org/amigo/term/GO:0043066
macromolecule modification	Gene Ontology	GO:0043412	2	852	0.148534	0.337577	SPOCK2|DUSP2	http://amigo.geneontology.org/amigo/term/GO:0043412
purine ribonucleotide metabolic process	Gene Ontology	GO:0009150	1	202	0.149876	0.337835	MVD	http://amigo.geneontology.org/amigo/term/GO:0009150
identical protein binding	Gene Ontology	GO:0042802	1	202	0.149876	0.337835	CD247	http://amigo.geneontology.org/amigo/term/GO:0042802
hydrolase activity, acting on acid anhydrides	Gene Ontology	GO:0016817	1	206	0.152596	0.341171	IL2RB	http://amigo.geneontology.org/amigo/term/GO:0016817
negative regulation of transcription by RNA polymerase II	Gene Ontology	GO:0000122	1	209	0.154631	0.342932	RUNX3	http://amigo.geneontology.org/amigo/term/GO:0000122
regulation of defense response to virus by virus	Gene Ontology	GO:0050690	1	209	0.154631	0.342932	CD247	http://amigo.geneontology.org/amigo/term/GO:0050690
positive regulation of intracellular signal transduction	Gene Ontology	GO:1902533	2	879	0.156026	0.343256	CARD11|LCK	http://amigo.geneontology.org/amigo/term/GO:1902533
DNA-binding transcription factor activity	Gene Ontology	GO:0003700	1	221	0.162723	0.355149	TBX21	http://amigo.geneontology.org/amigo/term/GO:0003700
nitric oxide biosynthetic process	Gene Ontology	GO:0006809	1	223	0.164064	0.356661	KLRK1	http://amigo.geneontology.org/amigo/term/GO:0006809
biosynthetic process	Gene Ontology	GO:0009058	3	1756	0.165048	0.357387	TBX21|RUNX3|CARD11	http://amigo.geneontology.org/amigo/term/GO:0009058
hydrolase activity, acting on acid anhydrides, in phosphorus-containing anhydrides	Gene Ontology	GO:0016818	1	227	0.16674	0.359636	KLRK1	http://amigo.geneontology.org/amigo/term/GO:0016818
receptor signaling pathway via JAK-STAT	Gene Ontology	GO:0007259	1	231	0.169408	0.363963	STAT4	http://amigo.geneontology.org/amigo/term/GO:0007259
cellular macromolecule metabolic process	Gene Ontology	GO:0044260	4	2713	0.17033	0.36452	EOMES|CARD11|PRF1|SPOCK2	http://amigo.geneontology.org/amigo/term/GO:0044260
regulation of angiogenesis	Gene Ontology	GO:0045765	1	239	0.174719	0.372462	FASLG	http://amigo.geneontology.org/amigo/term/GO:0045765
phosphotransferase activity, alcohol group as acceptor	Gene Ontology	GO:0016773	1	241	0.176041	0.373833	ZAP70	http://amigo.geneontology.org/amigo/term/GO:0016773
cellular biosynthetic process	Gene Ontology	GO:0044249	3	1833	0.180204	0.378589	TBX21|KLRK1|MVD	http://amigo.geneontology.org/amigo/term/GO:0044249
negative regulation of cellular process	Gene Ontology	GO:0048523	2	965	0.180346	0.378589	EOMES|FASLG	http://amigo.geneontology.org/amigo/term/GO:0048523
positive regulation of RNA metabolic process	Gene Ontology	GO:0051254	1	250	0.181967	0.380539	SKAP1	http://amigo.geneontology.org/amigo/term/GO:0051254
positive regulation of RNA biosynthetic process	Gene Ontology	GO:1902680	1	254	0.184587	0.384556	RUNX3	http://amigo.geneontology.org/amigo/term/GO:1902680
intracellular organelle	Gene Ontology	GO:0043229	3	1863	0.186214	0.385362	FASLG|PLEKHF1|PPP2R2B	http://amigo.geneontology.org/amigo/term/GO:0043229
positive regulation of mononuclear cell proliferation	Gene Ontology	GO:0032946	2	986	0.186375	0.385362	CARD11|CD3E	http://amigo.geneontology.org/amigo/term/GO:0032946
negative regulation of MAPK cascade	Gene Ontology	GO:0043409	1	259	0.18785	0.386958	DUSP2	http://amigo.geneontology.org/amigo/term/GO:0043409
regulation of catalytic activity	Gene Ontology	GO:0050790	2	1012	0.193881	0.39789	KLRK1|DUSP2	http://amigo.geneontology.org/amigo/term/GO:0050790
positive regulation of cytokine production	Gene Ontology	GO:0001819	2	1015	0.19475	0.398187	KLRK1|TIGIT	http://amigo.geneontology.org/amigo/term/GO:0001819
positive regulation of signal transduction	Gene Ontology	GO:0009967	2	1019	0.195909	0.399074	CARD11|PLEKHF1	http://amigo.geneontology.org/amigo/term/GO:0009967
regulation of intracellular signal transduction	Gene Ontology	GO:1902531	2	1023	0.197069	0.399956	ZAP70|DUSP2	http://amigo.geneontology.org/amigo/term/GO:1902531
viral process	Gene Ontology	GO:0016032	1	275	0.198208	0.400616	CD247	http://amigo.geneontology.org/amigo/term/GO:0016032
bounding membrane of organelle	Gene Ontology	GO:0098588	1	276	0.198851	0.400616	PPP2R2B	http://amigo.geneontology.org/amigo/term/GO:0098588
cellular chemical homeostasis	Gene Ontology	GO:0055082	2	1039	0.201719	0.40491	FASLG|LCK	http://amigo.geneontology.org/amigo/term/GO:0055082
cellular protein localization	Gene Ontology	GO:0034613	1	282	0.202699	0.405204	PLEKHF1	http://amigo.geneontology.org/amigo/term/GO:0034613
intrinsic component of plasma membrane	Gene Ontology	GO:0031226	1	283	0.203339	0.405204	KLRK1	http://amigo.geneontology.org/amigo/term/GO:0031226
positive regulation of cellular biosynthetic process	Gene Ontology	GO:0031328	1	285	0.204616	0.40588	TBX21	http://amigo.geneontology.org/amigo/term/GO:0031328
positive regulation of nucleobase-containing compound metabolic process	Gene Ontology	GO:0045935	1	287	0.205892	0.40588	SKAP1	http://amigo.geneontology.org/amigo/term/GO:0045935
apoptotic signaling pathway	Gene Ontology	GO:0097190	1	287	0.205892	0.40588	LCK	http://amigo.geneontology.org/amigo/term/GO:0097190
purine ribonucleotide binding	Gene Ontology	GO:0032555	1	292	0.209072	0.410677	ZAP70	http://amigo.geneontology.org/amigo/term/GO:0032555
phosphorus metabolic process	Gene Ontology	GO:0006793	2	1067	0.209888	0.410814	PDE4A|CARD11	http://amigo.geneontology.org/amigo/term/GO:0006793
lymphocyte differentiation	Gene Ontology	GO:0030098	2	1071	0.211059	0.411639	TBX21|CARD11	http://amigo.geneontology.org/amigo/term/GO:0030098
ribonucleoside metabolic process	Gene Ontology	GO:0009119	1	298	0.212872	0.413242	CARD11	http://amigo.geneontology.org/amigo/term/GO:0009119
positive regulation of apoptotic process	Gene Ontology	GO:0043065	1	299	0.213504	0.413242	LCK	http://amigo.geneontology.org/amigo/term/GO:0043065
drug binding	Gene Ontology	GO:0008144	1	300	0.214135	0.413242	MVD	http://amigo.geneontology.org/amigo/term/GO:0008144
cell adhesion	Gene Ontology	GO:0007155	2	1094	0.2178	0.418802	SPON2|ZAP70	http://amigo.geneontology.org/amigo/term/GO:0007155
molecular function regulator	Gene Ontology	GO:0098772	1	307	0.218538	0.418802	CCL4	http://amigo.geneontology.org/amigo/term/GO:0098772
tube development	Gene Ontology	GO:0035295	1	311	0.221044	0.421811	FASLG	http://amigo.geneontology.org/amigo/term/GO:0035295
immune effector process	Gene Ontology	GO:0002252	3	2035	0.221642	0.421811	SH2D1B|SPON2|KLRK1	http://amigo.geneontology.org/amigo/term/GO:0002252
cytoskeleton	Gene Ontology	GO:0005856	1	320	0.226653	0.429554	SEPTIN1	http://amigo.geneontology.org/amigo/term/GO:0005856
negative regulation of viral process	Gene Ontology	GO:0048525	1	321	0.227273	0.429554	CCL4	http://amigo.geneontology.org/amigo/term/GO:0048525
biological adhesion	Gene Ontology	GO:0022610	2	1136	0.230164	0.431131	CARD11|CD3E	http://amigo.geneontology.org/amigo/term/GO:0022610
hemopoiesis	Gene Ontology	GO:0030097	2	1137	0.230459	0.431131	EOMES|ZAP70	http://amigo.geneontology.org/amigo/term/GO:0030097
regulation of hydrolase activity	Gene Ontology	GO:0051336	2	1137	0.230459	0.431131	IL2RB|LCK	http://amigo.geneontology.org/amigo/term/GO:0051336
positive regulation of alpha-beta T cell differentiation	Gene Ontology	GO:0046638	1	329	0.232222	0.431493	ZAP70	http://amigo.geneontology.org/amigo/term/GO:0046638
positive regulation of isotype switching	Gene Ontology	GO:0045830	1	329	0.232222	0.431493	TBX21	http://amigo.geneontology.org/amigo/term/GO:0045830
regulation of interleukin-2 biosynthetic process	Gene Ontology	GO:0045076	1	332	0.23407	0.432428	CD3E	http://amigo.geneontology.org/amigo/term/GO:0045076
regulation of signal transduction	Gene Ontology	GO:0009966	2	1150	0.234297	0.432428	LCK|DUSP2	http://amigo.geneontology.org/amigo/term/GO:0009966
negative regulation of cellular macromolecule biosynthetic process	Gene Ontology	GO:2000113	2	1167	0.239324	0.43876	EOMES|RUNX3	http://amigo.geneontology.org/amigo/term/GO:2000113
nucleus	Gene Ontology	GO:0005634	2	1182	0.243764	0.445416	TBX21|PRSS23	http://amigo.geneontology.org/amigo/term/GO:0005634
carbohydrate derivative binding	Gene Ontology	GO:0097367	1	351	0.245671	0.447414	SPOCK2	http://amigo.geneontology.org/amigo/term/GO:0097367
somatic diversification of immune receptors via germline recombination within a single locus	Gene Ontology	GO:0002562	1	353	0.246882	0.448136	TBX21	http://amigo.geneontology.org/amigo/term/GO:0002562
regulation of defense response	Gene Ontology	GO:0031347	2	1219	0.254734	0.46082	SH2D1B|KLRK1	http://amigo.geneontology.org/amigo/term/GO:0031347
negative regulation of RNA metabolic process	Gene Ontology	GO:0051253	1	368	0.255906	0.46082	RUNX3	http://amigo.geneontology.org/amigo/term/GO:0051253
biological regulation	Gene Ontology	GO:0065007	5	4289	0.256384	0.46082	SH2D1B|RUNX3|IL2RB|CD247|LCK	http://amigo.geneontology.org/amigo/term/GO:0065007
cellular response to organic substance	Gene Ontology	GO:0071310	2	1230	0.257999	0.462214	SPON2|CCL4	http://amigo.geneontology.org/amigo/term/GO:0071310
nucleotide binding	Gene Ontology	GO:0000166	1	377	0.261269	0.466551	ZAP70	http://amigo.geneontology.org/amigo/term/GO:0000166
blood vessel development	Gene Ontology	GO:0001568	1	381	0.26364	0.469263	FASLG	http://amigo.geneontology.org/amigo/term/GO:0001568
positive regulation of response to external stimulus	Gene Ontology	GO:0032103	2	1254	0.265127	0.470386	CARD11|NCR3	http://amigo.geneontology.org/amigo/term/GO:0032103
cell population proliferation	Gene Ontology	GO:0008283	3	2249	0.267485	0.472035	RUNX3|LCK|CD3E	http://amigo.geneontology.org/amigo/term/GO:0008283
nucleoside phosphate binding	Gene Ontology	GO:1901265	1	388	0.267772	0.472035	LCK	http://amigo.geneontology.org/amigo/term/GO:1901265
leukocyte aggregation	Gene Ontology	GO:0070486	1	395	0.271882	0.477748	ZAP70	http://amigo.geneontology.org/amigo/term/GO:0070486
negative regulation of metabolic process	Gene Ontology	GO:0009892	2	1296	0.277604	0.48625	EOMES|CD3E	http://amigo.geneontology.org/amigo/term/GO:0009892
regulation of cellular protein metabolic process	Gene Ontology	GO:0032268	1	412	0.281769	0.491742	LCK	http://amigo.geneontology.org/amigo/term/GO:0032268
multicellular organismal process	Gene Ontology	GO:0032501	5	4458	0.282635	0.491742	KLRK1|TIGIT|FASLG|CD3E|S1PR5	http://amigo.geneontology.org/amigo/term/GO:0032501
response to external stimulus	Gene Ontology	GO:0009605	3	2322	0.283422	0.491742	TBX21|SPON2|ZAP70	http://amigo.geneontology.org/amigo/term/GO:0009605
macromolecule localization	Gene Ontology	GO:0033036	1	440	0.297767	0.515006	SKAP1	http://amigo.geneontology.org/amigo/term/GO:0033036
extracellular exosome	Gene Ontology	GO:0070062	1	445	0.300587	0.518253	FASLG	http://amigo.geneontology.org/amigo/term/GO:0070062
regulation of GTPase activity	Gene Ontology	GO:0043087	1	449	0.302835	0.520497	CCL4	http://amigo.geneontology.org/amigo/term/GO:0043087
small molecule binding	Gene Ontology	GO:0036094	1	467	0.312864	0.536059	PDE4A	http://amigo.geneontology.org/amigo/term/GO:0036094
positive regulation of cell adhesion	Gene Ontology	GO:0045785	1	474	0.316726	0.540991	ZAP70	http://amigo.geneontology.org/amigo/term/GO:0045785
regulation of cytokine production	Gene Ontology	GO:0001817	2	1432	0.317908	0.541329	SPON2|CARD11	http://amigo.geneontology.org/amigo/term/GO:0001817
lymphocyte proliferation	Gene Ontology	GO:0046651	2	1439	0.319973	0.541755	CARD11|CD3E	http://amigo.geneontology.org/amigo/term/GO:0046651
T cell activation	Gene Ontology	GO:0042110	2	1441	0.320563	0.541755	ZAP70|LCK	http://amigo.geneontology.org/amigo/term/GO:0042110
angiogenesis	Gene Ontology	GO:0001525	1	482	0.321113	0.541755	SH2D2A	http://amigo.geneontology.org/amigo/term/GO:0001525
regulation of protein modification process	Gene Ontology	GO:0031399	1	485	0.322751	0.542854	DUSP2	http://amigo.geneontology.org/amigo/term/GO:0031399
catalytic activity, acting on a protein	Gene Ontology	GO:0140096	1	488	0.324386	0.54394	DUSP2	http://amigo.geneontology.org/amigo/term/GO:0140096
nucleic acid binding	Gene Ontology	GO:0003676	1	501	0.331424	0.552373	PRF1	http://amigo.geneontology.org/amigo/term/GO:0003676
extracellular vesicle	Gene Ontology	GO:1903561	1	514	0.33839	0.561468	SPON2	http://amigo.geneontology.org/amigo/term/GO:1903561
positive regulation of production of molecular mediator of immune response	Gene Ontology	GO:0002702	1	515	0.338923	0.561468	SPON2	http://amigo.geneontology.org/amigo/term/GO:0002702
positive regulation of mast cell activation	Gene Ontology	GO:0033005	1	517	0.339987	0.561541	ZAP70	http://amigo.geneontology.org/amigo/term/GO:0033005
regulation of immune system process	Gene Ontology	GO:0002682	3	2593	0.343195	0.565063	CARD11|TIGIT|ZAP70	http://amigo.geneontology.org/amigo/term/GO:0002682
transcription by RNA polymerase II	Gene Ontology	GO:0006366	1	525	0.344229	0.565063	EOMES	http://amigo.geneontology.org/amigo/term/GO:0006366
regulation of cysteine-type endopeptidase activity involved in apoptotic process	Gene Ontology	GO:0043281	1	530	0.346866	0.565063	LCK	http://amigo.geneontology.org/amigo/term/GO:0043281
organelle organization	Gene Ontology	GO:0006996	2	1535	0.348145	0.565063	SEPTIN1|FASLG	http://amigo.geneontology.org/amigo/term/GO:0006996
positive regulation of NF-kappaB transcription factor activity	Gene Ontology	GO:0051092	1	533	0.348444	0.565063	CARD11	http://amigo.geneontology.org/amigo/term/GO:0051092
T cell differentiation in thymus	Gene Ontology	GO:0033077	1	534	0.348969	0.565063	CARD11	http://amigo.geneontology.org/amigo/term/GO:0033077
regulation of immune effector process	Gene Ontology	GO:0002697	2	1539	0.349312	0.565063	TBX21|SH2D1B	http://amigo.geneontology.org/amigo/term/GO:0002697
positive regulation of natural killer cell mediated cytotoxicity	Gene Ontology	GO:0045954	1	539	0.351587	0.567076	KLRK1	http://amigo.geneontology.org/amigo/term/GO:0045954
regulation of platelet activation	Gene Ontology	GO:0010543	1	542	0.353154	0.567937	ZAP70	http://amigo.geneontology.org/amigo/term/GO:0010543
peptidyl-tyrosine modification	Gene Ontology	GO:0018212	1	546	0.355236	0.567982	ZAP70	http://amigo.geneontology.org/amigo/term/GO:0018212
regulation of nucleic acid-templated transcription	Gene Ontology	GO:1903506	1	549	0.356794	0.567982	CARD11	http://amigo.geneontology.org/amigo/term/GO:1903506
regulation of T cell receptor signaling pathway	Gene Ontology	GO:0050856	1	549	0.356794	0.567982	LCK	http://amigo.geneontology.org/amigo/term/GO:0050856
regulation of peptidyl-tyrosine phosphorylation	Gene Ontology	GO:0050730	1	550	0.357312	0.567982	CD3E	http://amigo.geneontology.org/amigo/term/GO:0050730
monovalent inorganic cation homeostasis	Gene Ontology	GO:0055067	1	556	0.360414	0.571262	FASLG	http://amigo.geneontology.org/amigo/term/GO:0055067
regulation of leukocyte activation	Gene Ontology	GO:0002694	2	1599	0.366735	0.575268	TBX21|CD3E	http://amigo.geneontology.org/amigo/term/GO:0002694
intracellular non-membrane-bounded organelle	Gene Ontology	GO:0043232	1	569	0.367085	0.575268	PPP2R2B	http://amigo.geneontology.org/amigo/term/GO:0043232
response to biotic stimulus	Gene Ontology	GO:0009607	2	1604	0.368179	0.575268	SH2D1B|NCR3	http://amigo.geneontology.org/amigo/term/GO:0009607
positive regulation of leukocyte mediated cytotoxicity	Gene Ontology	GO:0001912	1	573	0.369124	0.575268	NCR3	http://amigo.geneontology.org/amigo/term/GO:0001912
negative thymic T cell selection	Gene Ontology	GO:0045060	1	574	0.369632	0.575268	ZAP70	http://amigo.geneontology.org/amigo/term/GO:0045060
organophosphate metabolic process	Gene Ontology	GO:0019637	1	575	0.370141	0.575268	LCK	http://amigo.geneontology.org/amigo/term/GO:0019637
positive regulation of cell killing	Gene Ontology	GO:0031343	1	579	0.37217	0.575268	KLRK1	http://amigo.geneontology.org/amigo/term/GO:0031343
regulation of mast cell degranulation	Gene Ontology	GO:0043304	1	581	0.373182	0.575268	ZAP70	http://amigo.geneontology.org/amigo/term/GO:0043304
positive regulation of alpha-beta T cell proliferation	Gene Ontology	GO:0046641	1	584	0.374697	0.575268	CD3E	http://amigo.geneontology.org/amigo/term/GO:0046641
symbiotic process	Gene Ontology	GO:0044403	1	584	0.374697	0.575268	IL2RB	http://amigo.geneontology.org/amigo/term/GO:0044403
cell surface receptor signaling pathway	Gene Ontology	GO:0007166	3	2742	0.376082	0.575268	CD7|LGR6|LCK	http://amigo.geneontology.org/amigo/term/GO:0007166
positive regulation of transport	Gene Ontology	GO:0051050	2	1636	0.377397	0.575268	ZAP70|GZMB	http://amigo.geneontology.org/amigo/term/GO:0051050
regulation of T cell mediated immunity	Gene Ontology	GO:0002709	1	591	0.378219	0.575268	NCR3	http://amigo.geneontology.org/amigo/term/GO:0002709
skeletal muscle cell differentiation	Gene Ontology	GO:0035914	1	593	0.379222	0.575268	EOMES	http://amigo.geneontology.org/amigo/term/GO:0035914
interspecies interaction between organisms	Gene Ontology	GO:0044419	1	593	0.379222	0.575268	LCK	http://amigo.geneontology.org/amigo/term/GO:0044419
negative T cell selection	Gene Ontology	GO:0043383	1	595	0.380223	0.575268	CD3E	http://amigo.geneontology.org/amigo/term/GO:0043383
extracellular space	Gene Ontology	GO:0005615	1	596	0.380723	0.575268	SPON2	http://amigo.geneontology.org/amigo/term/GO:0005615
nuclear lumen	Gene Ontology	GO:0031981	1	603	0.384211	0.578948	RUNX3	http://amigo.geneontology.org/amigo/term/GO:0031981
nucleic acid-templated transcription	Gene Ontology	GO:0097659	1	612	0.388668	0.583212	EOMES	http://amigo.geneontology.org/amigo/term/GO:0097659
regulation of kinase activity	Gene Ontology	GO:0043549	1	613	0.389161	0.583212	DUSP2	http://amigo.geneontology.org/amigo/term/GO:0043549
interleukin-12 production	Gene Ontology	GO:0032615	1	616	0.390639	0.583835	TIGIT	http://amigo.geneontology.org/amigo/term/GO:0032615
cellular response to stimulus	Gene Ontology	GO:0051716	3	2814	0.391891	0.58412	PLCH2|CD7|DUSP2	http://amigo.geneontology.org/amigo/term/GO:0051716
positive regulation of cellular metabolic process	Gene Ontology	GO:0031325	1	630	0.397488	0.59086	CARD11	http://amigo.geneontology.org/amigo/term/GO:0031325
protein-containing complex	Gene Ontology	GO:0032991	1	639	0.401851	0.594502	CD247	http://amigo.geneontology.org/amigo/term/GO:0032991
organic hydroxy compound biosynthetic process	Gene Ontology	GO:1901617	1	643	0.40378	0.594502	MVD	http://amigo.geneontology.org/amigo/term/GO:1901617
protein modification by small protein conjugation	Gene Ontology	GO:0032446	1	644	0.404261	0.594502	DTX3	http://amigo.geneontology.org/amigo/term/GO:0032446
alpha-beta T cell proliferation	Gene Ontology	GO:0046633	1	644	0.404261	0.594502	ZAP70	http://amigo.geneontology.org/amigo/term/GO:0046633
leukocyte activation	Gene Ontology	GO:0045321	2	1735	0.405574	0.594842	CARD11|ZAP70	http://amigo.geneontology.org/amigo/term/GO:0045321
tumor necrosis factor production	Gene Ontology	GO:0032640	1	652	0.408098	0.596892	SPON2	http://amigo.geneontology.org/amigo/term/GO:0032640
regulation of macromolecule metabolic process	Gene Ontology	GO:0060255	2	1748	0.409232	0.596892	PRF1|LCK	http://amigo.geneontology.org/amigo/term/GO:0060255
nitrogen compound metabolic process	Gene Ontology	GO:0006807	3	2898	0.410228	0.596892	EOMES|KLRK1|MVD	http://amigo.geneontology.org/amigo/term/GO:0006807
regulation of response to biotic stimulus	Gene Ontology	GO:0002831	1	667	0.415228	0.602574	NCR3	http://amigo.geneontology.org/amigo/term/GO:0002831
purine nucleotide metabolic process	Gene Ontology	GO:0006163	1	672	0.417586	0.604172	CARD11	http://amigo.geneontology.org/amigo/term/GO:0006163
regulation of immunoglobulin mediated immune response	Gene Ontology	GO:0002889	1	674	0.418526	0.604172	TBX21	http://amigo.geneontology.org/amigo/term/GO:0002889
immune response-activating signal transduction	Gene Ontology	GO:0002757	2	1799	0.423484	0.609729	ZAP70|CD3E	http://amigo.geneontology.org/amigo/term/GO:0002757
positive regulation of lymphocyte mediated immunity	Gene Ontology	GO:0002708	1	701	0.431079	0.616025	KLRK1	http://amigo.geneontology.org/amigo/term/GO:0002708
nucleobase-containing small molecule metabolic process	Gene Ontology	GO:0055086	1	704	0.432457	0.616025	CARD11	http://amigo.geneontology.org/amigo/term/GO:0055086
positive regulation of MAPK cascade	Gene Ontology	GO:0043410	1	706	0.433374	0.616025	CCL4	http://amigo.geneontology.org/amigo/term/GO:0043410
MAPK cascade	Gene Ontology	GO:0000165	1	706	0.433374	0.616025	CCL4	http://amigo.geneontology.org/amigo/term/GO:0000165
regulation of cellular localization	Gene Ontology	GO:0060341	2	1842	0.43537	0.616025	ZAP70|GZMB	http://amigo.geneontology.org/amigo/term/GO:0060341
chromosome localization	Gene Ontology	GO:0050000	1	711	0.435661	0.616025	SEPTIN1	http://amigo.geneontology.org/amigo/term/GO:0050000
response to nutrient levels	Gene Ontology	GO:0031667	1	715	0.437483	0.616025	CD3E	http://amigo.geneontology.org/amigo/term/GO:0031667
mast cell activation	Gene Ontology	GO:0045576	1	716	0.437938	0.616025	ZAP70	http://amigo.geneontology.org/amigo/term/GO:0045576
signal transduction by protein phosphorylation	Gene Ontology	GO:0023014	1	716	0.437938	0.616025	DUSP2	http://amigo.geneontology.org/amigo/term/GO:0023014
leukocyte cell-cell adhesion	Gene Ontology	GO:0007159	1	721	0.440206	0.617636	LCK	http://amigo.geneontology.org/amigo/term/GO:0007159
extracellular region	Gene Ontology	GO:0005576	1	736	0.446957	0.624549	LCK	http://amigo.geneontology.org/amigo/term/GO:0005576
cholesterol biosynthetic process	Gene Ontology	GO:0006695	1	737	0.447405	0.624549	MVD	http://amigo.geneontology.org/amigo/term/GO:0006695
interleukin-6 production	Gene Ontology	GO:0032635	1	741	0.44919	0.625454	SPON2	http://amigo.geneontology.org/amigo/term/GO:0032635
response to extracellular stimulus	Gene Ontology	GO:0009991	1	759	0.457155	0.634937	CD3E	http://amigo.geneontology.org/amigo/term/GO:0009991
cellular response to interferon-gamma	Gene Ontology	GO:0071346	1	774	0.463706	0.641399	CCL4	http://amigo.geneontology.org/amigo/term/GO:0071346
activation of innate immune response	Gene Ontology	GO:0002218	1	775	0.46414	0.641399	CARD11	http://amigo.geneontology.org/amigo/term/GO:0002218
isoprenoid metabolic process	Gene Ontology	GO:0006720	1	786	0.468891	0.644725	MVD	http://amigo.geneontology.org/amigo/term/GO:0006720
leukocyte mediated cytotoxicity	Gene Ontology	GO:0001909	1	786	0.468891	0.644725	KLRK1	http://amigo.geneontology.org/amigo/term/GO:0001909
positive regulation of B cell activation	Gene Ontology	GO:0050871	1	791	0.471037	0.646061	ZAP70	http://amigo.geneontology.org/amigo/term/GO:0050871
heterocyclic compound binding	Gene Ontology	GO:1901363	1	813	0.480379	0.657236	STAT4	http://amigo.geneontology.org/amigo/term/GO:1901363
positive regulation of innate immune response	Gene Ontology	GO:0045089	1	824	0.48499	0.659195	CARD11	http://amigo.geneontology.org/amigo/term/GO:0045089
cellular metabolic process	Gene Ontology	GO:0044237	2	2027	0.485019	0.659195	PLEKHF1|DTX3	http://amigo.geneontology.org/amigo/term/GO:0044237
positive regulation of hydrolase activity	Gene Ontology	GO:0051345	1	825	0.485407	0.659195	FASLG	http://amigo.geneontology.org/amigo/term/GO:0051345
alcohol metabolic process	Gene Ontology	GO:0006066	1	831	0.487903	0.660952	MVD	http://amigo.geneontology.org/amigo/term/GO:0006066
sterol metabolic process	Gene Ontology	GO:0016125	1	841	0.492036	0.664914	MVD	http://amigo.geneontology.org/amigo/term/GO:0016125
regulation of lymphocyte differentiation	Gene Ontology	GO:0045619	1	844	0.49327	0.664948	CARD11	http://amigo.geneontology.org/amigo/term/GO:0045619
regulation of immune response	Gene Ontology	GO:0050776	2	2071	0.496446	0.667592	SH2D1B|SPON2	http://amigo.geneontology.org/amigo/term/GO:0050776
protein modification process	Gene Ontology	GO:0036211	1	857	0.498582	0.667751	MVD	http://amigo.geneontology.org/amigo/term/GO:0036211
regulation of leukocyte mediated immunity	Gene Ontology	GO:0002703	1	861	0.500206	0.667751	SH2D1B	http://amigo.geneontology.org/amigo/term/GO:0002703
cellular homeostasis	Gene Ontology	GO:0019725	1	861	0.500206	0.667751	LCK	http://amigo.geneontology.org/amigo/term/GO:0019725
positive regulation of response to stimulus	Gene Ontology	GO:0048584	2	2098	0.503382	0.669319	CARD11|CD247	http://amigo.geneontology.org/amigo/term/GO:0048584
positive regulation of defense response	Gene Ontology	GO:0031349	1	872	0.504644	0.669319	CCL4	http://amigo.geneontology.org/amigo/term/GO:0031349
leukocyte activation involved in immune response	Gene Ontology	GO:0002366	1	874	0.505447	0.669319	ZAP70	http://amigo.geneontology.org/amigo/term/GO:0002366
response to endogenous stimulus	Gene Ontology	GO:0009719	1	876	0.506249	0.669319	RUNX3	http://amigo.geneontology.org/amigo/term/GO:0009719
regulation of multicellular organismal development	Gene Ontology	GO:2000026	2	2125	0.510258	0.673003	EOMES|ZAP70	http://amigo.geneontology.org/amigo/term/GO:2000026
negative regulation of catalytic activity	Gene Ontology	GO:0043086	1	892	0.512615	0.674494	KLRK1	http://amigo.geneontology.org/amigo/term/GO:0043086
regulation of innate immune response	Gene Ontology	GO:0045088	1	904	0.517338	0.679083	KLRK1	http://amigo.geneontology.org/amigo/term/GO:0045088
homophilic cell adhesion via plasma membrane adhesion molecules	Gene Ontology	GO:0007156	1	908	0.518902	0.679514	TIGIT	http://amigo.geneontology.org/amigo/term/GO:0007156
regulation of leukocyte differentiation	Gene Ontology	GO:1902105	1	923	0.524724	0.683748	CARD11	http://amigo.geneontology.org/amigo/term/GO:1902105
inflammatory response	Gene Ontology	GO:0006954	2	2187	0.525823	0.683748	ZAP70|CCL4	http://amigo.geneontology.org/amigo/term/GO:0006954
drug metabolic process	Gene Ontology	GO:0017144	1	934	0.528949	0.683748	KLRK1	http://amigo.geneontology.org/amigo/term/GO:0017144
organonitrogen compound catabolic process	Gene Ontology	GO:1901565	1	936	0.529713	0.683748	PDE4A	http://amigo.geneontology.org/amigo/term/GO:1901565
response to stimulus	Gene Ontology	GO:0050896	4	4741	0.531035	0.683748	SH2D1B|GZMM|CCL4|DTX3	http://amigo.geneontology.org/amigo/term/GO:0050896
chemokine-mediated signaling pathway	Gene Ontology	GO:0070098	1	943	0.532379	0.683748	CCL4	http://amigo.geneontology.org/amigo/term/GO:0070098
positive regulation of signaling	Gene Ontology	GO:0023056	1	946	0.533516	0.683748	LGR6	http://amigo.geneontology.org/amigo/term/GO:0023056
cellular protein metabolic process	Gene Ontology	GO:0044267	1	949	0.534651	0.683748	LCK	http://amigo.geneontology.org/amigo/term/GO:0044267
regulation of wound healing	Gene Ontology	GO:0061041	1	951	0.535407	0.683748	ZAP70	http://amigo.geneontology.org/amigo/term/GO:0061041
negative regulation of biosynthetic process	Gene Ontology	GO:0009890	1	952	0.535784	0.683748	FASLG	http://amigo.geneontology.org/amigo/term/GO:0009890
intracellular	Gene Ontology	GO:0005622	2	2228	0.535939	0.683748	STAT4|PRSS23	http://amigo.geneontology.org/amigo/term/GO:0005622
regulation of sequestering of calcium ion	Gene Ontology	GO:0051282	1	957	0.537665	0.683748	LCK	http://amigo.geneontology.org/amigo/term/GO:0051282
response to oxygen-containing compound	Gene Ontology	GO:1901700	1	960	0.53879	0.683748	SPON2	http://amigo.geneontology.org/amigo/term/GO:1901700
programmed cell death	Gene Ontology	GO:0012501	1	962	0.539539	0.683748	PPP2R2B	http://amigo.geneontology.org/amigo/term/GO:0012501
regulation of T cell proliferation	Gene Ontology	GO:0042129	1	981	0.546592	0.689807	CD3E	http://amigo.geneontology.org/amigo/term/GO:0042129
peripheral nervous system development	Gene Ontology	GO:0007422	1	983	0.547329	0.689807	RUNX3	http://amigo.geneontology.org/amigo/term/GO:0007422
response to chemical	Gene Ontology	GO:0042221	2	2278	0.548083	0.689807	KLRK1|PDE4A	http://amigo.geneontology.org/amigo/term/GO:0042221
lipid biosynthetic process	Gene Ontology	GO:0008610	1	999	0.553177	0.693786	MVD	http://amigo.geneontology.org/amigo/term/GO:0008610
protein metabolic process	Gene Ontology	GO:0019538	1	1003	0.554627	0.693786	SPOCK2	http://amigo.geneontology.org/amigo/term/GO:0019538
macromolecule biosynthetic process	Gene Ontology	GO:0009059	2	2307	0.555029	0.693786	MVD|CD3E	http://amigo.geneontology.org/amigo/term/GO:0009059
cofactor metabolic process	Gene Ontology	GO:0051186	1	1011	0.557515	0.694187	MVD	http://amigo.geneontology.org/amigo/term/GO:0051186
regulation of gene expression	Gene Ontology	GO:0010468	1	1012	0.557874	0.694187	CARD11	http://amigo.geneontology.org/amigo/term/GO:0010468
positive regulation of cellular component movement	Gene Ontology	GO:0051272	1	1059	0.574457	0.711713	LGR6	http://amigo.geneontology.org/amigo/term/GO:0051272
cellular response to biotic stimulus	Gene Ontology	GO:0071216	1	1062	0.575495	0.711713	SPON2	http://amigo.geneontology.org/amigo/term/GO:0071216
positive regulation of cytosolic calcium ion concentration	Gene Ontology	GO:0007204	1	1063	0.57584	0.711713	LCK	http://amigo.geneontology.org/amigo/term/GO:0007204
circulatory system development	Gene Ontology	GO:0072359	1	1072	0.578936	0.713934	SH2D2A	http://amigo.geneontology.org/amigo/term/GO:0072359
cellular aromatic compound metabolic process	Gene Ontology	GO:0006725	2	2422	0.581853	0.715927	TBX21|STAT4	http://amigo.geneontology.org/amigo/term/GO:0006725
positive regulation of immune system process	Gene Ontology	GO:0002684	2	2433	0.584358	0.717404	LCK|CCL4	http://amigo.geneontology.org/amigo/term/GO:0002684
regulation of signaling	Gene Ontology	GO:0023051	2	2449	0.587983	0.719134	LCK|CD3E	http://amigo.geneontology.org/amigo/term/GO:0023051
regulation of leukocyte chemotaxis	Gene Ontology	GO:0002688	1	1114	0.593092	0.719134	CCL4	http://amigo.geneontology.org/amigo/term/GO:0002688
myeloid leukocyte migration	Gene Ontology	GO:0097529	1	1117	0.594085	0.719134	CCL4	http://amigo.geneontology.org/amigo/term/GO:0097529
nucleobase-containing compound metabolic process	Gene Ontology	GO:0006139	2	2479	0.594719	0.719134	FASLG|MVD	http://amigo.geneontology.org/amigo/term/GO:0006139
regulation of cell motility	Gene Ontology	GO:2000145	1	1123	0.596064	0.719134	KLRK1	http://amigo.geneontology.org/amigo/term/GO:2000145
membrane organization	Gene Ontology	GO:0061024	1	1136	0.60032	0.719134	GZMB	http://amigo.geneontology.org/amigo/term/GO:0061024
adaptive immune response	Gene Ontology	GO:0002250	2	2508	0.601155	0.719134	CD7|SKAP1	http://amigo.geneontology.org/amigo/term/GO:0002250
antigen receptor-mediated signaling pathway	Gene Ontology	GO:0050851	1	1139	0.601296	0.719134	SKAP1	http://amigo.geneontology.org/amigo/term/GO:0050851
regulation of B cell activation	Gene Ontology	GO:0050864	1	1141	0.601945	0.719134	CARD11	http://amigo.geneontology.org/amigo/term/GO:0050864
taxis	Gene Ontology	GO:0042330	1	1149	0.604532	0.719134	SPON2	http://amigo.geneontology.org/amigo/term/GO:0042330
regulation of coagulation	Gene Ontology	GO:0050818	1	1150	0.604854	0.719134	ZAP70	http://amigo.geneontology.org/amigo/term/GO:0050818
negative regulation of biological process	Gene Ontology	GO:0048519	1	1152	0.605498	0.719134	EOMES	http://amigo.geneontology.org/amigo/term/GO:0048519
chemotaxis	Gene Ontology	GO:0006935	1	1157	0.607102	0.719134	SPON2	http://amigo.geneontology.org/amigo/term/GO:0006935
negative regulation of nitrogen compound metabolic process	Gene Ontology	GO:0051172	1	1158	0.607422	0.719134	DUSP2	http://amigo.geneontology.org/amigo/term/GO:0051172
lymphocyte costimulation	Gene Ontology	GO:0031294	1	1158	0.607422	0.719134	CD3E	http://amigo.geneontology.org/amigo/term/GO:0031294
T cell costimulation	Gene Ontology	GO:0031295	1	1160	0.608062	0.719134	LCK	http://amigo.geneontology.org/amigo/term/GO:0031295
response to cytokine	Gene Ontology	GO:0034097	1	1166	0.609974	0.719134	CCL4	http://amigo.geneontology.org/amigo/term/GO:0034097
cellular response to cytokine stimulus	Gene Ontology	GO:0071345	1	1168	0.61061	0.719134	IL21R	http://amigo.geneontology.org/amigo/term/GO:0071345
negative regulation of gene expression	Gene Ontology	GO:0010629	1	1168	0.61061	0.719134	FASLG	http://amigo.geneontology.org/amigo/term/GO:0010629
calcium-mediated signaling	Gene Ontology	GO:0019722	1	1188	0.616909	0.725	CD3E	http://amigo.geneontology.org/amigo/term/GO:0019722
regulation of molecular function	Gene Ontology	GO:0065009	1	1221	0.627086	0.735389	DUSP2	http://amigo.geneontology.org/amigo/term/GO:0065009
regulation of cellular metabolic process	Gene Ontology	GO:0031323	1	1229	0.629513	0.736002	SKAP1	http://amigo.geneontology.org/amigo/term/GO:0031323
immune system development	Gene Ontology	GO:0002520	1	1233	0.630721	0.736002	CD3E	http://amigo.geneontology.org/amigo/term/GO:0002520
negative regulation of cellular metabolic process	Gene Ontology	GO:0031324	1	1236	0.631624	0.736002	FASLG	http://amigo.geneontology.org/amigo/term/GO:0031324
regulation of endopeptidase activity	Gene Ontology	GO:0052548	1	1243	0.633723	0.736887	LCK	http://amigo.geneontology.org/amigo/term/GO:0052548
stem cell differentiation	Gene Ontology	GO:0048863	1	1275	0.643171	0.746296	EOMES	http://amigo.geneontology.org/amigo/term/GO:0048863
leukocyte chemotaxis	Gene Ontology	GO:0030595	1	1280	0.644626	0.746409	CCL4	http://amigo.geneontology.org/amigo/term/GO:0030595
embryonic morphogenesis	Gene Ontology	GO:0048598	1	1318	0.655493	0.754589	EOMES	http://amigo.geneontology.org/amigo/term/GO:0048598
cell migration	Gene Ontology	GO:0016477	1	1319	0.655774	0.754589	TBX21	http://amigo.geneontology.org/amigo/term/GO:0016477
regulation of cell differentiation	Gene Ontology	GO:0045595	1	1323	0.656898	0.754589	SPOCK2	http://amigo.geneontology.org/amigo/term/GO:0045595
movement of cell or subcellular component	Gene Ontology	GO:0006928	1	1324	0.657179	0.754589	LGR6	http://amigo.geneontology.org/amigo/term/GO:0006928
immune response	Gene Ontology	GO:0006955	2	2792	0.660266	0.756555	EOMES|CD7	http://amigo.geneontology.org/amigo/term/GO:0006955
positive regulation of leukocyte activation	Gene Ontology	GO:0002696	1	1351	0.664666	0.758736	LCK	http://amigo.geneontology.org/amigo/term/GO:0002696
positive regulation of cell activation	Gene Ontology	GO:0050867	1	1352	0.66494	0.758736	CD3E	http://amigo.geneontology.org/amigo/term/GO:0050867
regulation of T cell activation	Gene Ontology	GO:0050863	1	1357	0.666308	0.758736	CD3E	http://amigo.geneontology.org/amigo/term/GO:0050863
regulation of cellular component movement	Gene Ontology	GO:0051270	1	1376	0.671456	0.763018	LGR6	http://amigo.geneontology.org/amigo/term/GO:0051270
locomotion	Gene Ontology	GO:0040011	1	1390	0.675199	0.764716	KLRK1	http://amigo.geneontology.org/amigo/term/GO:0040011
cellular localization	Gene Ontology	GO:0051641	1	1392	0.675731	0.764716	ARL4C	http://amigo.geneontology.org/amigo/term/GO:0051641
regulation of biosynthetic process	Gene Ontology	GO:0009889	1	1407	0.679689	0.767616	RUNX3	http://amigo.geneontology.org/amigo/term/GO:0009889
organic acid metabolic process	Gene Ontology	GO:0006082	1	1434	0.686695	0.773221	SPOCK2	http://amigo.geneontology.org/amigo/term/GO:0006082
negative regulation of macromolecule metabolic process	Gene Ontology	GO:0010605	1	1437	0.687464	0.773221	EOMES	http://amigo.geneontology.org/amigo/term/GO:0010605
regulation of RNA metabolic process	Gene Ontology	GO:0051252	1	1458	0.692796	0.77689	CARD11	http://amigo.geneontology.org/amigo/term/GO:0051252
regulation of metal ion transport	Gene Ontology	GO:0010959	1	1461	0.693551	0.77689	CCL4	http://amigo.geneontology.org/amigo/term/GO:0010959
regulation of response to stress	Gene Ontology	GO:0080134	1	1491	0.700997	0.783635	ZAP70	http://amigo.geneontology.org/amigo/term/GO:0080134
organic hydroxy compound metabolic process	Gene Ontology	GO:1901615	1	1503	0.703925	0.785312	PLCH2	http://amigo.geneontology.org/amigo/term/GO:1901615
regulation of lymphocyte activation	Gene Ontology	GO:0051249	1	1529	0.710175	0.79068	CD247	http://amigo.geneontology.org/amigo/term/GO:0051249
response to bacterium	Gene Ontology	GO:0009617	1	1540	0.71278	0.791977	FASLG	http://amigo.geneontology.org/amigo/term/GO:0009617
regulation of transcription, DNA-templated	Gene Ontology	GO:0006355	1	1554	0.716062	0.79402	EOMES	http://amigo.geneontology.org/amigo/term/GO:0006355
regulation of RNA biosynthetic process	Gene Ontology	GO:2001141	1	1569	0.719538	0.796269	CARD11	http://amigo.geneontology.org/amigo/term/GO:2001141
small molecule metabolic process	Gene Ontology	GO:0044281	1	1584	0.722972	0.798463	MVD	http://amigo.geneontology.org/amigo/term/GO:0044281
calcium ion transmembrane transport	Gene Ontology	GO:0070588	1	1597	0.725916	0.800107	LCK	http://amigo.geneontology.org/amigo/term/GO:0070588
multi-organism process	Gene Ontology	GO:0051704	3	4668	0.731821	0.804451	TBX21|SEPTIN1|KLRK1	http://amigo.geneontology.org/amigo/term/GO:0051704
RNA biosynthetic process	Gene Ontology	GO:0032774	1	1629	0.733031	0.804451	EOMES	http://amigo.geneontology.org/amigo/term/GO:0032774
tissue development	Gene Ontology	GO:0009888	1	1641	0.735652	0.804451	EOMES	http://amigo.geneontology.org/amigo/term/GO:0009888
organic cyclic compound biosynthetic process	Gene Ontology	GO:1901362	1	1645	0.73652	0.804451	PDE4A	http://amigo.geneontology.org/amigo/term/GO:1901362
axon development	Gene Ontology	GO:0061564	1	1648	0.73717	0.804451	SPON2	http://amigo.geneontology.org/amigo/term/GO:0061564
cellular component organization	Gene Ontology	GO:0016043	1	1670	0.741884	0.807992	SPON2	http://amigo.geneontology.org/amigo/term/GO:0016043
transcription, DNA-templated	Gene Ontology	GO:0006351	1	1708	0.749832	0.815035	STAT4	http://amigo.geneontology.org/amigo/term/GO:0006351
signal transduction	Gene Ontology	GO:0007165	2	3371	0.759466	0.818736	KLRK1|GZMB	http://amigo.geneontology.org/amigo/term/GO:0007165
immune response-regulating cell surface receptor signaling pathway	Gene Ontology	GO:0002768	1	1756	0.759531	0.818736	SKAP1	http://amigo.geneontology.org/amigo/term/GO:0002768
aromatic compound biosynthetic process	Gene Ontology	GO:0019438	1	1761	0.76052	0.818736	PRF1	http://amigo.geneontology.org/amigo/term/GO:0019438
regulation of nucleobase-containing compound metabolic process	Gene Ontology	GO:0019219	1	1764	0.761111	0.818736	PRF1	http://amigo.geneontology.org/amigo/term/GO:0019219
immune response-regulating signaling pathway	Gene Ontology	GO:0002764	1	1769	0.762094	0.818736	SKAP1	http://amigo.geneontology.org/amigo/term/GO:0002764
central nervous system development	Gene Ontology	GO:0007417	1	1773	0.762877	0.818736	EOMES	http://amigo.geneontology.org/amigo/term/GO:0007417
nucleobase-containing compound biosynthetic process	Gene Ontology	GO:0034654	1	1777	0.763657	0.818736	CARD11	http://amigo.geneontology.org/amigo/term/GO:0034654
immune response-activating cell surface receptor signaling pathway	Gene Ontology	GO:0002429	1	1807	0.769433	0.821362	CD3E	http://amigo.geneontology.org/amigo/term/GO:0002429
nervous system development	Gene Ontology	GO:0007399	2	3440	0.769501	0.821362	RUNX3|SPOCK2	http://amigo.geneontology.org/amigo/term/GO:0007399
neuron projection morphogenesis	Gene Ontology	GO:0048812	1	1820	0.771892	0.821362	SPON2	http://amigo.geneontology.org/amigo/term/GO:0048812
regulation of neurogenesis	Gene Ontology	GO:0050767	1	1821	0.77208	0.821362	S1PR5	http://amigo.geneontology.org/amigo/term/GO:0050767
inorganic anion transport	Gene Ontology	GO:0015698	1	1851	0.777654	0.825695	CLIC3	http://amigo.geneontology.org/amigo/term/GO:0015698
cell activation	Gene Ontology	GO:0001775	1	1898	0.78612	0.833075	CD7	http://amigo.geneontology.org/amigo/term/GO:0001775
regulation of nitrogen compound metabolic process	Gene Ontology	GO:0051171	1	1915	0.789104	0.834629	PRF1	http://amigo.geneontology.org/amigo/term/GO:0051171
regulation of exocytosis	Gene Ontology	GO:0017157	1	1950	0.795119	0.837513	ZAP70	http://amigo.geneontology.org/amigo/term/GO:0017157
positive regulation of biological process	Gene Ontology	GO:0048518	1	1968	0.798147	0.837513	SH2D2A	http://amigo.geneontology.org/amigo/term/GO:0048518
nervous system process	Gene Ontology	GO:0050877	1	1969	0.798314	0.837513	PDE4A	http://amigo.geneontology.org/amigo/term/GO:0050877
homeostatic process	Gene Ontology	GO:0042592	1	1974	0.799147	0.837513	CD7	http://amigo.geneontology.org/amigo/term/GO:0042592
neuron development	Gene Ontology	GO:0048666	1	1980	0.800141	0.837513	SPON2	http://amigo.geneontology.org/amigo/term/GO:0048666
cell cycle process	Gene Ontology	GO:0022402	1	1985	0.800967	0.837513	SEPTIN1	http://amigo.geneontology.org/amigo/term/GO:0022402
cell differentiation	Gene Ontology	GO:0030154	1	2091	0.817698	0.853385	FASLG	http://amigo.geneontology.org/amigo/term/GO:0030154
system development	Gene Ontology	GO:0048731	2	3850	0.822089	0.856343	ZAP70|SPOCK2	http://amigo.geneontology.org/amigo/term/GO:0048731
regulation of ion transport	Gene Ontology	GO:0043269	1	2137	0.824524	0.857255	CCL4	http://amigo.geneontology.org/amigo/term/GO:0043269
vesicle-mediated transport	Gene Ontology	GO:0016192	1	2148	0.826119	0.857293	SPON2	http://amigo.geneontology.org/amigo/term/GO:0016192
anatomical structure development	Gene Ontology	GO:0048856	2	3916	0.829503	0.859184	CARD11|CD3E	http://amigo.geneontology.org/amigo/term/GO:0048856
lymphocyte mediated immunity	Gene Ontology	GO:0002449	1	2224	0.836756	0.865068	GZMB	http://amigo.geneontology.org/amigo/term/GO:0002449
regulation of multicellular organismal process	Gene Ontology	GO:0051239	1	2265	0.842228	0.869091	TBX21	http://amigo.geneontology.org/amigo/term/GO:0051239
adaptive immune response based on somatic recombination of immune receptors built from immunoglobulin superfamily domains	Gene Ontology	GO:0002460	1	2427	0.862147	0.88798	NCR3	http://amigo.geneontology.org/amigo/term/GO:0002460
cellular nitrogen compound metabolic process	Gene Ontology	GO:0034641	1	2448	0.864542	0.888782	TBX21	http://amigo.geneontology.org/amigo/term/GO:0034641
regulation of transport	Gene Ontology	GO:0051049	1	2511	0.871485	0.894248	ZAP70	http://amigo.geneontology.org/amigo/term/GO:0051049
nucleic acid metabolic process	Gene Ontology	GO:0090304	1	2578	0.878487	0.899754	STAT4	http://amigo.geneontology.org/amigo/term/GO:0090304
macromolecule metabolic process	Gene Ontology	GO:0043170	1	2637	0.884343	0.904069	PRF1	http://amigo.geneontology.org/amigo/term/GO:0043170
regulation of localization	Gene Ontology	GO:0032879	1	2743	0.894179	0.912428	GZMB	http://amigo.geneontology.org/amigo/term/GO:0032879
response to stress	Gene Ontology	GO:0006950	1	2773	0.896811	0.913418	ZAP70	http://amigo.geneontology.org/amigo/term/GO:0006950
organelle fission	Gene Ontology	GO:0048285	2	4737	0.901398	0.916394	SEPTIN1|MTFP1	http://amigo.geneontology.org/amigo/term/GO:0048285
transmembrane transport	Gene Ontology	GO:0055085	1	3323	0.935135	0.948569	CLIC3	http://amigo.geneontology.org/amigo/term/GO:0055085
cell development	Gene Ontology	GO:0048468	1	3348	0.936497	0.948569	EOMES	http://amigo.geneontology.org/amigo/term/GO:0048468
multicellular organism development	Gene Ontology	GO:0007275	1	3422	0.940365	0.950737	DUSP2	http://amigo.geneontology.org/amigo/term/GO:0007275
transport	Gene Ontology	GO:0006810	1	3602	0.94884	0.955854	ARL4C	http://amigo.geneontology.org/amigo/term/GO:0006810
establishment of localization	Gene Ontology	GO:0051234	1	3635	0.95026	0.955854	SEPTIN1	http://amigo.geneontology.org/amigo/term/GO:0051234
multi-organism reproductive process	Gene Ontology	GO:0044703	1	3644	0.950641	0.955854	SEPTIN1	http://amigo.geneontology.org/amigo/term/GO:0044703
cell communication	Gene Ontology	GO:0007154	1	3885	0.959838	0.963341	PDE4A	http://amigo.geneontology.org/amigo/term/GO:0007154
regulation of biological quality	Gene Ontology	GO:0065008	1	4013	0.964018	0.965774	LCK	http://amigo.geneontology.org/amigo/term/GO:0065008
cell division	Gene Ontology	GO:0051301	1	4706	0.980247	0.980247	SEPTIN1	http://amigo.geneontology.org/amigo/term/GO:0051301
--------------------
